# Supplementary material for: The Application of Statistical Parametric Mapping to Evaluate Differences in Topspin Backhand between Chinese and Polish Female Table Tennis Players
Source: Appl Bionics Biomech. 2021 Jul 14;2021:5555874. doi: 10.1155/2021/5555874 (PMC8339346; doi:10.1155/2021/5555874)
Supplement: Supplementary Materials — Angles and accelerations. [file 5555874.f1.zip]

Archive with 17 entries (17 files):
- Acc hand cykleSPM.txt
- Ankle LT-Abduction (deg) cykleSPM.txt
- Ankle LT-Dorsiflexion (deg) cykleSPM.txt
- Ankle LT-Inversion (deg) cykleSPM.txt
- Ankle RT-Abduction (deg) cykleSPM.txt
- Ankle RT-Dorsiflexion (deg) cykleSPM.txt
- Ankle RT-Inversion (deg) cykleSPM.txt
- Elbow LT-Flexion (deg) cykleSPM.txt
- Elbow RT-Flexion (deg) cykleSPM.txt
- Hip LT-Abduction (deg) cykleSPM.txt
- Hip LT-Flexion (deg) cykleSPM.txt
- Hip LT-Rotation Ext (deg) cykleSPM.txt
- Hip RT-Abduction (deg) cykleSPM.txt
- Hip RT-Flexion (deg) cykleSPM.txt
- Hip RT-Rotation Ext (deg) cykleSPM.txt
- Knee LT-Flexion (deg) cykleSPM.txt
- Knee RT-Flexion (deg) cykleSPM.txt
