# Supplementary material for: The Application of Statistical Parametric Mapping to Evaluate Differences in Topspin Backhand between Chinese and Polish Female Table Tennis Players
Source: Appl Bionics Biomech. 2021 Jul 14;2021:5555874. doi: 10.1155/2021/5555874 (PMC8339346; doi:10.1155/2021/5555874)
Supplement: Supplementary Materials — Angles and accelerations. [file 5555874.f1.zip › Acc hand cykleSPM.txt]

[1.88986210e+01 1.64383254e+01 1.42296433e+01 1.23745098e+01
 1.10466624e+01 9.75107354e+00 8.81755179e+00 8.21625162e+00
 7.63704027e+00 7.21826900e+00 7.63701033e+00 9.05862850e+00
 1.11836336e+01 1.43254077e+01 1.77960010e+01 2.08320018e+01
 2.35327884e+01 2.75138056e+01 3.27284122e+01 3.94631863e+01
 4.70717299e+01 5.51191376e+01 6.09093939e+01 6.45355429e+01
 6.62187495e+01 6.79400737e+01 7.05382877e+01 7.45875731e+01
 8.03784734e+01 8.81082509e+01 9.72818774e+01 1.06395932e+02
 1.14633762e+02 1.21538100e+02 1.27170939e+02 1.31613513e+02
 1.35555250e+02 1.38423027e+02 1.40748895e+02 1.42351082e+02
 1.41814050e+02 1.38683011e+02 1.34024772e+02 1.29636698e+02
 1.25035893e+02 1.19604565e+02 1.14063542e+02 1.08761674e+02
 1.04109872e+02 1.00274707e+02 9.66025534e+01 9.30899948e+01
 8.94527348e+01 8.62713791e+01 8.34117651e+01 8.07934032e+01
 7.85754811e+01 7.65991136e+01 7.46573977e+01 7.22479192e+01
 6.95775017e+01 6.69053210e+01 6.40261320e+01 6.13308664e+01
 5.89417663e+01 5.66525396e+01 5.44291446e+01 5.23732844e+01
 5.03671070e+01 4.84446048e+01 4.64033050e+01 4.43076329e+01
 4.23982743e+01 4.05230470e+01 3.85674100e+01 3.66713294e+01
 3.48054011e+01 3.30058096e+01 3.13380719e+01 2.97281073e+01
 2.83838284e+01 2.72048753e+01 2.60060326e+01 2.47286011e+01
 2.34270805e+01 2.18950840e+01 2.06064686e+01 1.93424000e+01
 1.82346705e+01 1.72434886e+01 1.64657123e+01 1.56251547e+01
 1.46051343e+01 1.36536453e+01 1.28300867e+01 1.21778312e+01
 1.17475301e+01 1.14852181e+01 1.12350548e+01 1.11475020e+01
 1.11143553e+01 1.10963945e+01 1.11415898e+01 1.12370588e+01
 1.13171337e+01 1.14714633e+01 1.17664056e+01 1.20714270e+01
 1.25499477e+01 1.31222697e+01 1.37433088e+01 1.44019619e+01
 1.49059091e+01 1.52044123e+01 1.55749898e+01 1.59864821e+01
 1.64222382e+01 1.69579432e+01 1.76066152e+01 1.79676755e+01
 1.77127773e+01 1.74243301e+01 1.71095551e+01 1.68026667e+01
 1.64823672e+01 1.63581278e+01 1.62715148e+01 1.62269918e+01
 1.62204263e+01 1.62806902e+01 1.64509660e+01 1.67764102e+01
 1.73679031e+01 1.84373480e+01 2.01597599e+01 2.21347896e+01
 2.43293596e+01 2.66345719e+01 2.90867716e+01 3.17552832e+01
 3.46899735e+01 3.73911593e+01 4.03667618e+01 4.36236786e+01
 4.72069990e+01 5.09543881e+01 5.44601919e+01 5.85590772e+01
 6.29408706e+01 6.77591560e+01 7.33138983e+01 7.88066434e+01
 8.40692207e+01 8.92519460e+01 9.53886982e+01 1.02783933e+02
 1.09897419e+02 1.16317250e+02 1.21436417e+02 1.25884024e+02
 1.29888651e+02 1.33918630e+02 1.36588846e+02 1.38905261e+02
 1.39982171e+02 1.38413536e+02 1.36010228e+02 1.31955076e+02
 1.25432824e+02 1.18080036e+02 1.09500946e+02 1.00144311e+02
 9.02178560e+01 8.04547780e+01 7.11815131e+01 6.29421539e+01
 5.60695965e+01 4.96906616e+01 4.37912980e+01 3.86818848e+01
 3.45054308e+01 3.12010726e+01 2.87407419e+01 2.64498872e+01
 2.42245685e+01 2.20148603e+01 1.98897031e+01 1.77415117e+01
 1.60260058e+01 1.48040992e+01 1.37196004e+01 1.24530581e+01
 1.11951141e+01 9.96169609e+00 8.78193812e+00 7.56883804e+00
 6.46582747e+00 5.57163080e+00 4.77364467e+00 4.01922363e+00
 3.30439208e+00 2.71600850e+00 2.15368241e+00 1.75588179e+00
 1.72763849e+00 1.67249531e+00 1.59727239e+00 1.50204059e+00
 1.34290318e+00 1.19492314e+00 1.03004682e+00 8.18600044e-01
 6.16572048e-01 4.23024163e-01 2.55621992e-01 1.22371329e-01
 5.19151220e-02 1.46719368e-02 5.28493796e-04 6.57881687e-03
 3.21360496e-02 7.19989729e-02 1.23656524e-01 1.70503373e-01
 2.12527032e-01 2.46208887e-01 2.90119865e-01 3.22289055e-01
 3.57052829e-01 3.82128715e-01 3.76808391e-01 3.57013737e-01
 3.05091868e-01 2.75119471e-01 2.33250328e-01 1.93394148e-01
 1.44719191e-01 5.50369615e-02 2.86566713e-03 1.62930825e-02
 8.20596181e-02 2.03829135e-01 3.83123511e-01 6.08965904e-01
 9.12717522e-01 1.27224976e+00 1.56475500e+00 1.90794263e+00
 2.29826607e+00 2.60236133e+00 2.88325657e+00 3.06498114e+00
 3.14865192e+00 3.06122639e+00 2.98838932e+00 2.97250472e+00
 2.87905643e+00 2.78813799e+00 2.73201201e+00 2.70831993e+00
 2.89995958e+00 3.08631466e+00 3.31177821e+00 3.64964526e+00
 3.97553271e+00 4.29197975e+00 4.76548720e+00 5.49810654e+00
 6.25852639e+00 7.21627414e+00 8.27961039e+00 9.43680872e+00
 1.11924594e+01 1.32961735e+01 1.58925079e+01 1.86240424e+01
 2.15218105e+01 2.44094907e+01 2.71000107e+01 2.99088515e+01
 3.23408421e+01 3.44269320e+01 3.60838437e+01 3.78829090e+01
 4.03840413e+01 4.24715112e+01 4.36983960e+01 4.44077734e+01
 4.45455008e+01 4.43287325e+01 4.41732659e+01 4.41527039e+01
 4.52220529e+01 4.88519322e+01 5.23908202e+01 5.57593449e+01
 5.90324083e+01 6.24809110e+01 6.57101291e+01 6.87192602e+01
 7.18623333e+01 7.49102840e+01 7.76312259e+01 7.93043845e+01
 8.04254925e+01 8.10509534e+01 8.10872326e+01 7.99796345e+01
 7.81193421e+01 7.66702146e+01 7.38237436e+01 6.93958414e+01
 6.39942875e+01 6.06714832e+01 5.90358029e+01 5.84265458e+01
 6.08921683e+01 6.29904856e+01 6.37552580e+01 6.32229897e+01
 6.37222065e+01 6.48988134e+01 6.46969509e+01 6.31771885e+01
 6.05245504e+01 6.25174675e+01 6.39530945e+01 6.27694864e+01
 5.96392948e+01 5.61372555e+01 5.35025918e+01 4.96741388e+01
 4.57931060e+01 4.16355857e+01 3.83041473e+01 3.51989510e+01
 3.24184642e+01 3.02546277e+01 2.81316407e+01 2.62718323e+01
 2.44399579e+01 2.29990439e+01 2.14745768e+01 1.99227337e+01
 1.83133865e+01 1.67902570e+01 1.54508056e+01 1.41406637e+01
 1.28969775e+01 1.16588853e+01 1.05320033e+01 9.55407513e+00
 8.67408496e+00 7.95275733e+00 7.18546693e+00 6.17378540e+00
 5.23963279e+00 4.43666409e+00 3.77261240e+00 3.18207224e+00
 2.62101662e+00 2.08922015e+00 1.72540096e+00 1.39166867e+00
 1.11196845e+00 7.76717607e-01 4.80305101e-01 2.29227980e-01
 5.71279408e-02 3.99032095e-04 7.00330777e-02 2.16569012e-01
 3.74828434e-01 6.15759133e-01 9.58150585e-01 1.37818697e+00
 1.80418556e+00 2.18651227e+00 2.51943419e+00 2.79472454e+00
 2.92305754e+00 2.96169100e+00 3.03374518e+00 3.08782104e+00
 3.13076818e+00 3.19954944e+00 3.28815245e+00 3.24635205e+00
 3.11291649e+00 2.95898673e+00 2.68196951e+00 2.40884989e+00
 2.12063934e+00 1.81760631e+00 1.54030442e+00 1.41030664e+00
 1.28915354e+00 1.16682086e+00 1.02655727e+00 8.73831510e-01
 7.08778788e-01 5.65408136e-01 4.54862335e-01 3.98337247e-01
 3.38804334e-01 2.76294335e-01 2.15383532e-01 1.57876189e-01
 1.10508743e-01 6.87890542e-02 3.85574193e-02 1.55503130e-02
 4.19662734e-03 2.22695499e-04 1.03258226e-02 2.30653204e-02
 3.73736230e-02 6.66996395e-02 1.16912864e-01 1.85318007e-01
 2.78439712e-01 4.00816475e-01 5.22186126e-01 6.03390342e-01
 7.01333582e-01 8.58967797e-01 1.05384972e+00 1.24481264e+00
 1.44357251e+00 1.64630781e+00 1.78531202e+00 1.95741537e+00
 2.21628973e+00 2.50435156e+00 2.78324279e+00 3.14182746e+00
 3.60022115e+00 4.08555034e+00 4.59127430e+00 5.08862720e+00
 5.64653894e+00 6.26866716e+00 6.94567490e+00 7.75860854e+00
 8.68208375e+00 9.48799458e+00 1.00720639e+01 1.06624431e+01
 1.13297549e+01 1.21573910e+01 1.31344493e+01 1.41451368e+01
 1.53256618e+01 1.65804583e+01 1.77780207e+01 1.89809799e+01
 2.02307433e+01 2.17017682e+01 2.32543788e+01 2.47317943e+01
 2.60034804e+01 2.70378886e+01 2.76670253e+01 2.77406912e+01
 2.74586088e+01 2.70796386e+01 2.74873345e+01 2.80955361e+01
 2.85066772e+01 2.89324904e+01 3.05589308e+01 3.18838531e+01
 3.30322830e+01 3.39234574e+01 3.46631281e+01 3.50588989e+01
 3.52237696e+01 3.50646616e+01 3.45388670e+01 3.37126710e+01
 3.27592095e+01 3.19397375e+01 3.12567927e+01 3.07365636e+01
 3.01556927e+01 2.93713127e+01 2.86637915e+01 2.74365322e+01
 2.64192598e+01 2.56614047e+01 2.48567168e+01 2.38691129e+01
 2.27585581e+01 2.15863177e+01 2.10704837e+01 2.06601497e+01
 2.01345122e+01 1.96793018e+01 1.92120846e+01 1.85453358e+01
 1.79734271e+01 1.79883235e+01 1.80621910e+01 1.82442878e+01
 1.85128392e+01 1.87080125e+01 1.88017074e+01 1.89224527e+01
 1.99205140e+01 2.11256312e+01 2.23524521e+01 2.40430968e+01
 2.61876697e+01 2.82965150e+01 3.04954189e+01 3.29745447e+01
 3.57856333e+01 3.88033342e+01 4.18190581e+01 4.46372899e+01
 4.72834218e+01 4.97921767e+01 5.13668083e+01 5.27660971e+01
 5.39252020e+01 5.40753386e+01 5.34757192e+01 5.21564245e+01
 5.02451833e+01 4.75456880e+01 4.46986149e+01 4.16808972e+01
 3.87851355e+01 3.61517251e+01 3.38838578e+01 3.17590175e+01
 3.00840101e+01 2.87725740e+01 2.74931952e+01 2.65483184e+01
 2.55632651e+01 2.45099659e+01 2.36565721e+01 2.32477278e+01
 2.26907714e+01 2.19219329e+01 2.14613573e+01 2.11773818e+01
 2.07441988e+01 2.07013879e+01 2.10839032e+01 2.14917410e+01
 2.19659484e+01 2.23731719e+01 2.28399544e+01 2.33027909e+01
 2.36997771e+01 2.39689935e+01 2.41182482e+01 2.41963533e+01
 2.38581512e+01 2.31036970e+01 2.23092379e+01 2.15689897e+01
 2.11143376e+01 2.08483078e+01 2.10065751e+01 2.19004582e+01
 2.29163667e+01 2.37855325e+01 2.47255572e+01 2.57718184e+01
 2.65390425e+01 2.73589164e+01 2.81056286e+01 2.87053677e+01
 2.91700397e+01 2.97738164e+01 3.01262725e+01 3.03413044e+01
 3.01613939e+01 2.94149665e+01 2.80195040e+01 2.62849207e+01
 2.51236872e+01 2.41555133e+01 2.32592904e+01 2.21726119e+01
 2.09738342e+01 1.99082200e+01 1.92322128e+01 1.87427075e+01
 1.80872362e+01 1.73386608e+01 1.63414856e+01 1.54289019e+01
 1.47710496e+01 1.41260169e+01 1.43007731e+01 1.47184361e+01
 1.50638218e+01 1.54626840e+01 1.61994450e+01 1.73473899e+01
 1.85240312e+01 1.98461151e+01 2.12999324e+01 2.27966427e+01
 2.43617257e+01 2.60242261e+01 2.77688190e+01 2.94766626e+01
 3.12879366e+01 3.29929377e+01 3.48221717e+01 3.67500758e+01
 3.81269899e+01 3.90385096e+01 3.98852726e+01 4.11834709e+01
 4.16691751e+01 4.20366984e+01 4.23951910e+01 4.28997779e+01
 4.34675217e+01 4.40982942e+01 4.47335573e+01 4.50988146e+01
 4.53107237e+01 4.54781599e+01 4.63402780e+01 4.74861334e+01
 4.82569151e+01 4.87253251e+01 4.89794015e+01 4.91650335e+01
 4.94536418e+01 4.99369675e+01 5.00790676e+01 5.00901386e+01
 5.02914350e+01 5.02742424e+01 5.02149436e+01 5.01223768e+01
 4.97154799e+01 4.90194988e+01 4.82818919e+01 4.75379641e+01
 4.67793070e+01 4.59766182e+01 4.52852354e+01 4.45215827e+01
 4.37074725e+01 4.28499954e+01 4.20657114e+01 4.15201439e+01
 4.14964833e+01 4.15071638e+01 4.14713223e+01 4.14097538e+01
 4.13111767e+01 4.13653805e+01 4.15698292e+01 4.18653468e+01
 4.22719525e+01 4.31116488e+01 4.41792709e+01 4.53438052e+01
 4.67069692e+01 4.83151315e+01 4.99756359e+01 5.15509434e+01
 5.35795133e+01 5.59816681e+01 5.87793528e+01 6.16543050e+01
 6.41632180e+01 6.68133955e+01 6.95197799e+01 7.23579232e+01
 7.53720586e+01 7.78044863e+01 7.97844928e+01 8.06751125e+01
 8.08273102e+01 8.09324102e+01 8.12084857e+01 8.10434180e+01
 8.00897548e+01 7.87029928e+01 7.67918508e+01 7.49663306e+01
 7.30022759e+01 7.05263814e+01 6.77913948e+01 6.46565528e+01
 6.15834898e+01 5.87124363e+01 5.58631597e+01 5.29665326e+01
 5.02262229e+01 4.75985106e+01 4.51253808e+01 4.25953384e+01
 4.01121797e+01 3.76424314e+01 3.52224544e+01 3.29847000e+01
 3.10778911e+01 2.96366402e+01 2.82595938e+01 2.67310302e+01
 2.50874963e+01 2.35136125e+01 2.19866129e+01 2.06475712e+01
 1.95524191e+01 1.86100379e+01 1.78301392e+01 1.72086294e+01
 1.66469331e+01 1.59536330e+01 1.52055204e+01 1.44230610e+01
 1.36032895e+01 1.28020157e+01 1.20203714e+01 1.11886015e+01
 1.04567816e+01 9.68913358e+00 8.85474814e+00 8.03520764e+00
 7.27256835e+00 6.46048859e+00 5.77376470e+00 5.18384451e+00
 4.66519827e+00 4.29572103e+00 3.95276873e+00 3.60976915e+00
 3.31959477e+00 3.10250039e+00 2.91159586e+00 2.77670975e+00
 2.74049485e+00 2.72475798e+00 2.72724466e+00 2.76928184e+00
 2.83018125e+00 2.87653820e+00 2.95012257e+00 3.18934046e+00
 3.50351379e+00 3.88208475e+00 4.37629106e+00 4.98509364e+00
 5.64975905e+00 6.37772453e+00 7.14506089e+00 8.09397061e+00
 9.12729185e+00 1.01909219e+01 1.14698212e+01 1.31744596e+01
 1.50114171e+01 1.68701409e+01 1.87685548e+01 2.07855939e+01
 2.29879653e+01 2.55533429e+01 2.79985463e+01 3.05271165e+01
 3.31865135e+01 3.57560620e+01 3.83276558e+01 4.06067636e+01
 4.26046500e+01 4.48375123e+01 4.70877311e+01 4.89774862e+01
 5.06128189e+01 5.19675141e+01 5.33836549e+01 5.48638660e+01
 5.66426216e+01 5.82850226e+01 5.96043593e+01 6.07217944e+01
 6.17091729e+01 6.26512563e+01 6.32513588e+01 6.37121909e+01
 6.43599319e+01 6.54758429e+01 6.66228997e+01 6.77575052e+01
 6.89239875e+01 6.99582138e+01 7.10646050e+01 7.21341450e+01
 7.31104602e+01 7.41000678e+01 7.50803939e+01 7.60413686e+01
 7.69902383e+01 7.81081428e+01 7.93241036e+01 8.07214649e+01
 8.22360317e+01 8.38345421e+01 8.51001718e+01 8.63277493e+01
 8.76851169e+01 8.91882551e+01 9.07872336e+01 9.23883544e+01
 9.39725866e+01 9.56560783e+01 9.75382004e+01 9.93304855e+01
 1.01117560e+02 1.02816113e+02 1.04410478e+02 1.06055618e+02
 1.07583476e+02 1.09209150e+02 1.10845890e+02 1.12235040e+02
 1.13683309e+02 1.15237921e+02 1.16866238e+02 1.18504705e+02
 1.20235500e+02 1.21970695e+02 1.24060413e+02 1.26175707e+02
 1.28411535e+02 1.30835666e+02 1.33743432e+02 1.36793874e+02
 1.39968244e+02 1.42880452e+02 1.45562213e+02 1.48395549e+02
 1.51429338e+02 1.54104426e+02 1.57062267e+02 1.60176740e+02
 1.62840142e+02 1.65772190e+02 1.68312400e+02 1.70502227e+02
 1.72119583e+02 1.73059405e+02 1.73304021e+02 1.72528953e+02
 1.70257464e+02 1.67456089e+02 1.64134150e+02 1.60299686e+02
 1.56554184e+02 1.51811551e+02 1.45228098e+02 1.37698616e+02
 1.29641084e+02 1.21490761e+02 1.13503987e+02 1.06035947e+02
 9.91000785e+01 9.30568859e+01 8.64193897e+01 7.97520998e+01
 7.29033486e+01 6.63806098e+01 5.96091414e+01 5.38482890e+01
 4.91086121e+01 4.46174041e+01 4.00647586e+01 3.54053051e+01
 3.06618470e+01 2.61340590e+01 2.18304507e+01 1.76760773e+01
 1.37105155e+01 1.00676941e+01 7.05512107e+00 4.61085147e+00
 2.74304732e+00 1.30055203e+00 3.87346503e-01 1.96757720e-02
 1.13952997e-01 6.08369763e-01 1.39596276e+00 2.43356010e+00
 3.59304906e+00 4.70340481e+00 5.84246541e+00 7.02329631e+00
 8.21852098e+00 9.42156463e+00 1.05046383e+01 1.08910378e+01
 1.09410736e+01 1.08925313e+01 1.06724964e+01 1.04351623e+01
 1.05007166e+01 1.03683674e+01 9.63848017e+00 9.06520669e+00
 8.46385212e+00 7.71279249e+00 6.93438127e+00 6.13102419e+00
 5.18143693e+00 4.27487997e+00 3.44772441e+00 2.66046355e+00
 1.88531546e+00 1.40167443e+00 9.37902196e-01 4.93396444e-01
 1.59793907e-01 3.77294483e-03 8.02579307e-02 4.29273963e-01
 1.11925224e+00 2.17581288e+00 3.83759671e+00 5.75747962e+00
 8.25115030e+00 1.16010074e+01 1.59137699e+01 2.08356125e+01
 2.53104425e+01 3.05068073e+01 3.78538478e+01 4.66631449e+01
 5.37277286e+01 5.72108505e+01 5.93904378e+01 6.12047871e+01
 6.33949434e+01 6.76989887e+01 7.35969161e+01 7.79916876e+01
 8.13009684e+01 8.45636439e+01 8.72901060e+01 9.08034798e+01
 8.96824320e+01 8.95184258e+01 8.92589529e+01 8.81386094e+01
 8.62339824e+01 8.35270942e+01 7.97015798e+01 7.30537950e+01
 6.70349248e+01 6.06315171e+01 5.36301637e+01 4.64858434e+01
 3.93972838e+01 3.17859446e+01 2.48525043e+01 1.70931042e+01
 9.41687766e+00 3.90779655e+00 7.67975181e-01 3.85358419e-04
 5.57981847e-01 1.49112424e+00 2.39721198e+00 3.14154966e+00
 3.59329236e+00 4.02184344e+00 4.94843938e+00 5.79566925e+00
 6.37785896e+00 6.36239709e+00 6.08930849e+00 5.61083715e+00
 5.13425261e+00 4.84369784e+00 4.83950878e+00 4.02787593e+00
 3.25072967e+00 2.34131794e+00 1.53067154e+00 7.37302888e-01
 2.56120461e-01 4.80666849e-02 5.12869186e-03 6.16853058e-02
 8.39229542e-02 1.25535672e-01 2.15737070e-01 4.10794910e-01]
SPM{F} inference field
   SPM.effect    :   Main A
   SPM.z         :  (1x1000) raw test stat field
   SPM.df        :  (1.858, 112.722)
   SPM.fwhm      :  29.66956
   SPM.resels    :  (1, 33.67088)
Inference:
   SPM.alpha     :  0.050
   SPM.zstar     :  8.36210
   SPM.h0reject  :  True
   SPM.p_set     :  <0.001
   SPM.p_cluster :  (0.038, <0.001, <0.001, <0.001, <0.001, 0.021, <0.001)
