# Supplementary material for: The Application of Statistical Parametric Mapping to Evaluate Differences in Topspin Backhand between Chinese and Polish Female Table Tennis Players
Source: Appl Bionics Biomech. 2021 Jul 14;2021:5555874. doi: 10.1155/2021/5555874 (PMC8339346; doi:10.1155/2021/5555874)
Supplement: Supplementary Materials — Angles and accelerations. [file 5555874.f1.zip › Ankle LT-Abduction (deg) cykleSPM.txt]

[18.39093596 18.33419015 18.28409012 18.23387469 18.17710714 18.1118566
 18.04995739 17.99897327 17.92655682 17.85067309 17.76973009 17.68553152
 17.58922382 17.49688233 17.39656296 17.29811191 17.18412319 17.06094732
 16.93052009 16.81602859 16.68940181 16.5516575  16.43508716 16.30998097
 16.16944669 16.01505085 15.85364513 15.69040225 15.53540241 15.40117968
 15.25160085 15.09382042 14.93871636 14.78367695 14.62111995 14.44222297
 14.22815363 14.00738179 13.79028981 13.57260452 13.365857   13.20528047
 13.04331028 12.87372135 12.70740182 12.54777397 12.39266952 12.24182597
 12.11191237 11.96435248 11.79805555 11.64450506 11.51086155 11.39203047
 11.28296217 11.19204051 11.07443082 10.91621671 10.75593884 10.60546657
 10.46990713 10.3420238  10.23169365 10.16514112 10.09525711 10.01265889
  9.94961683  9.89049596  9.83536636  9.78867068  9.76308515  9.74263326
  9.72117908  9.70115668  9.67043656  9.63936177  9.61012304  9.56431114
  9.4514468   9.35154474  9.25549598  9.15546575  9.04619824  8.9376637
  8.80791346  8.69074759  8.56257623  8.43177213  8.30115059  8.16576535
  8.03680611  7.94948537  7.87908579  7.81042902  7.74773649  7.69185707
  7.61280847  7.50030762  7.38680168  7.27081945  7.15859583  7.05230037
  6.93592289  6.82183671  6.68104951  6.54964715  6.38517431  6.2326241
  6.12060269  6.02048245  5.93531224  5.90372705  5.87930044  5.87097765
  5.8886912   5.91089501  5.93787016  5.94199279  6.01132869  5.99830289
  6.00388971  6.00656089  5.98701627  5.95854605  5.92363604  5.84487751
  5.7573741   5.69622906  5.63950835  5.58741947  5.53799907  5.50992825
  5.43602319  5.44062793  5.41426812  5.38678766  5.35527294  5.32594005
  5.3081041   5.30047687  5.28263627  5.24653583  5.2137507   5.1769673
  5.13719608  5.10272999  5.07987027  5.06014715  5.03528553  5.00605381
  4.97762272  4.95931564  4.94384973  4.92952687  4.92242791  4.93034499
  4.95459297  4.96918594  4.97750727  4.97025877  4.9549471   4.9578127
  5.01041057  5.05907539  5.10217356  5.13921135  5.183801    5.22701073
  5.25117468  5.3037226   5.35688315  5.39279228  5.41514539  5.4340359
  5.46897329  5.52432561  5.5834831   5.63169151  5.66175808  5.68240285
  5.69360877  5.7071414   5.73062722  5.73476895  5.7306226   5.71581453
  5.70851463  5.69465355  5.69923947  5.70750376  5.705198    5.7028665
  5.69156658  5.67648895  5.66300042  5.65273284  5.64863682  5.66569182
  5.67346195  5.68078107  5.6890931   5.69159028  5.69363798  5.69102847
  5.67503342  5.6467097   5.60812256  5.56666082  5.51816415  5.47779426
  5.44502353  5.42294014  5.39754127  5.3655266   5.33532304  5.29906761
  5.26313983  5.22265864  5.1803914   5.1351909   5.08317592  5.03631269
  4.9927361   4.94660618  4.8971493   4.8551387   4.80810621  4.75576358
  4.7062532   4.66322708  4.61518665  4.57263383  4.54317833  4.51087155
  4.48633805  4.47762811  4.4781239   4.4720886   4.4671316   4.47536197
  4.4860439   4.49855397  4.51721672  4.53664238  4.54313843  4.5440153
  4.51897676  4.48845668  4.45646724  4.43266362  4.40925246  4.38701319
  4.36687938  4.35991078  4.35043831  4.34195358  4.33289663  4.32616574
  4.33647718  4.33253253  4.30313006  4.27328721  4.2411489   4.19971174
  4.1559384   4.1284927   4.10678506  4.08831331  4.0712456   4.06050568
  4.04595351  4.03300801  4.0245392   4.01977465  4.02940517  4.03140289
  4.03578343  4.03951669  4.0416861   4.03364513  4.03231659  4.04224659
  4.06289799  4.0800602   4.09658451  4.10429922  4.08850924  4.07311967
  4.04891691  4.02720614  4.00794572  3.99581472  4.00176811  4.04879327
  4.1104442   4.18535617  4.26721211  4.35883612  4.47381174  4.62204064
  4.80927626  4.98312509  5.13517016  5.28480876  5.42992389  5.56213677
  5.69756508  5.84873473  6.00204725  6.15024575  6.29278863  6.43847472
  6.60154061  6.74879427  6.88385494  7.04247305  7.23429977  7.42532012
  7.61888113  7.80173398  7.9961067   8.19680285  8.40298853  8.61800087
  8.82939662  9.02515537  9.20658547  9.35985855  9.49300303  9.61479945
  9.72219289  9.8262107   9.90555652  9.96857159  9.99479559  9.99644754
  9.97777009  9.90629321  9.82701373  9.72537698  9.63578224  9.58047239
  9.52378908  9.4554899   9.38143267  9.30344593  9.24054919  9.17983867
  9.18637931  9.22159315  9.25932953  9.3248426   9.38941966  9.45959617
  9.52284071  9.58563698  9.65013264  9.71985399  9.79495362  9.85018425
  9.89046218  9.94828837 10.01073524 10.07816815 10.12878127 10.1563163
 10.19301029 10.23872957 10.29238736 10.3360262  10.37156206 10.40714326
 10.44787402 10.49203485 10.53622437 10.57261206 10.60037129 10.62660759
 10.65840393 10.69945791 10.74519576 10.79074852 10.82610407 10.85083463
 10.8719745  10.89495154 10.92435019 10.95113719 10.97147399 10.99069172
 10.99993108 11.00337101 11.01520675 11.03885032 11.06538229 11.09510805
 11.11716003 11.12600348 11.13524649 11.15175464 11.18460835 11.20775403
 11.23156    11.25700442 11.29386151 11.33233858 11.36063691 11.36951861
 11.38474199 11.40287489 11.41694701 11.43254869 11.44921644 11.47365542
 11.50116124 11.52040596 11.53554    11.55443745 11.5806958  11.6089508
 11.62393105 11.620869   11.6078216  11.58109472 11.55744549 11.53940812
 11.51988069 11.48804817 11.4404599  11.38702536 11.32343898 11.25954908
 11.19900374 11.13589615 11.06577547 10.98768192 10.90416516 10.81347088
 10.71979393 10.6204551  10.52371616 10.44218591 10.38992576 10.34677943
 10.30842979 10.26405233 10.21783939 10.16949557 10.13513501 10.12209434
 10.11106922 10.10004019 10.09051322 10.08856651 10.08490894 10.08968337
 10.10844384 10.12529949 10.13847851 10.15289251 10.1689636  10.17891161
 10.189034   10.21346843 10.23878767 10.27494109 10.31532138 10.35033814
 10.38422871 10.40632754 10.42079408 10.44163907 10.47052074 10.49626038
 10.52026831 10.5443059  10.56468851 10.56941235 10.57252607 10.58197432
 10.59228075 10.60262272 10.6115862  10.59810534 10.54428965 10.49576749
 10.4533131  10.4129298  10.37139969 10.33028609 10.28498212 10.231413
 10.18536403 10.14178248 10.11006369 10.07678742 10.0372734  10.00953939
 10.00055037  9.99167726  9.98506135  9.97696362  9.96718044  9.95616485
  9.9621788   9.9792272  10.0074228  10.04437374 10.09169341 10.13843264
 10.19274662 10.24830137 10.3106027  10.37384564 10.4342774  10.48935528
 10.5450912  10.60197885 10.66140105 10.7210194  10.78346552 10.8445487
 10.90073216 10.95702313 11.01353298 11.05530553 11.09575454 11.13373524
 11.16960921 11.19622724 11.22527661 11.25387951 11.27321512 11.28812015
 11.29588184 11.29878007 11.31013925 11.30929703 11.30620203 11.28973987
 11.26127642 11.21888191 11.17530029 11.12461564 11.07622554 11.03976962
 10.99175845 10.94355568 10.89287235 10.81915446 10.73233978 10.65249494
 10.58093231 10.51157134 10.44347345 10.38265798 10.31701596 10.26732421
 10.21401899 10.16927558 10.14078436 10.11128409 10.08106187 10.05699456
 10.03818797 10.00822304  9.97929484  9.96705134  9.94869441  9.9285477
  9.91142777  9.88544573  9.85937623  9.83839778  9.81758189  9.80831789
  9.80969412  9.81034355  9.83048563  9.85329341  9.87500107  9.89928037
  9.93652668  9.9866587  10.01675581 10.04287819 10.06494443 10.07966125
 10.09492239 10.10135566 10.10507115 10.12852533 10.16067604 10.19093602
 10.20104272 10.21666496 10.23290233 10.24486957 10.25457147 10.26496152
 10.27524607 10.28116935 10.27971297 10.27624699 10.26206044 10.25864976
 10.25453113 10.23871773 10.20792815 10.16996195 10.11963245 10.05643916
  9.99700595  9.93717252  9.87436948  9.81823154  9.75903712  9.70284893
  9.64514971  9.5727412   9.49515666  9.43614651  9.4166367   9.39505985
  9.37795582  9.36358319  9.35295048  9.33803949  9.32885783  9.29573723
  9.2603978   9.21876438  9.17751017  9.15521847  9.13343651  9.11541376
  9.10967166  9.11578122  9.12764771  9.13745252  9.13369774  9.12769052
  9.12136565  9.11731432  9.11828257  9.12261384  9.12689234  9.13699452
  9.1426383   9.14686096  9.15428746  9.16002778  9.17145937  9.18372185
  9.21262711  9.25005573  9.28032337  9.30752246  9.33669225  9.36668925
  9.3945449   9.42258558  9.4530429   9.47820468  9.5028491   9.52447154
  9.54764105  9.57357966  9.60234707  9.63020979  9.64816155  9.66591294
  9.67662586  9.6729683   9.67051835  9.68007192  9.69297221  9.70403281
  9.71536796  9.72745877  9.73597029  9.74948752  9.769527    9.78851214
  9.81236809  9.84159522  9.88440015  9.93442238  9.98545627 10.03429759
 10.08743522 10.15492115 10.23085468 10.31661309 10.40640383 10.48314893
 10.55157227 10.60905564 10.6607496  10.71579258 10.77968612 10.84353382
 10.89422055 10.94884201 11.00710649 11.06533253 11.12340619 11.17656038
 11.22830361 11.29009691 11.3566984  11.42451256 11.49286041 11.5613141
 11.6315424  11.70374873 11.76245554 11.81620361 11.85278809 11.88088932
 11.90525161 11.89690436 11.87567237 11.87065399 11.87212469 11.87479204
 11.87746074 11.85571154 11.81372472 11.76419489 11.72671929 11.69122444
 11.65325369 11.61800288 11.58230076 11.55173864 11.51944877 11.48744705
 11.45595764 11.44244704 11.42915188 11.41310939 11.41335116 11.41931447
 11.41799283 11.39424227 11.36144096 11.32739011 11.29389598 11.24728562
 11.19551797 11.15569764 11.11801845 11.08900129 11.05984762 11.02664678
 10.99588113 10.97393432 10.93505616 10.9064957  10.8951614  10.88245198
 10.86896373 10.85340781 10.83254    10.79908179 10.75640488 10.7052047
 10.65128514 10.59771577 10.52691098 10.45629657 10.42186172 10.38168955
 10.33638255 10.2849635  10.23289649 10.20512835 10.18693775 10.18106518
 10.17233151 10.16231306 10.15240033 10.14226998 10.12663362 10.11568068
 10.12750845 10.13822338 10.14795014 10.15488787 10.15952481 10.14905248
 10.10967144 10.02543451  9.93638194  9.84437451  9.75077956  9.65431715
  9.61630112  9.59308889  9.57329163  9.54805803  9.52172501  9.4953981
  9.47120065  9.43605187  9.42810315  9.45781791  9.48173679  9.50268575
  9.5260299   9.55081689  9.54583571  9.53237368  9.51479565  9.49388404
  9.47547907  9.45992617  9.44560616  9.47008132  9.48407755  9.4814079
  9.48398234  9.48659261  9.48997901  9.49390701  9.48393765  9.47564014
  9.47672074  9.48983583  9.50439855  9.51995998  9.53566399  9.53772918
  9.50135453  9.45601348  9.41868051  9.38436654  9.34986553  9.31424241
  9.32014562  9.3386311   9.35764957  9.37422396  9.3869249   9.39944823
  9.4125878   9.45709031  9.55905274  9.67237232  9.78371328  9.89467834
 10.00648772 10.11943445 10.21818066 10.3320146  10.43523459 10.53521753
 10.63442167 10.73369785 10.83642777 10.91826672 11.0232506  11.1490162
 11.27566896 11.39973436 11.52262606 11.64674231 11.76386685 11.84276349
 11.95508423 12.06978265 12.18439669 12.29553167 12.40480778 12.54458848
 12.73709514 12.93623652 13.14254006 13.36304775 13.58538401 13.80706466
 14.05335743 14.2960534  14.52798043 14.75998678 14.99580487 15.23094721
 15.46606751 15.69312932 15.92185612 16.15132289 16.3803256  16.61503889
 16.84912474 17.08070661 17.28984071 17.46008263 17.59302238 17.71865697
 17.84333095 17.9679416  18.08791971 18.22064072 18.36312283 18.51475304
 18.66218724 18.80651501 18.94628403 19.07926734 19.19850557 19.288351
 19.36208858 19.42563503 19.48121741 19.53603834 19.5857593  19.62393993
 19.70438146 19.7902767  19.86643599 19.92785536 19.98307491 20.03928483
 20.09347657 20.17681855 20.25104788 20.31266015 20.36699772 20.42225873
 20.47856932 20.52507274 20.53299986 20.53755781 20.54456639 20.55604747
 20.5798097  20.59940752 20.59028865 20.59446104 20.60155915 20.60349689
 20.60731827 20.63387685 20.66330535 20.65466853 20.6142469  20.57965292
 20.554198   20.52948727 20.50438412 20.46566066 20.43775877 20.40072786
 20.36356037 20.33911586 20.33323187 20.32251757 20.33131092 20.41035087
 20.48760965 20.5626375  20.62199091 20.67116387 20.71095892 20.72351183
 20.75466046 20.79966175 20.84815403 20.88941759 20.90152604 20.88933765
 20.8721459  20.86429118 20.86392623 20.86512848 20.85258417 20.81117433
 20.74288952 20.67360817 20.58470526 20.49456525 20.41100168 20.32536683
 20.24450194 20.16710942 20.07781467 19.96962023 19.85906881 19.74199981
 19.62085269 19.49882269 19.38026447 19.25854972 19.14343048 19.03074099
 18.93714176 18.84600792 18.76503513 18.69061935]
SPM{F} inference field
   SPM.effect    :   Main A
   SPM.z         :  (1x1000) raw test stat field
   SPM.df        :  (1.167, 89.396)
   SPM.fwhm      :  233.21318
   SPM.resels    :  (1, 4.28363)
Inference:
   SPM.alpha     :  0.050
   SPM.zstar     :  7.55497
   SPM.h0reject  :  True
   SPM.p_set     :  <0.001
   SPM.p_cluster :  (0.027, <0.001)
