# Supplementary material for: The Application of Statistical Parametric Mapping to Evaluate Differences in Topspin Backhand between Chinese and Polish Female Table Tennis Players
Source: Appl Bionics Biomech. 2021 Jul 14;2021:5555874. doi: 10.1155/2021/5555874 (PMC8339346; doi:10.1155/2021/5555874)
Supplement: Supplementary Materials — Angles and accelerations. [file 5555874.f1.zip › Ankle LT-Dorsiflexion (deg) cykleSPM.txt]

[3.56131055e-03 8.61985132e-03 1.56611448e-02 2.43194808e-02
 3.44610238e-02 4.59359799e-02 5.76716935e-02 7.01725896e-02
 8.64656559e-02 1.04301779e-01 1.23345025e-01 1.43491164e-01
 1.63193580e-01 1.83028501e-01 2.02414604e-01 2.28087180e-01
 2.54209377e-01 2.80603669e-01 3.07902468e-01 3.37860316e-01
 3.67237181e-01 3.98058848e-01 4.47999194e-01 4.98994737e-01
 5.48614415e-01 6.01439274e-01 6.55225492e-01 7.09091864e-01
 7.62648746e-01 8.27113844e-01 8.92586972e-01 9.58194799e-01
 1.02173771e+00 1.08429798e+00 1.14442738e+00 1.20563964e+00
 1.28322654e+00 1.36215436e+00 1.43831399e+00 1.51439449e+00
 1.59170275e+00 1.67131836e+00 1.74919113e+00 1.83829190e+00
 1.92596678e+00 2.01000622e+00 2.09403930e+00 2.17817984e+00
 2.26024260e+00 2.35245048e+00 2.46766249e+00 2.58307092e+00
 2.69722256e+00 2.81190402e+00 2.92241367e+00 3.03096135e+00
 3.18707156e+00 3.38608804e+00 3.58505307e+00 3.78076182e+00
 3.97364702e+00 4.16290863e+00 4.34975024e+00 4.53073476e+00
 4.70292633e+00 4.87002702e+00 5.03700819e+00 5.20072008e+00
 5.36024085e+00 5.51440585e+00 5.64039210e+00 5.74251757e+00
 5.83632931e+00 5.92028538e+00 5.99903118e+00 6.07460310e+00
 6.14465136e+00 6.18774804e+00 6.25061969e+00 6.31034654e+00
 6.36476408e+00 6.41607115e+00 6.46084685e+00 6.49447583e+00
 6.51435343e+00 6.48864599e+00 6.46091967e+00 6.42478122e+00
 6.38351537e+00 6.33208714e+00 6.26261446e+00 6.22403548e+00
 6.13534726e+00 6.04091294e+00 5.94519873e+00 5.84920658e+00
 5.77874377e+00 5.72398294e+00 5.68504752e+00 5.70731941e+00
 5.73590289e+00 5.77295333e+00 5.83565259e+00 5.90679824e+00
 6.01253429e+00 6.03573520e+00 6.08140844e+00 6.10967169e+00
 6.09721107e+00 6.06976644e+00 6.00741051e+00 5.95445804e+00
 5.90900372e+00 5.87153870e+00 5.80203137e+00 5.72548981e+00
 5.63701943e+00 5.55023562e+00 5.41884912e+00 5.43014413e+00
 5.40949472e+00 5.39395253e+00 5.39556325e+00 5.40566753e+00
 5.40816156e+00 5.41960713e+00 5.46053288e+00 5.50326211e+00
 5.54389549e+00 5.57925313e+00 5.60411490e+00 5.61495217e+00
 5.64154431e+00 5.63311832e+00 5.66709177e+00 5.70212131e+00
 5.73577936e+00 5.76720924e+00 5.75928480e+00 5.74415494e+00
 5.68893055e+00 5.61483025e+00 5.53251450e+00 5.45828573e+00
 5.38190263e+00 5.30128364e+00 5.18955255e+00 5.08301144e+00
 4.94673757e+00 4.81390995e+00 4.68377287e+00 4.52863274e+00
 4.37394824e+00 4.20635460e+00 3.96916033e+00 3.74935065e+00
 3.53355257e+00 3.32650879e+00 3.13176899e+00 2.95497306e+00
 2.77629701e+00 2.56756711e+00 2.34594962e+00 2.13923899e+00
 1.94520510e+00 1.75828523e+00 1.58571152e+00 1.42905340e+00
 1.28182042e+00 1.13054899e+00 9.87591102e-01 8.59099246e-01
 7.41718468e-01 6.35153261e-01 5.31116826e-01 4.30474342e-01
 3.35823190e-01 2.54042910e-01 1.84321455e-01 1.24075448e-01
 7.49932416e-02 3.70266974e-02 1.14093666e-02 5.86167834e-04
 3.18619526e-03 1.90846729e-02 4.93830549e-02 9.51975247e-02
 1.61132480e-01 2.46430974e-01 3.47520025e-01 4.64852887e-01
 5.94351587e-01 7.41454499e-01 9.10099776e-01 1.10633158e+00
 1.32936308e+00 1.57313979e+00 1.83306451e+00 2.11128072e+00
 2.40597085e+00 2.73495323e+00 3.08780958e+00 3.45166251e+00
 3.85347416e+00 4.26521161e+00 4.67879082e+00 5.10089197e+00
 5.52588650e+00 5.97485930e+00 6.45381329e+00 6.95971938e+00
 7.47433167e+00 7.99419332e+00 8.51173779e+00 9.02547206e+00
 9.55499680e+00 1.00931410e+01 1.06320165e+01 1.11399823e+01
 1.16403938e+01 1.21177340e+01 1.25427717e+01 1.29650559e+01
 1.33611979e+01 1.37226309e+01 1.40591796e+01 1.43657539e+01
 1.46419435e+01 1.49119969e+01 1.51443173e+01 1.53600689e+01
 1.55532234e+01 1.57099667e+01 1.58562417e+01 1.59624981e+01
 1.60333203e+01 1.60698708e+01 1.60949335e+01 1.60963313e+01
 1.61043749e+01 1.61043615e+01 1.60939212e+01 1.60856693e+01
 1.60520395e+01 1.59892543e+01 1.59034067e+01 1.58237388e+01
 1.57298637e+01 1.56336464e+01 1.55402365e+01 1.54154575e+01
 1.52842891e+01 1.51294925e+01 1.49830975e+01 1.48250780e+01
 1.46510091e+01 1.44624929e+01 1.42517759e+01 1.40373856e+01
 1.37871237e+01 1.35490915e+01 1.33035565e+01 1.30807841e+01
 1.28781122e+01 1.26651129e+01 1.24605451e+01 1.22379582e+01
 1.20369012e+01 1.18645337e+01 1.17195949e+01 1.15776401e+01
 1.14384999e+01 1.13104616e+01 1.11845736e+01 1.11163613e+01
 1.10640489e+01 1.10291121e+01 1.09768411e+01 1.08976345e+01
 1.08143717e+01 1.07148878e+01 1.06207674e+01 1.05227977e+01
 1.04171955e+01 1.02854035e+01 1.00754343e+01 9.82998444e+00
 9.61342015e+00 9.40290093e+00 9.18741557e+00 8.97073335e+00
 8.76334604e+00 8.57442524e+00 8.38288516e+00 8.22960763e+00
 8.07555185e+00 7.92410986e+00 7.79300062e+00 7.68479609e+00
 7.57746885e+00 7.44910486e+00 7.25059246e+00 7.05046148e+00
 6.81848373e+00 6.56521491e+00 6.29111534e+00 5.98306739e+00
 5.64831205e+00 5.27251229e+00 4.91103078e+00 4.56398783e+00
 4.21928757e+00 3.89018193e+00 3.57625434e+00 3.29296337e+00
 3.04596963e+00 2.80845654e+00 2.57495088e+00 2.34712281e+00
 2.16943734e+00 2.01903371e+00 1.88478694e+00 1.77535365e+00
 1.66922045e+00 1.55986887e+00 1.46271276e+00 1.41118618e+00
 1.38731424e+00 1.36891313e+00 1.35873790e+00 1.34934085e+00
 1.34600848e+00 1.35094794e+00 1.30335548e+00 1.23061847e+00
 1.15930986e+00 1.09034424e+00 1.02442958e+00 9.69735074e-01
 9.29766526e-01 9.03907799e-01 8.82179404e-01 8.61778448e-01
 8.46936466e-01 8.36921688e-01 8.38470942e-01 8.36491617e-01
 8.74549934e-01 9.27723124e-01 9.88026699e-01 1.05286308e+00
 1.12322344e+00 1.19280217e+00 1.26878286e+00 1.34896432e+00
 1.42965166e+00 1.51505646e+00 1.61109276e+00 1.71330562e+00
 1.83298841e+00 1.95617785e+00 2.05693005e+00 2.15452080e+00
 2.25932117e+00 2.37767598e+00 2.50545774e+00 2.63246010e+00
 2.75795840e+00 2.90167137e+00 3.05501387e+00 3.20928169e+00
 3.36088148e+00 3.51378748e+00 3.66891741e+00 3.83047719e+00
 3.99781043e+00 4.16564136e+00 4.32453074e+00 4.46558397e+00
 4.61520442e+00 4.77323001e+00 4.93910912e+00 5.12452223e+00
 5.31215913e+00 5.49611326e+00 5.67463173e+00 5.86182055e+00
 6.05867600e+00 6.24883894e+00 6.47652356e+00 6.70327271e+00
 6.93629371e+00 7.17791695e+00 7.41479201e+00 7.64436438e+00
 7.86604981e+00 8.10535167e+00 8.33791810e+00 8.57762904e+00
 8.82272894e+00 9.06338424e+00 9.27449584e+00 9.47728403e+00
 9.69953325e+00 9.92725642e+00 1.01781123e+01 1.04747180e+01
 1.08026122e+01 1.11181103e+01 1.14454265e+01 1.18008603e+01
 1.21593910e+01 1.25419908e+01 1.29466840e+01 1.33403436e+01
 1.37310052e+01 1.41334328e+01 1.45444561e+01 1.49682111e+01
 1.53916932e+01 1.58407942e+01 1.62941142e+01 1.67350356e+01
 1.71775326e+01 1.76505618e+01 1.81335674e+01 1.85996319e+01
 1.90305758e+01 1.94611705e+01 1.98906879e+01 2.03349476e+01
 2.08180327e+01 2.12960032e+01 2.17619736e+01 2.21703548e+01
 2.25352626e+01 2.28847947e+01 2.32462726e+01 2.36125521e+01
 2.39900094e+01 2.43899189e+01 2.48078594e+01 2.52037908e+01
 2.55759040e+01 2.59500129e+01 2.63384663e+01 2.67165465e+01
 2.72162445e+01 2.78188509e+01 2.83988511e+01 2.89746346e+01
 2.95913022e+01 3.02258545e+01 3.08154800e+01 3.14702995e+01
 3.21436912e+01 3.28019322e+01 3.34538940e+01 3.40795622e+01
 3.46690236e+01 3.52375896e+01 3.57675679e+01 3.62307893e+01
 3.66866702e+01 3.71536199e+01 3.76468510e+01 3.81086840e+01
 3.85550335e+01 3.88364394e+01 3.89732191e+01 3.91435010e+01
 3.93625492e+01 3.95275327e+01 3.96704838e+01 3.97952052e+01
 3.99115289e+01 4.00068853e+01 4.00318636e+01 4.00419634e+01
 3.99677524e+01 3.98732058e+01 3.97437350e+01 3.95496522e+01
 3.92549224e+01 3.89541787e+01 3.86291927e+01 3.81671957e+01
 3.76826230e+01 3.72624563e+01 3.68852932e+01 3.65185570e+01
 3.61773609e+01 3.58247015e+01 3.53731026e+01 3.49327060e+01
 3.45234835e+01 3.40972865e+01 3.36682549e+01 3.32360027e+01
 3.28061952e+01 3.23035133e+01 3.17856435e+01 3.12699165e+01
 3.06541909e+01 2.99560366e+01 2.92592009e+01 2.85939581e+01
 2.78844927e+01 2.71796907e+01 2.64904479e+01 2.58371464e+01
 2.51986197e+01 2.45350911e+01 2.38860848e+01 2.32614569e+01
 2.26529412e+01 2.20561406e+01 2.15657109e+01 2.10952735e+01
 2.06243232e+01 2.01557717e+01 1.96936204e+01 1.92350272e+01
 1.87836182e+01 1.82690256e+01 1.77392861e+01 1.72135600e+01
 1.67166573e+01 1.62423734e+01 1.57813520e+01 1.53556034e+01
 1.50294414e+01 1.47159362e+01 1.43982653e+01 1.40783634e+01
 1.37317445e+01 1.33694925e+01 1.30132328e+01 1.27267447e+01
 1.24426180e+01 1.21567547e+01 1.18726382e+01 1.16091657e+01
 1.13417652e+01 1.10699932e+01 1.07566873e+01 1.04496765e+01
 1.01482333e+01 9.83958745e+00 9.53466381e+00 9.23130658e+00
 8.92703337e+00 8.58862097e+00 8.26728260e+00 7.95670895e+00
 7.66665787e+00 7.38935581e+00 7.11831307e+00 6.85414265e+00
 6.62169931e+00 6.40342488e+00 6.18572599e+00 5.94533290e+00
 5.69441103e+00 5.45540542e+00 5.22417348e+00 5.01038414e+00
 4.80314185e+00 4.59873301e+00 4.41894826e+00 4.25236163e+00
 4.09211614e+00 3.93985142e+00 3.79161369e+00 3.65889356e+00
 3.53426534e+00 3.45995234e+00 3.42185200e+00 3.38530032e+00
 3.35563741e+00 3.33551310e+00 3.31901411e+00 3.30099897e+00
 3.26587147e+00 3.22245750e+00 3.18020125e+00 3.14444652e+00
 3.10761137e+00 3.06706634e+00 3.03173545e+00 3.00842423e+00
 2.98892338e+00 2.97242086e+00 2.96317816e+00 2.95526681e+00
 2.95197025e+00 2.95095336e+00 2.91656547e+00 2.87375078e+00
 2.83032657e+00 2.78954025e+00 2.74974445e+00 2.71356520e+00
 2.67957732e+00 2.64322478e+00 2.60252285e+00 2.55589585e+00
 2.52666676e+00 2.50371134e+00 2.47960913e+00 2.45779894e+00
 2.47280133e+00 2.49113418e+00 2.51173306e+00 2.53293417e+00
 2.56875794e+00 2.61385188e+00 2.65882646e+00 2.70939937e+00
 2.75307572e+00 2.80420858e+00 2.86825171e+00 2.94381329e+00
 3.03326154e+00 3.12023211e+00 3.22559113e+00 3.33341924e+00
 3.44335974e+00 3.52525923e+00 3.62432368e+00 3.73135184e+00
 3.83608367e+00 3.98403379e+00 4.13598914e+00 4.29180884e+00
 4.45916609e+00 4.63020982e+00 4.79316727e+00 4.95962483e+00
 5.14060172e+00 5.33052067e+00 5.52808811e+00 5.74339041e+00
 5.98966064e+00 6.25378754e+00 6.53734937e+00 6.86876592e+00
 7.21178375e+00 7.56977006e+00 7.93419881e+00 8.29464891e+00
 8.67282901e+00 9.07607656e+00 9.52699421e+00 9.99081099e+00
 1.04740959e+01 1.09748347e+01 1.15209697e+01 1.20931277e+01
 1.26775877e+01 1.32748853e+01 1.38959751e+01 1.45242790e+01
 1.51736080e+01 1.58349047e+01 1.65081661e+01 1.72116811e+01
 1.79603309e+01 1.87307632e+01 1.94978361e+01 2.02815202e+01
 2.10967974e+01 2.19522016e+01 2.28260943e+01 2.37303573e+01
 2.46475715e+01 2.55625139e+01 2.64997934e+01 2.75363004e+01
 2.86207792e+01 2.97398791e+01 3.09008314e+01 3.20691255e+01
 3.32038549e+01 3.44297488e+01 3.57923220e+01 3.71952146e+01
 3.86686328e+01 4.02080995e+01 4.17606220e+01 4.32993641e+01
 4.48735061e+01 4.63917630e+01 4.78879494e+01 4.93417175e+01
 5.07718581e+01 5.18494892e+01 5.25821632e+01 5.32415836e+01
 5.39111011e+01 5.45360500e+01 5.50233978e+01 5.54890527e+01
 5.59971710e+01 5.64783110e+01 5.69079934e+01 5.72780591e+01
 5.75763720e+01 5.81198379e+01 5.87683590e+01 5.93917589e+01
 5.99797489e+01 6.05250266e+01 6.09022193e+01 6.11864022e+01
 6.13578342e+01 6.14610003e+01 6.15120966e+01 6.15161472e+01
 6.14868954e+01 6.15806675e+01 6.16927574e+01 6.17393806e+01
 6.17431446e+01 6.18210266e+01 6.18819455e+01 6.17568734e+01
 6.16849330e+01 6.16368109e+01 6.14297598e+01 6.11627963e+01
 6.08857737e+01 6.10972185e+01 6.13611114e+01 6.16769453e+01
 6.19896569e+01 6.23512543e+01 6.26878915e+01 6.34410383e+01
 6.41954044e+01 6.49139340e+01 6.53751574e+01 6.57066071e+01
 6.60364084e+01 6.57027021e+01 6.50506432e+01 6.43562828e+01
 6.36360823e+01 6.25155921e+01 6.12537816e+01 5.98953071e+01
 5.85360999e+01 5.71927306e+01 5.58508140e+01 5.45082451e+01
 5.33392744e+01 5.22630552e+01 5.10130251e+01 4.99315798e+01
 4.91105791e+01 4.82845366e+01 4.74247878e+01 4.68647619e+01
 4.63982826e+01 4.57531615e+01 4.50363370e+01 4.42717720e+01
 4.35164763e+01 4.27953516e+01 4.20296982e+01 4.12600648e+01
 4.05553449e+01 3.98527956e+01 3.91539216e+01 3.84427948e+01
 3.77273909e+01 3.69191482e+01 3.61415547e+01 3.55714316e+01
 3.50807843e+01 3.46481584e+01 3.42062233e+01 3.37636275e+01
 3.32777352e+01 3.28248262e+01 3.24965343e+01 3.22070838e+01
 3.19053402e+01 3.15901428e+01 3.12669519e+01 3.08279517e+01
 3.02528571e+01 2.94804218e+01 2.87194101e+01 2.79526977e+01
 2.71732817e+01 2.63931762e+01 2.58591893e+01 2.53718748e+01
 2.48568862e+01 2.43126080e+01 2.37600022e+01 2.32021462e+01
 2.26416115e+01 2.21241862e+01 2.17092572e+01 2.14131331e+01
 2.11332122e+01 2.08467335e+01 2.05520160e+01 2.02505589e+01
 1.99852426e+01 1.97515853e+01 1.95316499e+01 1.92958160e+01
 1.90527845e+01 1.88020967e+01 1.85443562e+01 1.82979736e+01
 1.80862977e+01 1.78882416e+01 1.76615586e+01 1.74339428e+01
 1.72038038e+01 1.69694665e+01 1.66681157e+01 1.63980952e+01
 1.61535593e+01 1.59024758e+01 1.56469423e+01 1.53927924e+01
 1.51380223e+01 1.47411836e+01 1.42273891e+01 1.36765716e+01
 1.31235897e+01 1.25756775e+01 1.20307877e+01 1.14933920e+01
 1.10754543e+01 1.07189044e+01 1.03541232e+01 9.98016798e+00
 9.60355446e+00 9.22910994e+00 8.85776039e+00 8.57296104e+00
 8.40289880e+00 8.29099918e+00 8.19121033e+00 8.08978625e+00
 7.98378917e+00 7.86875139e+00 7.77035852e+00 7.67586003e+00
 7.57606824e+00 7.47409216e+00 7.36859367e+00 7.26110594e+00
 7.15156738e+00 7.00487125e+00 6.85266661e+00 6.72059912e+00
 6.58765296e+00 6.45262722e+00 6.31407341e+00 6.17177293e+00
 6.08253598e+00 5.93278014e+00 5.78097980e+00 5.62808548e+00
 5.47385697e+00 5.31831264e+00 5.16013846e+00 5.02794730e+00
 5.00399683e+00 4.96226260e+00 4.91543524e+00 4.86384175e+00
 4.80987274e+00 4.75216396e+00 4.69674032e+00 4.66898115e+00
 4.59808484e+00 4.52544796e+00 4.45142860e+00 4.37302041e+00
 4.29189486e+00 4.21740982e+00 4.17368413e+00 4.15451539e+00
 4.13477445e+00 4.11509374e+00 4.09222951e+00 4.06700213e+00
 4.00519965e+00 3.93059924e+00 3.87808279e+00 3.82733267e+00
 3.77428840e+00 3.71665959e+00 3.65763096e+00 3.61463478e+00
 3.58091530e+00 3.54061898e+00 3.49551000e+00 3.44905618e+00
 3.39781957e+00 3.34325984e+00 3.30067637e+00 3.24536886e+00
 3.18440091e+00 3.12154140e+00 3.05836805e+00 2.99422811e+00
 2.92638299e+00 2.87667686e+00 2.82364327e+00 2.76395699e+00
 2.69867099e+00 2.62979395e+00 2.55752397e+00 2.48441905e+00
 2.40910269e+00 2.33399262e+00 2.25586306e+00 2.17239936e+00
 2.08509607e+00 1.98977391e+00 1.89387005e+00 1.81403623e+00
 1.74631075e+00 1.67575630e+00 1.60306986e+00 1.52416354e+00
 1.44775846e+00 1.37374029e+00 1.30404616e+00 1.23358889e+00
 1.16107986e+00 1.08889523e+00 1.01824818e+00 9.48110756e-01
 8.78898502e-01 8.18011492e-01 7.50539123e-01 6.84982090e-01
 6.23767524e-01 5.67171290e-01 5.17540263e-01 4.70646147e-01
 4.28933895e-01 3.92091277e-01 3.56875885e-01 3.22388985e-01
 2.90598822e-01 2.66315669e-01 2.47322322e-01 2.38296823e-01
 2.33477400e-01 2.28739369e-01 2.24620524e-01 2.19820325e-01
 2.15864757e-01 2.07668640e-01 1.97251437e-01 1.87559983e-01
 1.78957577e-01 1.71456415e-01 1.63274877e-01 1.55680003e-01
 1.49644949e-01 1.45020863e-01 1.39007168e-01 1.32376746e-01
 1.27393500e-01 1.24044197e-01 1.22092797e-01 1.20269192e-01
 1.20283098e-01 1.20142322e-01 1.19367160e-01 1.16857301e-01
 1.14886479e-01 1.13533736e-01 1.12142258e-01 1.11947219e-01
 1.12919412e-01 1.14000588e-01 1.15454075e-01 1.16833793e-01
 1.17698329e-01 1.19778799e-01 1.13964528e-01 1.08015382e-01
 1.02474344e-01 9.70847269e-02 9.21218648e-02 8.74890276e-02]
SPM{F} inference field
   SPM.effect    :   Main A
   SPM.z         :  (1x1000) raw test stat field
   SPM.df        :  (1.791, 112.930)
   SPM.fwhm      :  136.03377
   SPM.resels    :  (1, 7.34376)
Inference:
   SPM.alpha     :  0.050
   SPM.zstar     :  6.57115
   SPM.h0reject  :  True
   SPM.p_set     :  <0.001
   SPM.p_cluster :  (0.007, <0.001, <0.001)
