# Supplementary material for: The Application of Statistical Parametric Mapping to Evaluate Differences in Topspin Backhand between Chinese and Polish Female Table Tennis Players
Source: Appl Bionics Biomech. 2021 Jul 14;2021:5555874. doi: 10.1155/2021/5555874 (PMC8339346; doi:10.1155/2021/5555874)
Supplement: Supplementary Materials — Angles and accelerations. [file 5555874.f1.zip › Ankle LT-Inversion (deg) cykleSPM.txt]

[123.44299691 123.43535648 123.36565873 123.2453452  123.05381008
 122.78671953 122.43875409 122.07424138 121.70663768 121.31428352
 120.89534395 120.47998499 120.08786958 119.62677826 119.18426843
 118.79015895 118.37987079 117.96752384 117.56492619 117.15655937
 116.73765791 116.37966515 116.04550565 115.68343476 115.3065071
 114.92106354 114.53654673 114.16716943 113.83678983 113.55076422
 113.25111702 112.94416117 112.64446377 112.3544833  112.12451125
 112.03667034 112.00362201 111.92670786 111.79771381 111.63020601
 111.43467457 111.20530075 111.10270997 111.06836585 111.00843352
 110.92876345 110.82409594 110.68607365 110.50026263 110.3437442
 110.18753571 109.97116189 109.69109943 109.36205803 108.9992511
 108.59069659 108.24378986 107.63325906 106.94177534 106.17728019
 105.33101669 104.41289903 103.41763455 102.5432844  101.6544585
 100.73694778  99.80909153  98.84991623  97.85618041  96.84819086
  96.01543742  96.00576767  95.93615661  95.7813782   95.57301432
  95.31793922  95.0773418   94.7360666   94.30395782  93.73063836
  93.06629263  92.31616486  91.50884344  90.64869734  89.80842899
  89.03617262  88.20711445  87.33283707  86.42310786  85.47650993
  84.43974468  83.82734883  83.29465151  82.71164569  82.03627968
  81.30404389  80.53155959  79.70232371  79.68009104  79.69269766
  79.53472461  79.21476569  78.74214123  78.03562177  77.31745845
  76.25294071  75.14409326  73.95493191  72.6352429   71.21928927
  69.7174537   68.07630761  66.2982593   64.84737864  63.24602743
  61.55376877  59.81608305  58.12521346  56.38269975  54.84189775
  53.80682095  52.68747947  51.52276748  50.32349355  49.07958598
  48.3067644   48.12308414  47.65830371  47.15724157  46.64683815
  46.15362887  45.58664511  45.73287479  46.13323791  46.68452123
  47.15543126  47.55166729  47.83221177  47.79989587  47.39800668
  47.26753191  47.55044087  47.74024987  47.84064692  47.79333738
  47.65054251  47.25874129  47.00783807  46.7782552   46.48606901
  46.17486882  45.81841878  45.49798235  45.3121708   45.15156916
  44.81786492  44.53859299  44.15425395  43.69630007  43.37296416
  43.38396824  43.42109336  43.63885776  43.79351164  43.87790847
  43.89952099  43.87833052  43.89827829  44.00684619  44.17891808
  44.36502839  44.58819032  44.77255184  44.89285745  45.07680364
  45.33538089  45.89064692  46.45649311  47.07557783  47.73330063
  48.35757182  49.03240388  49.74751215  50.55528427  51.34678098
  52.06495151  52.6421913   53.12485244  53.53133583  54.00066143
  54.73807707  55.5012946   56.23633371  56.95486926  57.64946781
  58.37284016  59.09623997  59.86418122  60.62806985  61.38867442
  62.1219468   62.94990739  63.82029244  64.67642699  65.54972734
  66.45432804  67.32675     68.15287298  68.91312765  69.79407966
  70.70373439  71.60187268  72.46086917  73.24687308  73.93703784
  74.46653791  75.07660303  75.73428179  76.37559378  76.95785688
  77.46474242  77.95174518  78.43581668  79.12165229  79.87221717
  80.6260628   81.3203317   82.00171787  82.60631909  83.14334729
  83.83558935  84.60656233  85.52656683  86.42830776  87.2944349
  88.13293936  88.93047313  89.65799922  90.44063645  91.4175271
  92.36501905  93.29479066  94.17802026  95.04753867  95.89943285
  96.73009378  97.61111676  98.55504432  99.44879993 100.32407331
 101.22578375 102.09088558 103.05247732 104.15231822 105.26478551
 106.34989666 107.53612351 108.76617725 110.05110567 111.37042075
 112.62055384 113.89112465 115.15135386 116.54017651 117.92935896
 119.36473861 120.82550626 122.2792872  123.78771082 125.21157143
 126.49788209 127.73222135 128.80720223 129.79624697 130.74654949
 131.78003062 132.67290388 133.36935599 133.95908523 134.36086703
 134.65374329 134.81272918 134.76815562 134.58149869 134.241454
 133.92993606 134.06587431 134.25104778 134.83401012 135.24826025
 135.55001868 135.80039197 136.07437033 136.4319949  136.6490908
 137.38924903 137.99852053 138.48181502 138.71939132 139.09793142
 140.09431448 141.05189732 142.02976985 142.86178792 143.81581361
 145.11803307 146.71721734 148.38809842 149.90909909 151.47931925
 153.24673768 155.15411264 156.94311378 158.48126601 159.8596199
 161.15430063 162.64365071 164.03321428 165.34389392 166.46867246
 166.94575146 166.87068396 166.14398804 164.69859495 162.95914586
 161.06879974 158.328857   155.75178937 152.9634706  149.63077339
 145.85166643 141.76393681 137.11875074 132.74183128 129.40136163
 126.73483763 123.87450955 121.44260749 118.84641991 116.61713101
 114.76457977 113.53250038 112.63124984 111.95526314 111.58520188
 111.352499   111.45852953 111.806252   113.07043819 114.47786111
 116.14070403 117.73429216 119.17572549 120.19354599 121.4962539
 122.57814179 123.34599579 123.79454486 124.04299366 124.33776484
 125.00264296 124.93298995 124.87254226 124.56833603 124.41563921
 124.69750512 124.80712569 124.63367482 124.54050959 125.42543091
 126.59367259 127.83080015 129.05372874 130.18567359 131.32006103
 132.74395957 134.30009134 135.65887842 136.99686311 138.43926333
 139.88441208 141.33345728 142.5676122  143.44779726 144.23497449
 145.04870879 145.95726071 146.90724564 147.62200354 147.99082434
 148.17735737 148.26586144 148.31240458 148.32547317 148.2432251
 147.79839842 147.38144899 147.07705876 146.5649785  146.0665145
 145.58903153 145.02730342 144.26264685 143.40953257 142.68092418
 141.89186626 141.03114551 140.12569979 139.20182837 138.53156311
 137.96760675 137.63219141 137.30805057 136.84138342 136.31476252
 135.81465071 135.4983917  135.21240257 135.00553126 134.85630976
 134.74293354 134.56419665 134.47054944 134.494359   134.39901664
 134.27208753 134.10426949 134.09689854 134.2820935  134.49271085
 134.70417261 134.83850555 134.91869671 134.95807625 135.33689471
 136.14994683 136.91933204 137.54964362 138.17942131 138.77773248
 139.32506638 139.7701098  140.16065436 140.45878709 140.71012677
 140.91588335 141.00524899 141.00950587 141.04369656 141.00184818
 140.83725099 140.59319194 140.30641894 139.968417   139.55370517
 139.05186308 138.40011728 137.66406081 136.89424703 136.05860442
 135.06474348 133.99728244 132.83905895 131.70429695 130.48841176
 129.18184707 127.99156818 126.67424265 125.2872712  124.17626007
 123.53982936 123.01994656 122.73733917 122.52484505 122.27487285
 122.00231544 121.7558977  121.34839786 120.70638734 120.10272296
 119.68221174 119.28874255 118.87556516 118.30233989 117.59589714
 116.89280265 116.17673136 115.6904023  115.27394341 114.82981286
 114.43021874 114.08124993 113.73498423 113.32903417 113.10048286
 113.10334584 113.27463819 113.60606223 114.08260999 114.42371049
 114.61175711 114.54421738 114.27894116 113.87367576 113.46332622
 113.05089555 112.60842598 112.07258842 111.43413278 110.74299868
 109.95655477 109.6209978  109.52374904 109.39418424 109.28953245
 109.11828683 108.9758895  108.81991142 108.70638206 108.56614479
 108.36876849 108.13755648 107.81348728 107.46833936 107.1254497
 106.70428381 106.22701592 105.78771814 105.28888585 104.78527253
 104.25184972 103.75711847 103.10767669 102.36468103 101.55059641
 100.8876462  100.59477386 100.22342355  99.80468212  99.28552133
  98.68853834  98.02638824  97.33428361  96.67698851  95.94160726
  95.16383267  94.36929596  93.54030446  92.66300905  91.73191805
  90.8464183   89.9425205   89.10701508  88.40674911  87.70402101
  86.94198414  86.26955898  85.64047654  85.00457568  84.41173377
  83.99566152  83.58763103  83.1659467   82.84003836  82.56012499
  82.30435957  82.05188225  81.89698669  81.78563275  81.67958795
  81.51578156  81.34215529  81.15710762  80.93300545  80.6483211
  80.32909629  79.99533558  79.63147571  79.23451022  78.78669915
  78.26916737  77.72536986  77.10155293  76.46602892  76.79182928
  77.49188263  78.14767004  78.74404878  79.21361205  79.5929228
  79.88709606  80.03459656  80.11705142  80.16022179  80.2010347
  80.25378343  80.31576322  80.34726549  80.48987344  80.60271859
  80.61227014  80.58173478  80.67626578  80.74388169  80.71486821
  80.62550798  80.48039551  80.28249017  80.1123586   80.0270465
  79.96558885  79.837564    80.07762358  80.37263488  80.59083648
  80.78269318  80.88695554  80.92131541  80.92449605  80.96436445
  81.06327565  81.16998441  81.24625825  81.26473246  81.21413371
  81.12756235  81.1029995   81.05441921  81.02309564  81.15676262
  81.25023829  81.32782718  81.61241428  81.92393882  82.20268387
  82.47228946  82.68145597  82.92531625  83.31417721  83.68391542
  84.13076444  84.5188811   84.85816852  85.15522354  85.39908834
  85.62730419  85.81655082  86.08780297  86.33432186  86.55168255
  86.75599461  87.01976097  87.27885237  87.50925656  87.71533014
  87.8601584   87.95096144  88.00524238  88.0968383   88.18246557
  88.2367531   88.26870949  88.23366632  88.1720623   88.07977942
  88.01285639  87.9178357   87.82532948  87.78540983  87.68341229
  87.56421892  87.42221795  87.26012918  87.10138238  86.93688777
  86.84712619  86.74495931  86.64571295  86.52546153  86.47497298
  86.42357902  86.41441971  86.44529384  86.4437644   86.40688315
  86.471067    86.8470594   87.29787967  87.77779994  88.25849801
  88.69263196  89.31581922  90.0612564   90.973538    91.89705222
  92.70700872  93.38504117  93.92713185  94.36948945  94.72669895
  95.02046588  95.24310562  95.38826215  95.53122033  95.65104148
  95.72827562  95.7684083   95.71739987  95.60192992  95.45221316
  95.24701126  95.00192596  94.7116233   94.36288552  93.98136264
  93.43624765  92.90032382  92.32255579  91.65174958  90.88720593
  90.02364937  89.6101487   89.31574977  89.12464984  88.93034078
  88.73199301  88.50458224  88.91164134  89.4734135   89.9797243
  90.4699727   90.91032428  91.35378149  91.4064263   91.37053862
  91.2774585   91.1370992   90.96556203  90.75755088  90.12145378
  89.33856643  88.47380956  87.69695903  86.90573039  86.02207111
  85.68192683  85.31408919  84.8851735   84.40451014  83.82396943
  83.15950304  82.57751473  81.95760946  81.34322401  80.70062593
  80.01227658  79.6371471   79.38028674  79.32137673  79.23991444
  79.14666963  79.01912744  78.86801559  78.8425189   78.81020083
  78.80766587  78.7436142   78.61539881  78.43971801  78.19793472
  77.74735196  77.21429861  76.6822197   76.11072771  75.51218479
  74.92833603  74.3008483   73.65254472  72.95320572  72.2327435
  71.57467677  70.87532347  70.11334146  69.30272677  68.80724475
  68.49638514  68.44492131  68.42845269  68.38352663  68.28900175
  68.1329069   68.05713593  68.06308375  68.22352038  68.41531069
  68.52898343  68.54293859  68.45299567  68.36581401  68.19997896
  67.96791182  67.69610698  67.35426152  66.95459147  66.50944536
  66.00818489  65.58388051  65.29539694  64.88471332  64.43372386
  63.96292796  63.4695987   62.95993518  62.41498382  61.801991
  61.13048406  60.41103043  59.65089413  58.8430047   58.25901441
  57.63162039  56.9139677   56.15768455  55.36276702  54.52944049
  53.65663348  52.87510228  52.2670831   51.78006059  51.30151207
  50.77219425  50.20422194  49.58968512  48.88778131  48.96629206
  49.45801143  49.93520227  50.3775074   50.78270772  51.14823663
  51.65212154  52.02003141  52.38561087  52.76264282  53.09592939
  53.386567    53.6402241   54.14278051  54.42709194  54.48118664
  54.43754399  54.35651775  54.2118052   54.00528732  53.74214728
  53.58473656  53.30102463  52.85996016  52.25672368  51.50686497
  50.59274111  50.22044173  50.44649209  50.65586814  50.79235106
  50.85156902  50.82573903  50.72345413  50.72702867  50.81713801
  50.93731018  50.92245343  50.78174209  50.53122093  50.15881258
  49.86929228  49.76668424  49.65636541  49.5263592   49.37232543
  49.20093268  49.01888344  48.8936048   49.02799879  49.13113508
  49.22222246  49.26800243  49.28194042  49.24737192  49.33362409
  49.71549012  50.17390509  50.57905973  50.91517997  51.18098446
  51.36318784  51.75321715  52.1515859   52.54543372  52.95933916
  53.3629182   53.76192018  54.16244315  54.52825508  54.85867378
  55.14262751  55.41427702  55.67547156  55.94671158  56.18652306
  56.38766714  56.70500651  57.08479619  57.45463656  57.83327569
  58.24544649  58.66399123  59.09827067  59.69133433  60.33829834
  61.00147424  61.75199657  62.54415139  63.33662076  64.15842631
  65.0177724   65.85963521  66.7170516   67.60030485  68.51904986
  69.50522422  70.52095091  71.56868344  72.6096394   73.67149728
  74.69209558  75.64082789  76.54730511  77.46001353  78.33631763
  79.17743643  79.99139448  80.79674973  81.46552411  81.95682214
  82.57518823  83.03706485  83.42577315  83.79021743  84.21121635
  84.60753895  84.97255504  85.38382741  85.79622494  86.18647735
  86.46673323  86.62895422  86.85073072  87.16789294  87.71152375
  88.58753415  89.44631179  90.33014136  91.15161748  91.9764519
  92.93399339  94.05222131  95.18271698  96.28362202  97.36303617
  98.46227671  99.54215882 100.58158925 101.68366275 102.68159289
 103.63498012 104.61823281 105.62564855 106.61478865 107.58434039
 108.58482594 109.51605592 110.38497013 111.21260023 111.98621873
 112.70079362 113.39290856 114.17389585 114.95704066 115.70775584
 116.43907003 117.10350928 117.71568186 118.32702477 118.89146323
 119.37424175 119.83052327 120.26027061 120.61838188 120.92721424]
SPM{F} inference field
   SPM.effect    :   Main A
   SPM.z         :  (1x1000) raw test stat field
   SPM.df        :  (1.415, 98.634)
   SPM.fwhm      :  94.67735
   SPM.resels    :  (1, 10.55163)
Inference:
   SPM.alpha     :  0.050
   SPM.zstar     :  8.13719
   SPM.h0reject  :  True
   SPM.p_set     :  <0.001
   SPM.p_cluster :  (<0.001)
