# Supplementary material for: The Application of Statistical Parametric Mapping to Evaluate Differences in Topspin Backhand between Chinese and Polish Female Table Tennis Players
Source: Appl Bionics Biomech. 2021 Jul 14;2021:5555874. doi: 10.1155/2021/5555874 (PMC8339346; doi:10.1155/2021/5555874)
Supplement: Supplementary Materials — Angles and accelerations. [file 5555874.f1.zip › Ankle RT-Abduction (deg) cykleSPM.txt]

[2.09309903e+01 2.09114440e+01 2.08894265e+01 2.08657770e+01
 2.08366301e+01 2.07985488e+01 2.07566961e+01 2.06780274e+01
 2.05552914e+01 2.04253914e+01 2.02953305e+01 2.01545804e+01
 1.99926160e+01 1.98145815e+01 1.96317811e+01 1.94242825e+01
 1.92157188e+01 1.89970273e+01 1.87632327e+01 1.85216712e+01
 1.82792855e+01 1.80353161e+01 1.78096320e+01 1.75873214e+01
 1.73645594e+01 1.71251305e+01 1.68844695e+01 1.66420915e+01
 1.63892366e+01 1.61555387e+01 1.59164845e+01 1.56851767e+01
 1.54515296e+01 1.52126082e+01 1.49773267e+01 1.47703002e+01
 1.46189965e+01 1.44743608e+01 1.43277632e+01 1.41774685e+01
 1.40243215e+01 1.38541411e+01 1.36817091e+01 1.35485514e+01
 1.34086559e+01 1.32621867e+01 1.31091332e+01 1.29509768e+01
 1.27945360e+01 1.26395924e+01 1.24705478e+01 1.22881984e+01
 1.21002586e+01 1.19053885e+01 1.16925068e+01 1.14770146e+01
 1.12445740e+01 1.09922804e+01 1.07385025e+01 1.04898439e+01
 1.02206118e+01 9.92714602e+00 9.64630412e+00 9.38707051e+00
 9.12935005e+00 8.87278464e+00 8.61889552e+00 8.36758822e+00
 8.12042991e+00 7.88952823e+00 7.63921890e+00 7.42028670e+00
 7.22396185e+00 7.06107505e+00 6.89802851e+00 6.73819072e+00
 6.59627237e+00 6.44951588e+00 6.31138335e+00 6.19339000e+00
 6.07429797e+00 5.95846542e+00 5.84428372e+00 5.74873053e+00
 5.70139056e+00 5.65474574e+00 5.59784127e+00 5.54349499e+00
 5.48969371e+00 5.43696720e+00 5.34309177e+00 5.27309917e+00
 5.19379793e+00 5.10748438e+00 5.01710372e+00 4.92493026e+00
 4.80704207e+00 4.67644405e+00 4.60293515e+00 4.53840145e+00
 4.46962040e+00 4.39938240e+00 4.36326983e+00 4.32646918e+00
 4.22449622e+00 4.01259828e+00 3.76092703e+00 3.50868530e+00
 3.23416489e+00 2.95714748e+00 2.68110125e+00 2.36460551e+00
 2.08775512e+00 1.85422310e+00 1.65221670e+00 1.46642322e+00
 1.28794350e+00 1.11900615e+00 9.66577133e-01 8.65296551e-01
 8.04714940e-01 7.48279468e-01 6.92554637e-01 6.38374066e-01
 5.89160052e-01 5.29135549e-01 4.62581061e-01 3.98612010e-01
 3.40821399e-01 2.88264775e-01 2.40128011e-01 1.95770455e-01
 1.61688099e-01 1.30445405e-01 1.04998544e-01 8.25975814e-02
 6.28639628e-02 4.54788073e-02 3.06837740e-02 2.32221113e-02
 2.05218375e-02 1.81959090e-02 1.55808108e-02 1.33546932e-02
 1.03164731e-02 7.87083717e-03 8.35112843e-03 1.05392651e-02
 1.61068591e-02 2.26311494e-02 3.05165864e-02 3.98672959e-02
 5.37670892e-02 8.09277381e-02 1.16023763e-01 1.60011767e-01
 2.12452512e-01 2.68531643e-01 3.30121972e-01 4.04931036e-01
 5.03947427e-01 6.15756242e-01 7.46433733e-01 8.87781199e-01
 1.03813741e+00 1.20140832e+00 1.36468400e+00 1.54090887e+00
 1.73146363e+00 1.90687367e+00 2.08483977e+00 2.26772989e+00
 2.45939999e+00 2.67196492e+00 2.91871981e+00 3.19889734e+00
 3.48742784e+00 3.77591477e+00 4.05700679e+00 4.33796952e+00
 4.59649103e+00 4.86746468e+00 5.17383740e+00 5.52337236e+00
 5.88414822e+00 6.25126024e+00 6.62852605e+00 7.00071551e+00
 7.39322452e+00 7.82211767e+00 8.31012231e+00 8.81674108e+00
 9.34147387e+00 9.89625088e+00 1.04531341e+01 1.10216119e+01
 1.16158331e+01 1.22628149e+01 1.29385228e+01 1.36437034e+01
 1.43558565e+01 1.50173004e+01 1.57015479e+01 1.63903246e+01
 1.70916478e+01 1.77911090e+01 1.84803065e+01 1.91577002e+01
 1.97805393e+01 2.04097350e+01 2.10070834e+01 2.15166769e+01
 2.20191139e+01 2.24929389e+01 2.29452155e+01 2.34095624e+01
 2.38746129e+01 2.43149872e+01 2.47265869e+01 2.51102617e+01
 2.54740963e+01 2.58647248e+01 2.63074123e+01 2.67374271e+01
 2.71462131e+01 2.74842988e+01 2.78115782e+01 2.80806898e+01
 2.83817227e+01 2.87368379e+01 2.90721631e+01 2.94222067e+01
 2.96941942e+01 2.99961485e+01 3.02999479e+01 3.06399716e+01
 3.10296820e+01 3.13101652e+01 3.16349638e+01 3.19599020e+01
 3.22803234e+01 3.25698253e+01 3.28449875e+01 3.31436943e+01
 3.34242521e+01 3.37412378e+01 3.41403697e+01 3.45786144e+01
 3.49946543e+01 3.54694376e+01 3.59855337e+01 3.65146215e+01
 3.70916792e+01 3.77531524e+01 3.84284341e+01 3.90807175e+01
 3.96791896e+01 4.02782505e+01 4.09919806e+01 4.17777495e+01
 4.26112455e+01 4.34593716e+01 4.43345774e+01 4.51774240e+01
 4.61396593e+01 4.70826205e+01 4.79822434e+01 4.88130295e+01
 4.97028579e+01 5.05812373e+01 5.12546667e+01 5.19042055e+01
 5.25330955e+01 5.29209988e+01 5.32844786e+01 5.35800751e+01
 5.37862808e+01 5.37285996e+01 5.35166554e+01 5.31792928e+01
 5.26965492e+01 5.20848744e+01 5.12734906e+01 5.04096315e+01
 4.94113686e+01 4.83114125e+01 4.72701022e+01 4.63091209e+01
 4.52244033e+01 4.40241155e+01 4.27352373e+01 4.12943256e+01
 3.98146243e+01 3.82468971e+01 3.69020712e+01 3.56610774e+01
 3.43351739e+01 3.29362318e+01 3.16010833e+01 3.03219740e+01
 2.90832715e+01 2.80408679e+01 2.72162481e+01 2.63756717e+01
 2.56610825e+01 2.51296561e+01 2.47061700e+01 2.44695737e+01
 2.43540158e+01 2.40912241e+01 2.37848203e+01 2.35156447e+01
 2.34325094e+01 2.34881052e+01 2.35732285e+01 2.35935089e+01
 2.36990206e+01 2.37595438e+01 2.36889130e+01 2.36772473e+01
 2.36965423e+01 2.36881599e+01 2.36497285e+01 2.36640182e+01
 2.36784857e+01 2.36742790e+01 2.38589333e+01 2.40006527e+01
 2.41515048e+01 2.42149124e+01 2.41252100e+01 2.40616712e+01
 2.41522502e+01 2.41013799e+01 2.39368217e+01 2.37562563e+01
 2.35132151e+01 2.32866370e+01 2.30422642e+01 2.26958895e+01
 2.21355740e+01 2.19912075e+01 2.20448843e+01 2.20542157e+01
 2.21094045e+01 2.21333318e+01 2.21612124e+01 2.18638269e+01
 2.13346310e+01 2.08541925e+01 2.02689753e+01 1.96088205e+01
 1.88560711e+01 1.79352968e+01 1.70056884e+01 1.59911267e+01
 1.50414020e+01 1.41647497e+01 1.34237271e+01 1.27203236e+01
 1.20680210e+01 1.16507261e+01 1.12706596e+01 1.09197156e+01
 1.06399392e+01 1.05050732e+01 1.03764411e+01 1.03031100e+01
 1.03841550e+01 1.04749427e+01 1.05519571e+01 1.06763132e+01
 1.08351889e+01 1.10126394e+01 1.13517214e+01 1.17420579e+01
 1.21266271e+01 1.24996128e+01 1.29567382e+01 1.34904381e+01
 1.39954542e+01 1.45683281e+01 1.51522031e+01 1.57912082e+01
 1.64014259e+01 1.70265275e+01 1.77944288e+01 1.86367097e+01
 1.94788285e+01 2.04019013e+01 2.14837703e+01 2.25651566e+01
 2.36531156e+01 2.47292587e+01 2.58105220e+01 2.69203735e+01
 2.80620449e+01 2.93549755e+01 3.06416590e+01 3.19697278e+01
 3.32905371e+01 3.45522392e+01 3.57712000e+01 3.69098749e+01
 3.83949110e+01 3.99005000e+01 4.14356680e+01 4.29317824e+01
 4.43889229e+01 4.58082091e+01 4.70603954e+01 4.82809851e+01
 4.94331517e+01 5.05439687e+01 5.15843038e+01 5.25695334e+01
 5.34900710e+01 5.44533857e+01 5.54221469e+01 5.62957391e+01
 5.70359143e+01 5.76467531e+01 5.81735476e+01 5.84471184e+01
 5.87446859e+01 5.89538068e+01 5.90438780e+01 5.90157827e+01
 5.89951089e+01 5.89785164e+01 5.88135849e+01 5.85221933e+01
 5.81819815e+01 5.77940345e+01 5.73481315e+01 5.69402571e+01
 5.66775899e+01 5.63651743e+01 5.59050924e+01 5.52874459e+01
 5.46458276e+01 5.39532694e+01 5.31940984e+01 5.24124517e+01
 5.16071901e+01 5.07450445e+01 4.98009419e+01 4.88551364e+01
 4.79427155e+01 4.70375396e+01 4.61701913e+01 4.53281157e+01
 4.46756229e+01 4.41442033e+01 4.36411507e+01 4.32001633e+01
 4.28027075e+01 4.24123421e+01 4.20384285e+01 4.17021793e+01
 4.13873670e+01 4.10588784e+01 4.08297669e+01 4.06509944e+01
 4.04666811e+01 4.03162221e+01 4.03554443e+01 4.04570746e+01
 4.05825262e+01 4.07931129e+01 4.11604983e+01 4.15925802e+01
 4.19830583e+01 4.25814329e+01 4.32384398e+01 4.38834946e+01
 4.45668484e+01 4.53013422e+01 4.60072478e+01 4.67164509e+01
 4.74541538e+01 4.81614834e+01 4.88617542e+01 4.95627293e+01
 5.02312467e+01 5.08560091e+01 5.14663070e+01 5.21396076e+01
 5.28119354e+01 5.34123044e+01 5.40017918e+01 5.45506777e+01
 5.50620619e+01 5.55629465e+01 5.58901301e+01 5.61781649e+01
 5.64458564e+01 5.66503148e+01 5.67408610e+01 5.67888676e+01
 5.68487789e+01 5.68482732e+01 5.68380415e+01 5.67593899e+01
 5.66145121e+01 5.64080546e+01 5.61680461e+01 5.59297015e+01
 5.57947874e+01 5.56418590e+01 5.54573042e+01 5.51850739e+01
 5.48164223e+01 5.43942995e+01 5.39500905e+01 5.35844854e+01
 5.32152673e+01 5.28219639e+01 5.23559329e+01 5.18283617e+01
 5.12743660e+01 5.07294746e+01 5.03407481e+01 4.99534323e+01
 4.95558918e+01 4.90811904e+01 4.85672964e+01 4.80554334e+01
 4.75191853e+01 4.69285243e+01 4.63202813e+01 4.57253775e+01
 4.51967855e+01 4.46780462e+01 4.41411519e+01 4.36090309e+01
 4.31237544e+01 4.26234430e+01 4.21229527e+01 4.16062358e+01
 4.11001339e+01 4.05970010e+01 4.00483920e+01 3.93473271e+01
 3.86183338e+01 3.79312681e+01 3.72419370e+01 3.65331113e+01
 3.58491775e+01 3.52446409e+01 3.46223511e+01 3.39928289e+01
 3.33893818e+01 3.28376096e+01 3.23053461e+01 3.17857623e+01
 3.12871912e+01 3.08095896e+01 3.03480462e+01 2.99083049e+01
 2.94996953e+01 2.91039058e+01 2.87061624e+01 2.82752776e+01
 2.78303362e+01 2.73938865e+01 2.69788059e+01 2.66080367e+01
 2.62541383e+01 2.58768293e+01 2.55431439e+01 2.52394478e+01
 2.49475969e+01 2.46659189e+01 2.43778254e+01 2.40720302e+01
 2.37565155e+01 2.33695060e+01 2.29311730e+01 2.24592631e+01
 2.19567753e+01 2.14447782e+01 2.09412917e+01 2.04326418e+01
 2.00916012e+01 1.98276334e+01 1.95448204e+01 1.92767801e+01
 1.90035842e+01 1.87090549e+01 1.84392973e+01 1.81699161e+01
 1.78709527e+01 1.75518411e+01 1.72471592e+01 1.69547333e+01
 1.66683573e+01 1.63870486e+01 1.61433726e+01 1.58992148e+01
 1.56399952e+01 1.53771989e+01 1.51301893e+01 1.48791163e+01
 1.46245420e+01 1.43883504e+01 1.41557317e+01 1.39225777e+01
 1.36877553e+01 1.34844903e+01 1.32953559e+01 1.30997653e+01
 1.29038319e+01 1.26947101e+01 1.24454931e+01 1.22182923e+01
 1.20224927e+01 1.18405838e+01 1.16578913e+01 1.14431175e+01
 1.11479510e+01 1.08581792e+01 1.05863184e+01 1.03297295e+01
 1.00867128e+01 9.87407082e+00 9.67015711e+00 9.46596252e+00
 9.27288008e+00 9.09512018e+00 8.94354887e+00 8.82124561e+00
 8.81288712e+00 8.85922453e+00 8.94071022e+00 9.05349761e+00
 9.19420016e+00 9.34552743e+00 9.49747999e+00 9.65523656e+00
 9.86363801e+00 1.00360812e+01 1.01803005e+01 1.03142402e+01
 1.04398447e+01 1.05777249e+01 1.07203403e+01 1.08989392e+01
 1.10794989e+01 1.12903428e+01 1.15199800e+01 1.17808787e+01
 1.20505173e+01 1.23260288e+01 1.26359788e+01 1.29450083e+01
 1.32643406e+01 1.35483752e+01 1.38555810e+01 1.41780859e+01
 1.45061531e+01 1.48610751e+01 1.52447124e+01 1.55891447e+01
 1.59284564e+01 1.62864391e+01 1.66458050e+01 1.70389757e+01
 1.75007754e+01 1.80009912e+01 1.84764096e+01 1.89332699e+01
 1.94678873e+01 2.00294878e+01 2.06438880e+01 2.13676982e+01
 2.20920393e+01 2.27911874e+01 2.34836465e+01 2.41982650e+01
 2.49155062e+01 2.55823797e+01 2.62278338e+01 2.69192295e+01
 2.76097922e+01 2.82781099e+01 2.89552071e+01 2.96321639e+01
 3.03072396e+01 3.09932195e+01 3.16528868e+01 3.22757809e+01
 3.28985693e+01 3.35910351e+01 3.42954240e+01 3.49870229e+01
 3.56284779e+01 3.62579696e+01 3.68465074e+01 3.74230997e+01
 3.80433974e+01 3.86716949e+01 3.92949591e+01 4.00847355e+01
 4.09942833e+01 4.19447183e+01 4.29254696e+01 4.39597260e+01
 4.50088757e+01 4.60251837e+01 4.70230731e+01 4.80884869e+01
 4.92089254e+01 5.03500356e+01 5.15252286e+01 5.26652022e+01
 5.37210243e+01 5.47921501e+01 5.59163644e+01 5.70561303e+01
 5.81948993e+01 5.92698690e+01 6.02928448e+01 6.14148122e+01
 6.26180379e+01 6.38313697e+01 6.50273104e+01 6.62468088e+01
 6.72778591e+01 6.81944911e+01 6.90870662e+01 7.00160892e+01
 7.08236933e+01 7.14965990e+01 7.20881479e+01 7.27152594e+01
 7.33237416e+01 7.40349826e+01 7.46593986e+01 7.53693486e+01
 7.59724087e+01 7.65516293e+01 7.71319543e+01 7.76782784e+01
 7.82029318e+01 7.87756538e+01 7.94241361e+01 8.01219965e+01
 8.08639354e+01 8.16410135e+01 8.23687903e+01 8.30827374e+01
 8.38390179e+01 8.45918538e+01 8.53212492e+01 8.59257708e+01
 8.63874241e+01 8.68928668e+01 8.73564919e+01 8.77505060e+01
 8.83015208e+01 8.87738188e+01 8.92256752e+01 8.96517688e+01
 9.00829434e+01 9.07268025e+01 9.16640987e+01 9.28809574e+01
 9.41160496e+01 9.54028055e+01 9.67876045e+01 9.81026072e+01
 9.91376793e+01 9.99852070e+01 1.00743674e+02 1.01515445e+02
 1.02275819e+02 1.02958981e+02 1.03884912e+02 1.04756323e+02
 1.05787486e+02 1.06821838e+02 1.07802806e+02 1.08831464e+02
 1.09901195e+02 1.11087840e+02 1.12570769e+02 1.14151435e+02
 1.15667019e+02 1.17094712e+02 1.18446586e+02 1.20265384e+02
 1.22049552e+02 1.23765296e+02 1.25499636e+02 1.27178743e+02
 1.28752348e+02 1.30181621e+02 1.31633290e+02 1.33117486e+02
 1.34663709e+02 1.35891493e+02 1.37023900e+02 1.38158983e+02
 1.39279322e+02 1.40333865e+02 1.41449105e+02 1.42690204e+02
 1.43652690e+02 1.44499738e+02 1.45249864e+02 1.45899492e+02
 1.46266249e+02 1.46303855e+02 1.46081967e+02 1.45578053e+02
 1.44924125e+02 1.44158972e+02 1.43311872e+02 1.42580907e+02
 1.41972283e+02 1.41525514e+02 1.41307301e+02 1.41061263e+02
 1.40908869e+02 1.40786787e+02 1.40927282e+02 1.41298503e+02
 1.41699135e+02 1.42129511e+02 1.42498425e+02 1.42929228e+02
 1.43264638e+02 1.43422746e+02 1.44348170e+02 1.45643848e+02
 1.46916644e+02 1.48067412e+02 1.49240899e+02 1.50305521e+02
 1.50775805e+02 1.49948920e+02 1.48520469e+02 1.47044216e+02
 1.45465419e+02 1.43897387e+02 1.42315055e+02 1.41190527e+02
 1.40056822e+02 1.38936945e+02 1.37785084e+02 1.36637851e+02
 1.35510437e+02 1.34279428e+02 1.33014128e+02 1.31881593e+02
 1.30729087e+02 1.29498784e+02 1.28254352e+02 1.26955282e+02
 1.25563979e+02 1.23942417e+02 1.21687877e+02 1.19257639e+02
 1.16735733e+02 1.14173616e+02 1.11519792e+02 1.08788901e+02
 1.06337063e+02 1.05039203e+02 1.04047446e+02 1.02971722e+02
 1.01720058e+02 1.00344505e+02 9.88657021e+01 9.74000201e+01
 9.64158821e+01 9.52521828e+01 9.40126085e+01 9.27088795e+01
 9.13273161e+01 8.98443040e+01 8.84270507e+01 8.71323715e+01
 8.56574342e+01 8.41435274e+01 8.26053532e+01 8.09749953e+01
 7.92914185e+01 7.76903773e+01 7.62801320e+01 7.48853698e+01
 7.33983478e+01 7.18579579e+01 7.02950254e+01 6.86985212e+01
 6.72467106e+01 6.58781689e+01 6.45866611e+01 6.32747968e+01
 6.19560157e+01 6.06363022e+01 5.92979199e+01 5.80724451e+01
 5.68533882e+01 5.56552595e+01 5.44553647e+01 5.32248430e+01
 5.19957447e+01 5.07372620e+01 4.95267505e+01 4.83215452e+01
 4.71251405e+01 4.59368811e+01 4.47572535e+01 4.36260252e+01
 4.25121029e+01 4.14343780e+01 4.04677032e+01 3.95200312e+01
 3.85707296e+01 3.75923891e+01 3.66142670e+01 3.56240337e+01
 3.46976396e+01 3.38026543e+01 3.29169927e+01 3.20298829e+01
 3.11252568e+01 3.02114262e+01 2.93230991e+01 2.85115450e+01
 2.77513910e+01 2.69847027e+01 2.62488476e+01 2.55557697e+01
 2.48687861e+01 2.41828213e+01 2.35815881e+01 2.30666183e+01
 2.25506121e+01 2.20528133e+01 2.15726723e+01 2.11015151e+01
 2.06449961e+01 2.02871518e+01 1.99946919e+01 1.96912960e+01
 1.93955792e+01 1.91070680e+01 1.88280194e+01 1.85642461e+01
 1.84152942e+01 1.82993730e+01 1.81793623e+01 1.80642019e+01
 1.79543838e+01 1.78422289e+01 1.77425965e+01 1.77610366e+01
 1.78223817e+01 1.78778270e+01 1.79289690e+01 1.79923425e+01
 1.80653026e+01 1.81533881e+01 1.83141852e+01 1.84784678e+01
 1.86308418e+01 1.87741084e+01 1.89327462e+01 1.91057870e+01
 1.92808274e+01 1.94994862e+01 1.97248491e+01 1.99400842e+01
 2.01515565e+01 2.03671799e+01 2.05848535e+01 2.07973266e+01
 2.09592975e+01 2.11213502e+01 2.12764348e+01 2.14149395e+01
 2.15675734e+01 2.17274558e+01 2.18980296e+01 2.20255647e+01
 2.21396993e+01 2.22498292e+01 2.23416576e+01 2.24304583e+01
 2.25193983e+01 2.26098051e+01 2.26880059e+01 2.27609788e+01
 2.28314204e+01 2.28954740e+01 2.29525662e+01 2.29958097e+01]
SPM{F} inference field
   SPM.effect    :   Main A
   SPM.z         :  (1x1000) raw test stat field
   SPM.df        :  (1.924, 118.459)
   SPM.fwhm      :  96.81350
   SPM.resels    :  (1, 10.31881)
Inference:
   SPM.alpha     :  0.050
   SPM.zstar     :  6.70324
   SPM.h0reject  :  True
   SPM.p_set     :  <0.001
   SPM.p_cluster :  (0.003, <0.001)
