# Supplementary material for: The Application of Statistical Parametric Mapping to Evaluate Differences in Topspin Backhand between Chinese and Polish Female Table Tennis Players
Source: Appl Bionics Biomech. 2021 Jul 14;2021:5555874. doi: 10.1155/2021/5555874 (PMC8339346; doi:10.1155/2021/5555874)
Supplement: Supplementary Materials — Angles and accelerations. [file 5555874.f1.zip › Ankle RT-Dorsiflexion (deg) cykleSPM.txt]

[ 68.11152489  67.74976419  67.38416444  67.01194693  66.62498762
  66.23486625  65.84919763  65.56766046  65.45567414  65.34454253
  65.22762287  65.10255759  64.98055573  64.91787052  64.85777838
  64.87537112  64.88352451  64.88834554  64.89093199  64.93134109
  64.96586018  65.0053385   65.03579616  65.06250731  65.111034
  65.17580805  65.24017759  65.30745927  65.38751445  65.50188998
  65.60406986  65.72077348  65.83905076  65.9570062   66.06056427
  66.17080425  66.30059056  66.38842029  66.47156301  66.55338378
  66.61803418  66.67102245  66.67251574  66.51318247  66.34226216
  66.16520293  65.98482845  65.79781831  65.61266327  65.36417998
  64.98136771  64.60552031  64.2327504   63.8534351   63.45451317
  63.04543967  62.5846129   61.90184596  61.18832092  60.47457829
  59.79302468  59.15525466  58.52034687  57.95745255  57.51123246
  57.05481253  56.61930093  56.19665602  55.7476146   55.29270728
  54.86636778  54.42989984  53.97907565  53.51894737  53.04691807
  52.56115849  52.05796184  51.41887868  50.71313027  49.9999693
  49.27896388  48.55082832  47.80186298  47.02810766  46.25894335
  45.46593528  44.66159091  43.8553195   43.03287123  42.19623676
  41.4195538   40.64680095  39.80881599  38.95535739  38.08116121
  37.1939549   36.31944751  35.44830092  34.71031134  33.99871957
  33.28280424  32.54843212  31.80055407  31.04621007  30.21641816
  29.41974529  28.64082072  27.85425895  27.11070231  26.36842856
  25.62157574  24.9115407   24.26978699  23.6477509   23.03946177
  22.43577134  21.83872338  21.23117252  20.74045607  20.34201927
  20.01583904  19.67395252  19.32108093  18.96428649  18.62162285
  18.26782044  18.08094898  17.96088144  17.83174267  17.69928908
  17.55641451  17.40631164  17.39266252  17.50113427  17.64748237
  17.79229262  17.92370467  18.04262689  18.16519354  18.29021026
  18.52125522  18.8318969   19.13059171  19.41947095  19.71849111
  20.00388019  20.34903872  20.80796626  21.40466954  21.9691854
  22.48876549  22.95167292  23.39803524  23.88480226  24.46249625
  25.12203991  25.78441083  26.38789387  26.93910042  27.48254996
  28.11900917  28.85269317  29.72633192  30.56860024  31.35060921
  32.05385737  32.66255853  33.25597204  33.94282366  34.61412559
  35.21328534  35.74026568  36.19313154  36.65835301  37.14116701
  37.62429468  38.17045537  38.66498131  39.09917327  39.4765824
  39.89153253  40.35336035  40.85398524  41.35858793  41.80503422
  42.20887635  42.57529659  42.91268121  43.26980149  43.6513472
  44.02566946  44.35963329  44.65591058  44.96203962  45.26889442
  45.62203548  46.02347086  46.47031431  46.87437869  47.25352947
  47.60015059  47.84567579  48.18124017  48.57794705  49.0119092
  49.4169123   49.78576476  50.12555666  50.4598658   50.9675576
  51.56567235  52.18028427  52.75612532  53.29858655  53.80128696
  54.27256368  54.75015413  55.23963789  55.74643313  56.20792562
  56.63339785  57.06959735  57.51022475  57.98043685  58.40156268
  58.75778007  59.06586817  59.32470161  59.57717639  59.80085161
  59.9838012   60.08063517  60.16120951  60.1650955   60.12116337
  60.02551607  59.89835938  59.76334383  59.59059073  59.34742025
  59.06818306  58.73938305  58.39768216  58.03548899  57.67827634
  57.29783233  56.85229022  56.37835245  55.88666097  55.41460466
  54.95569321  54.49399698  54.0343492   53.58019618  53.13292113
  52.67678209  52.24291531  51.84689309  51.54923537  51.28912567
  51.04645764  50.8114363   50.5721392   50.40921344  50.28714166
  50.16563875  50.05848379  50.00428196  49.97707689  49.9588066
  49.98124694  49.98527354  50.00651933  50.04754843  50.12605453
  50.21005131  50.31087062  50.44281641  50.5822272   50.77496702
  51.04134811  51.35837613  51.68286331  52.02555233  52.43612425
  52.85822976  53.24951254  53.5755486   53.80211411  54.0078345
  54.11193988  54.05240958  53.9012439   53.56981609  53.11992117
  52.566634    51.89046197  51.0534197   50.02087203  48.93694717
  47.9097604   46.87201319  46.03724924  45.15963357  44.3553569
  43.63257402  42.85777047  41.99321754  41.01170365  39.89924744
  38.79222607  37.696736    36.55623286  35.37867896  34.17787015
  32.92520792  31.69098623  30.49666061  29.13523944  27.68978218
  26.25051954  24.81994844  23.44790705  22.12558283  20.80771843
  19.53466406  18.30986153  17.13545187  16.00671829  14.95088994
  13.97288864  13.01633149  12.14258331  11.29268992  10.63779004
  10.06492489   9.56121678   9.19049119   8.83829065   8.45237232
   8.04810211   7.66953669   7.30098542   6.93698003   6.62422549
   6.34128267   6.11725276   5.87937404   5.60494702   5.33446811
   5.05397657   4.76828265   4.49952384   4.24782303   4.00790788
   3.81377563   3.6339482    3.47743574   3.36719762   3.25379733
   3.13938422   3.04694693   3.00676688   2.96881864   2.94605577
   2.94943065   2.95525341   2.96040198   2.95449495   2.96786555
   2.98571845   2.99495955   2.98209931   2.98394733   2.97868586
   2.97209497   2.976077     2.98130286   2.99748865   3.03779937
   3.07653262   3.13303471   3.18909027   3.29370731   3.40258328
   3.51792809   3.64528297   3.77919033   3.91418262   4.04610246
   4.19444048   4.34527567   4.49393219   4.64523097   4.79884836
   4.9392844    5.05110994   5.16148894   5.26547621   5.37003972
   5.47463987   5.59101875   5.70721276   5.85979422   6.14082921
   6.486206     6.8518113    7.23185867   7.6175007    7.99136203
   8.36270662   8.74725268   9.06275975   9.40018738   9.74762589
  10.0961415   10.46217293  10.88880167  11.3393548   11.75095476
  12.16323226  12.5998667   13.03893791  13.48715317  13.90274409
  14.34192439  14.84528901  15.40974828  16.01087744  16.6693146
  17.32596349  18.00673855  18.71789615  19.42998531  20.14756558
  20.87472459  21.57158406  22.26821914  23.01795899  23.82552786
  24.63452845  25.42829579  26.201001    26.96080057  27.70522847
  28.44707934  29.15070564  29.84715695  30.55831704  31.2803213
  31.99845012  32.70987491  33.40198045  34.09074058  34.77251245
  35.45409356  36.16953559  36.86144142  37.52653162  38.20750635
  38.87855854  39.50631832  40.12700003  40.70491499  41.24604978
  41.79883449  42.40084395  43.01762311  43.59821224  44.18207928
  44.7696214   45.36112137  45.89984665  46.45050279  46.99709814
  47.49165818  47.98038101  48.46462135  48.9326975   49.38898998
  49.90157326  50.41660375  50.90762742  51.38363683  51.85331796
  52.31356968  52.72201626  53.19870738  53.67711957  54.16183241
  54.64659424  55.14159559  55.62798279  56.10908889  56.63833449
  57.15354861  57.65953367  58.11534124  58.52203239  58.9196525
  59.3044304   59.6447415   59.96976506  60.27268165  60.56263002
  60.84314707  61.11296655  61.35291299  61.48424296  61.58666106
  61.68362278  61.73700575  61.732778    61.70914548  61.66777136
  61.57314854  61.45514057  61.32539506  61.16271927  60.96887657
  60.75658305  60.53092477  60.28802787  60.01911091  59.73540024
  59.40343628  59.02235713  58.61490479  58.28375645  58.22081685
  58.10484874  57.96290086  57.87665482  57.76100804  57.59573091
  57.36760409  57.05344976  56.7245039   56.34921731  55.96822808
  55.53691923  55.0612721   54.53431574  53.95147163  53.31967055
  52.67689468  52.05792193  51.40684565  50.73672658  50.08699256
  49.42306241  48.72992676  48.01866585  47.36651519  46.7250114
  46.08070988  45.43311803  44.7667623   44.04971244  43.31310968
  42.60702921  41.88450557  41.11232656  40.33843543  39.59170803
  38.82847223  38.07812411  37.36091786  36.62553702  35.8593045
  35.17237047  34.53902204  33.89682384  33.26727282  32.65562972
  32.0451038   31.42301564  30.88111101  30.40794099  29.92523113
  29.42432825  28.9273543   28.41816296  27.88945034  27.39384108
  26.86975249  26.31364564  25.78670695  25.25110012  24.69635235
  24.11354814  23.52494144  22.93216159  22.32432806  21.72498563
  21.13948147  20.58083043  20.01586352  19.49550826  18.98058592
  18.45852589  17.95827303  17.42090883  16.87777402  16.32733571
  15.80548016  15.28468736  14.76361983  14.27407312  13.85385503
  13.46305321  13.06660737  12.81036643  12.56783309  12.3428114
  12.12812895  11.93179372  11.75655981  11.58341871  11.45588625
  11.36595913  11.27240458  11.17914444  11.10510816  11.0416412
  11.01494269  11.12205537  11.22834173  11.34265738  11.4710555
  11.623384    11.78187538  11.97133286  12.23623882  12.50461441
  12.77326064  13.03960848  13.33550068  13.64086675  13.95262108
  14.35737785  14.76408968  15.16288852  15.55195067  15.99557938
  16.45837349  16.92476048  17.44259721  17.95619929  18.47597881
  18.98809228  19.56263716  20.16350699  20.76971759  21.42124958
  22.05693607  22.69111135  23.30068026  23.9447724   24.60093888
  25.25367741  25.9469936   26.63413122  27.31775476  27.98441742
  28.69684865  29.42491157  30.16914264  30.96579697  31.74686937
  32.52476673  33.28501151  34.14150517  35.03184315  35.97175036
  36.97434934  37.94574944  38.92850633  39.88839457  40.89753398
  41.90664689  42.91734809  43.94711085  44.98088556  46.01293176
  47.01575797  48.01750548  49.00697392  50.01642663  51.03897846
  52.02790611  53.07752645  54.1578111   55.27004545  56.33088308
  57.34259497  58.31383507  59.21735678  60.07742131  60.86069822
  61.62627236  62.35143722  63.15048639  64.12183685  65.12298374
  66.07211194  66.98954726  67.96096109  68.93645832  69.95325383
  71.00193025  72.05734032  73.10522499  74.13408802  75.20891917
  76.02267399  76.94883411  77.95379324  78.86869895  79.69708055
  80.46966497  81.35457902  82.22710832  83.04331204  83.82971186
  84.53254231  85.14379691  85.86884203  86.6112967   87.2990162
  87.85709624  88.29758608  88.71259629  89.20712303  89.67820743
  90.17226479  90.66274428  91.10039693  91.49008857  91.89047053
  92.26904377  92.59884096  92.98439842  93.33604158  93.48514737
  93.59014058  93.90111309  94.19051811  94.40912782  94.65965528
  94.91083407  95.03700586  95.21120819  95.48486043  95.65827277
  95.73351545  95.78117796  95.71887061  95.7639549   95.8383162
  96.1097711   96.34953527  96.6195022   97.07736281  97.57292124
  98.22157812  98.95166341  99.67271213 100.33086627 100.92515905
 101.37092585 101.72714278 101.97042979 102.08184916 102.10252279
 102.1566944  102.12953062 102.22217032 102.36831527 102.47736443
 102.54900236 102.60029591 102.60833658 102.54407384 102.95471577
 103.60865268 104.73480571 105.80804901 106.76063391 107.55478721
 108.17472565 108.57930088 109.18362689 110.29961757 111.59630788
 112.81182292 113.87713022 114.71142252 115.57115093 116.29744384
 116.80226328 117.22472295 117.51037326 117.67411049 117.72227235
 117.73805822 117.59812201 117.35229854 117.06808059 116.66465309
 116.12722221 115.45935796 115.58619395 116.14091541 116.89798159
 117.54214617 118.04033106 118.38547997 118.59721869 119.30039784
 120.21136449 121.11694995 121.86951162 122.49141618 123.08337163
 123.51717598 123.38919424 124.25273097 125.89189499 127.50441675
 129.00150635 130.37602584 131.55275796 132.70503672 134.58640459
 136.82055647 138.98428853 140.9828062  142.77275465 144.34368438
 145.870652   146.05334616 145.56536703 144.91084555 144.07866936
 143.08557965 141.91695461 141.20215808 141.46001729 142.23237057
 142.95998337 143.50800531 143.83274354 143.86468196 143.50350025
 143.2486562  143.01283685 142.63997313 142.04904796 141.22589196
 140.11201891 138.99265083 137.89566495 136.7471685  135.50904777
 134.07398043 132.4784453  130.68194444 129.33883391 128.19964242
 127.34084881 126.37821905 125.30012148 124.10379178 122.77951466
 121.55542047 120.78338231 119.93531688 118.9439443  117.84831977
 116.6817555  115.43794998 114.33316438 113.37722124 112.289078
 111.03077854 109.69487293 108.3097995  106.96042818 105.77430236
 104.73212383 103.48054921 102.13037046 100.70650441  99.27553514
  97.82087364  96.55489369  95.49573922  94.38898455  93.22752924
  92.00795507  90.68204766  89.36953944  88.41374458  87.6886738
  86.89142562  85.9850599   85.01915699  84.02109474  82.96087814
  82.20612463  81.62676679  80.97103098  80.26952497  79.51403144
  78.73222903  77.93383545  77.35884273  76.93028046  76.4055762
  75.79654409  75.09075142  74.30544672  73.51577457  73.0953946
  72.86917955  72.64432365  72.40583307  72.12332979  71.7719712
  71.41416156  71.05525112  70.76750318  70.43427757  70.06787791
  69.65361732  69.2248854   68.76961667  68.75742963  68.83027482
  68.89950677  68.96521485  68.97092487  68.9231597   68.85031414
  68.94746817  69.05696068  69.09090313  69.07601094  69.05430267
  68.99102482  68.89168734  68.94232697  68.99277172  68.99204207
  68.97301998  68.94476464  68.87309621  68.81208991  68.97171255
  69.14290908  69.26936675  69.35983722  69.41712155  69.43530284
  69.43158226  69.42642775  69.42095681  69.39131644  69.31140903
  69.19458365  69.06059637  68.90001565  69.15320307  69.41758444
  69.62869444  69.79518686  69.84781302  69.82681554  69.7828401
  69.96887335  70.15358182  70.28879504  70.37764202  70.46011629
  70.52539543  70.59490853  70.82924751  71.01812877  71.16554659
  71.30792388  71.40783639  71.45205514  71.45831732  71.77853039
  72.04436239  72.2182323   72.31561748  72.33724825  72.30057774]
SPM{F} inference field
   SPM.effect    :   Main A
   SPM.z         :  (1x1000) raw test stat field
   SPM.df        :  (1.990, 121.482)
   SPM.fwhm      :  88.62512
   SPM.resels    :  (1, 11.27220)
Inference:
   SPM.alpha     :  0.050
   SPM.zstar     :  6.67049
   SPM.h0reject  :  True
   SPM.p_set     :  <0.001
   SPM.p_cluster :  (<0.001, <0.001)
