# Supplementary material for: The Application of Statistical Parametric Mapping to Evaluate Differences in Topspin Backhand between Chinese and Polish Female Table Tennis Players
Source: Appl Bionics Biomech. 2021 Jul 14;2021:5555874. doi: 10.1155/2021/5555874 (PMC8339346; doi:10.1155/2021/5555874)
Supplement: Supplementary Materials — Angles and accelerations. [file 5555874.f1.zip › Ankle RT-Inversion (deg) cykleSPM.txt]

[2.16538680e+01 2.11194257e+01 2.05472696e+01 1.99523354e+01
 1.93324742e+01 1.86828889e+01 1.80016582e+01 1.72875184e+01
 1.65513558e+01 1.58081578e+01 1.50532015e+01 1.42958865e+01
 1.35408195e+01 1.28348911e+01 1.21283761e+01 1.14378457e+01
 1.07550257e+01 1.00870964e+01 9.44754104e+00 8.87847699e+00
 8.32514071e+00 7.77763858e+00 7.24225644e+00 6.73122633e+00
 6.25491536e+00 5.86094158e+00 5.47336098e+00 5.09716761e+00
 4.75395859e+00 4.49712553e+00 4.25319969e+00 4.02579745e+00
 3.79706611e+00 3.57047504e+00 3.34691586e+00 3.10258531e+00
 2.83770935e+00 2.57209498e+00 2.32071709e+00 2.08681583e+00
 1.86622300e+00 1.66189556e+00 1.48282480e+00 1.35592981e+00
 1.23110083e+00 1.10932168e+00 9.93796141e-01 8.83153714e-01
 7.87405522e-01 7.20312789e-01 6.66414302e-01 6.12315780e-01
 5.62136258e-01 5.15658163e-01 4.56771425e-01 3.86209590e-01
 3.60056714e-01 3.57407257e-01 3.54166999e-01 3.50582986e-01
 3.35340643e-01 3.05763892e-01 2.79760762e-01 2.54830497e-01
 2.27201039e-01 2.01266153e-01 1.86381796e-01 1.82462055e-01
 1.80981132e-01 1.81529182e-01 1.78053211e-01 1.76754866e-01
 1.84530391e-01 2.00217639e-01 2.16715414e-01 2.34281988e-01
 2.45992127e-01 2.27948147e-01 2.23638585e-01 2.12146847e-01
 2.02158947e-01 1.91994387e-01 1.82089637e-01 1.76255298e-01
 1.90674348e-01 2.16077693e-01 2.43053691e-01 2.75262654e-01
 3.10353750e-01 3.45396713e-01 4.17969631e-01 5.75734267e-01
 7.68791530e-01 9.88351062e-01 1.23078775e+00 1.50143566e+00
 1.83092139e+00 2.20121162e+00 2.58485617e+00 2.95175706e+00
 3.33857391e+00 3.74353401e+00 4.09692924e+00 4.43639665e+00
 4.79503425e+00 5.16856048e+00 5.61065127e+00 6.06073379e+00
 6.59015167e+00 7.14797932e+00 7.72274891e+00 8.38843564e+00
 9.12473735e+00 9.94629234e+00 1.08095100e+01 1.16866467e+01
 1.25777347e+01 1.34805292e+01 1.45524133e+01 1.58122745e+01
 1.69078690e+01 1.80115356e+01 1.91317422e+01 2.02552610e+01
 2.13801222e+01 2.28246177e+01 2.42176793e+01 2.54723994e+01
 2.66484479e+01 2.77645147e+01 2.88187655e+01 2.98127608e+01
 3.05868839e+01 3.11326895e+01 3.14762996e+01 3.17546907e+01
 3.19832614e+01 3.21501618e+01 3.22834214e+01 3.22873757e+01
 3.21297256e+01 3.19849049e+01 3.18010401e+01 3.15445626e+01
 3.12195698e+01 3.08664760e+01 3.06163092e+01 3.03616052e+01
 3.03322721e+01 3.02956402e+01 3.01889426e+01 3.00629033e+01
 2.98422110e+01 2.95606404e+01 2.93083043e+01 2.90117575e+01
 2.86333269e+01 2.82384976e+01 2.78354937e+01 2.73763593e+01
 2.69465998e+01 2.65177965e+01 2.59968812e+01 2.54297237e+01
 2.48877823e+01 2.43558815e+01 2.38640366e+01 2.33506475e+01
 2.27061003e+01 2.18691538e+01 2.10502761e+01 2.02830353e+01
 1.95502170e+01 1.87757839e+01 1.78872128e+01 1.69020788e+01
 1.59424598e+01 1.50290741e+01 1.41521675e+01 1.33229160e+01
 1.25784890e+01 1.18398793e+01 1.10702545e+01 1.03295067e+01
 9.62673992e+00 8.93515547e+00 8.26552468e+00 7.63111020e+00
 7.01735006e+00 6.42609194e+00 5.89599071e+00 5.39556028e+00
 4.92259292e+00 4.46035000e+00 4.02417142e+00 3.66012163e+00
 3.34648146e+00 3.04485727e+00 2.75313926e+00 2.47095332e+00
 2.20657741e+00 1.96039143e+00 1.74280295e+00 1.55295472e+00
 1.39600642e+00 1.25244457e+00 1.11904481e+00 9.95495100e-01
 8.83473464e-01 7.95938272e-01 7.27474915e-01 6.74796132e-01
 6.22094663e-01 5.70069032e-01 5.18527051e-01 4.65836912e-01
 4.31414247e-01 4.01922430e-01 3.63180147e-01 3.25233902e-01
 2.89098169e-01 2.49765784e-01 2.10904293e-01 1.76537344e-01
 1.48060375e-01 1.28209322e-01 1.10057551e-01 9.51238591e-02
 8.20251361e-02 7.02291778e-02 5.93893948e-02 5.13258377e-02
 4.82751198e-02 4.13518847e-02 3.49009814e-02 2.83018827e-02
 2.16922983e-02 1.99175862e-02 1.92019392e-02 1.85421328e-02
 1.68167851e-02 1.50411832e-02 1.37448291e-02 1.33035355e-02
 1.34600058e-02 1.38816383e-02 1.11492261e-02 7.78735717e-03
 4.90650384e-03 1.87498633e-03 9.14527249e-05 9.70258782e-04
 5.44274448e-03 1.37260914e-02 2.53888731e-02 4.03416624e-02
 6.13472828e-02 8.99402243e-02 1.10726718e-01 1.36622725e-01
 1.62661659e-01 1.94431935e-01 2.28475168e-01 2.65535711e-01
 3.20698308e-01 3.86840658e-01 4.69279056e-01 5.84844849e-01
 7.25531016e-01 8.97713426e-01 1.05815334e+00 1.22486588e+00
 1.36888241e+00 1.50183770e+00 1.61380733e+00 1.67803434e+00
 1.74795866e+00 1.78969033e+00 1.80644168e+00 1.79183358e+00
 1.72467378e+00 1.52750477e+00 1.33280474e+00 1.14796496e+00
 9.64124980e-01 7.84465744e-01 6.26857838e-01 5.20723582e-01
 4.03927364e-01 2.94436234e-01 1.81880391e-01 7.31217646e-02
 1.01937923e-02 9.30289122e-03 8.61266391e-02 2.31538947e-01
 4.45766558e-01 6.76782964e-01 8.76558891e-01 1.10527627e+00
 1.35740295e+00 1.61379317e+00 1.82706762e+00 2.04344640e+00
 2.25891204e+00 2.48179587e+00 2.67223141e+00 2.80949749e+00
 2.94883289e+00 3.16458671e+00 3.41759968e+00 3.66034525e+00
 3.88920203e+00 4.16831459e+00 4.52517910e+00 4.85699270e+00
 5.15389447e+00 5.52749743e+00 5.99534359e+00 6.53882908e+00
 7.00632505e+00 7.40205401e+00 7.81215576e+00 8.11952502e+00
 8.38601857e+00 8.59240058e+00 8.78609648e+00 8.87146711e+00
 8.77187918e+00 8.71194817e+00 8.87325811e+00 9.01500855e+00
 9.03138004e+00 8.96481346e+00 9.20094531e+00 9.57973692e+00
 9.99497067e+00 1.04805234e+01 1.09915254e+01 1.14764926e+01
 1.19662454e+01 1.22872257e+01 1.25154429e+01 1.26339822e+01
 1.25808325e+01 1.25252973e+01 1.25766214e+01 1.27526193e+01
 1.30513674e+01 1.33581365e+01 1.37557701e+01 1.43545864e+01
 1.50512847e+01 1.58986383e+01 1.68423228e+01 1.80471982e+01
 1.93617044e+01 2.06669634e+01 2.17897835e+01 2.28750069e+01
 2.38442255e+01 2.46668665e+01 2.55184978e+01 2.63524513e+01
 2.71022521e+01 2.77146513e+01 2.83339128e+01 2.90137076e+01
 2.96379669e+01 3.00344377e+01 3.03895978e+01 3.08095891e+01
 3.14167935e+01 3.20504558e+01 3.28489328e+01 3.36442282e+01
 3.45002609e+01 3.53998931e+01 3.63504515e+01 3.75823109e+01
 3.90782138e+01 4.05556958e+01 4.19083212e+01 4.34747332e+01
 4.49236783e+01 4.62949296e+01 4.74727277e+01 4.85949458e+01
 4.95184347e+01 5.02719895e+01 5.10954163e+01 5.18367370e+01
 5.25089507e+01 5.30813367e+01 5.35060182e+01 5.36371220e+01
 5.35445952e+01 5.35010712e+01 5.33424496e+01 5.29999450e+01
 5.25259342e+01 5.20079658e+01 5.14581401e+01 5.10555363e+01
 5.06034533e+01 5.02188198e+01 4.98295308e+01 4.94330321e+01
 4.90227010e+01 4.87248119e+01 4.84160807e+01 4.80268933e+01
 4.76569529e+01 4.71856695e+01 4.67207313e+01 4.63480957e+01
 4.60765812e+01 4.57511399e+01 4.53484823e+01 4.48939143e+01
 4.43852042e+01 4.38277319e+01 4.32730218e+01 4.25958670e+01
 4.18809664e+01 4.11374259e+01 4.04989604e+01 4.00449065e+01
 3.95809877e+01 3.90816987e+01 3.84940779e+01 3.79676004e+01
 3.75028750e+01 3.70010124e+01 3.64907986e+01 3.59702852e+01
 3.53878094e+01 3.47564754e+01 3.40910992e+01 3.34427689e+01
 3.27768549e+01 3.20597039e+01 3.12691417e+01 3.04697226e+01
 2.96669044e+01 2.88498333e+01 2.80177144e+01 2.71964449e+01
 2.63648219e+01 2.55287971e+01 2.47134169e+01 2.39116470e+01
 2.31880236e+01 2.25784836e+01 2.19349025e+01 2.12821483e+01
 2.07096160e+01 2.01867297e+01 1.96818150e+01 1.92438918e+01
 1.88778683e+01 1.86235338e+01 1.84006546e+01 1.82561134e+01
 1.81372157e+01 1.79894251e+01 1.78586936e+01 1.77365953e+01
 1.75932130e+01 1.74596954e+01 1.73548526e+01 1.71495389e+01
 1.69793106e+01 1.68386351e+01 1.66903840e+01 1.65757673e+01
 1.64911202e+01 1.64118870e+01 1.63311774e+01 1.62256531e+01
 1.60516798e+01 1.59006249e+01 1.57477461e+01 1.56233522e+01
 1.55060470e+01 1.53665302e+01 1.52225529e+01 1.51174226e+01
 1.50145984e+01 1.49186853e+01 1.48269777e+01 1.47330571e+01
 1.46272076e+01 1.45144527e+01 1.43492652e+01 1.42042334e+01
 1.40494567e+01 1.39072399e+01 1.37758215e+01 1.36417589e+01
 1.35058370e+01 1.32632742e+01 1.30139091e+01 1.27613787e+01
 1.24945049e+01 1.22050508e+01 1.19109115e+01 1.16458196e+01
 1.14779409e+01 1.13156687e+01 1.11625545e+01 1.10154620e+01
 1.08773427e+01 1.07535845e+01 1.06325270e+01 1.05783272e+01
 1.05301044e+01 1.04803176e+01 1.04753484e+01 1.05046284e+01
 1.05370191e+01 1.05865530e+01 1.07229889e+01 1.08572890e+01
 1.09863891e+01 1.11307560e+01 1.12898974e+01 1.14449580e+01
 1.15768977e+01 1.16597617e+01 1.17437882e+01 1.18188276e+01
 1.18518433e+01 1.18722340e+01 1.18911735e+01 1.19292381e+01
 1.20040155e+01 1.20937680e+01 1.21771628e+01 1.22106702e+01
 1.22369233e+01 1.22634762e+01 1.22763159e+01 1.22260305e+01
 1.21753524e+01 1.21285472e+01 1.21117957e+01 1.20958704e+01
 1.20839753e+01 1.21088929e+01 1.21430720e+01 1.21674372e+01
 1.21905701e+01 1.22208323e+01 1.22472058e+01 1.22965671e+01
 1.23137463e+01 1.22919476e+01 1.22764819e+01 1.22590303e+01
 1.22536609e+01 1.22660337e+01 1.22769845e+01 1.22989352e+01
 1.23167513e+01 1.23333663e+01 1.23291690e+01 1.23058308e+01
 1.22690576e+01 1.22261021e+01 1.22635580e+01 1.23711270e+01
 1.24721261e+01 1.25554272e+01 1.26346682e+01 1.27082211e+01
 1.27769478e+01 1.26906489e+01 1.24968051e+01 1.22945901e+01
 1.20797997e+01 1.18465559e+01 1.15711688e+01 1.12838828e+01
 1.11459324e+01 1.10481812e+01 1.09429601e+01 1.08180286e+01
 1.07336202e+01 1.06830770e+01 1.06433850e+01 1.06507958e+01
 1.06939877e+01 1.07349107e+01 1.07723101e+01 1.08335266e+01
 1.08703511e+01 1.08913656e+01 1.09252680e+01 1.09545101e+01
 1.09737854e+01 1.09438532e+01 1.08471951e+01 1.06904675e+01
 1.05351387e+01 1.04678784e+01 1.04375004e+01 1.03954477e+01
 1.03011909e+01 1.01378424e+01 9.92688784e+00 9.71545857e+00
 9.44882608e+00 9.21173134e+00 8.89273076e+00 8.55732964e+00
 8.22040202e+00 7.90782837e+00 7.59387296e+00 7.23867892e+00
 6.96105111e+00 6.69241777e+00 6.45577758e+00 6.21856079e+00
 5.97954296e+00 5.75551928e+00 5.64884742e+00 5.56173896e+00
 5.46893808e+00 5.37140095e+00 5.28422895e+00 5.17623326e+00
 4.91895283e+00 4.67023877e+00 4.41376879e+00 4.16058021e+00
 3.91116056e+00 3.68416612e+00 3.52507451e+00 3.36624395e+00
 3.19478230e+00 3.04373932e+00 2.90936865e+00 2.79942292e+00
 2.73688565e+00 2.67692504e+00 2.60715281e+00 2.50337092e+00
 2.38669223e+00 2.27354834e+00 2.14112961e+00 2.01825415e+00
 1.90385573e+00 1.78470913e+00 1.65895316e+00 1.54126058e+00
 1.41411469e+00 1.29235978e+00 1.17124006e+00 1.05405994e+00
 9.48719670e-01 8.67031864e-01 7.96810336e-01 7.00579798e-01
 6.06629965e-01 5.04591600e-01 4.05397857e-01 3.16417567e-01
 2.37891802e-01 1.75041842e-01 1.24153326e-01 8.23930146e-02
 5.26444510e-02 3.13239454e-02 1.61178536e-02 5.91754663e-03
 1.23707858e-03 1.16944881e-05 7.67581882e-04 2.95844066e-03
 6.21222799e-03 1.00022845e-02 1.41109669e-02 1.69523674e-02
 1.79428813e-02 1.76500737e-02 1.92242677e-02 2.24184431e-02
 2.71955291e-02 3.29856135e-02 3.82894183e-02 4.57123323e-02
 5.87044649e-02 6.67017581e-02 7.22498414e-02 8.00696011e-02
 9.00216504e-02 9.00185501e-02 8.12502278e-02 7.28999616e-02
 6.06756688e-02 4.85580323e-02 3.91346832e-02 4.16465820e-02
 5.08565176e-02 6.14235155e-02 7.30241731e-02 7.88554562e-02
 8.18422998e-02 8.38762203e-02 8.44935930e-02 8.48010165e-02
 8.63764239e-02 8.81743974e-02 8.80706862e-02 9.00558980e-02
 8.78599474e-02 8.36661736e-02 7.90159572e-02 7.40243939e-02
 6.97666129e-02 7.63661579e-02 8.68807975e-02 8.95801442e-02
 8.68205779e-02 8.60481462e-02 8.62913947e-02 8.01334161e-02
 7.18578747e-02 6.15677296e-02 4.12777827e-02 2.38498955e-02
 1.10532699e-02 1.73956688e-03 7.68610666e-04 9.44778479e-03
 2.65107806e-02 4.76418768e-02 7.35397101e-02 1.01940491e-01
 1.33671283e-01 1.71954927e-01 2.10040320e-01 2.48047879e-01
 2.89921067e-01 3.17489366e-01 3.58179596e-01 3.82366106e-01
 4.02394545e-01 4.46032061e-01 4.99645258e-01 6.17231482e-01
 7.56501585e-01 9.02086742e-01 1.05053382e+00 1.20425567e+00
 1.38548326e+00 1.59045504e+00 1.77913560e+00 1.93061897e+00
 2.06243254e+00 2.22001965e+00 2.35034187e+00 2.44065403e+00
 2.51587704e+00 2.62780789e+00 2.60977640e+00 2.53561107e+00
 2.46686750e+00 2.39469070e+00 2.29471334e+00 2.17935198e+00
 2.04180089e+00 1.98832429e+00 1.95312118e+00 1.91667141e+00
 1.90210103e+00 1.92329913e+00 1.90838943e+00 1.85434963e+00
 1.82881443e+00 1.82771771e+00 1.81385777e+00 1.78695172e+00
 1.75161283e+00 1.74244306e+00 1.73381818e+00 1.70440405e+00
 1.66956612e+00 1.62887297e+00 1.59328181e+00 1.57921590e+00
 1.60084389e+00 1.65545470e+00 1.75352881e+00 1.84851841e+00
 1.93702202e+00 2.02069042e+00 2.10599609e+00 2.24289038e+00
 2.47860731e+00 2.75229460e+00 3.03838121e+00 3.29165160e+00
 3.54115249e+00 3.91805703e+00 4.29874539e+00 4.63733026e+00
 4.93070419e+00 5.22216004e+00 5.48762552e+00 5.76265463e+00
 6.12433641e+00 6.52277821e+00 6.92026644e+00 7.28555298e+00
 7.65270530e+00 8.01804646e+00 8.36469600e+00 8.73396124e+00
 9.17001100e+00 9.60635372e+00 9.95568016e+00 1.02812348e+01
 1.05120454e+01 1.07253902e+01 1.07137147e+01 1.05238671e+01
 1.01825497e+01 9.80084950e+00 9.38737618e+00 8.94281892e+00
 8.50761245e+00 8.13461113e+00 7.91150207e+00 7.86320081e+00
 7.94077944e+00 7.98978342e+00 8.01704708e+00 8.04037447e+00
 8.18216455e+00 8.50931822e+00 9.01611797e+00 9.58283429e+00
 1.01093410e+01 1.06118947e+01 1.10950587e+01 1.13596456e+01
 1.17754696e+01 1.23176991e+01 1.28752599e+01 1.34270585e+01
 1.39991007e+01 1.45647418e+01 1.50981411e+01 1.55553872e+01
 1.58930075e+01 1.61717406e+01 1.64654468e+01 1.66977949e+01
 1.68890466e+01 1.72145512e+01 1.74563236e+01 1.74289874e+01
 1.73396044e+01 1.71908904e+01 1.70078313e+01 1.67876641e+01
 1.66372500e+01 1.67384841e+01 1.68052161e+01 1.68461573e+01
 1.68695893e+01 1.68574881e+01 1.68096912e+01 1.68333184e+01
 1.68302529e+01 1.66167466e+01 1.63947283e+01 1.61494194e+01
 1.58800173e+01 1.56010599e+01 1.52245627e+01 1.48429176e+01
 1.44245439e+01 1.39893173e+01 1.35299146e+01 1.30517812e+01
 1.25569889e+01 1.20579989e+01 1.16777193e+01 1.15087267e+01
 1.13550377e+01 1.11916640e+01 1.09880748e+01 1.07767324e+01
 1.06186215e+01 1.05321489e+01 1.05089640e+01 1.04782217e+01
 1.04569665e+01 1.04529438e+01 1.04402034e+01 1.04569412e+01
 1.04501461e+01 1.03950949e+01 1.03755679e+01 1.03636518e+01
 1.03512323e+01 1.03483161e+01 1.03093932e+01 1.02162820e+01
 1.00856087e+01 9.95410790e+00 9.82746339e+00 9.70895397e+00
 9.59035457e+00 9.48160539e+00 9.36966036e+00 9.25572390e+00
 9.13760273e+00 9.03001333e+00 8.91842150e+00 8.80340522e+00
 8.71011394e+00 8.67825205e+00 8.65942917e+00 8.64969788e+00
 8.65136446e+00 8.67739594e+00 8.72108623e+00 8.80244069e+00
 8.94843372e+00 9.09245608e+00 9.22410059e+00 9.36522646e+00
 9.51051337e+00 9.65387196e+00 9.76684501e+00 9.88515431e+00
 1.00082256e+01 1.01392565e+01 1.02757912e+01 1.04128119e+01
 1.05491528e+01 1.06897013e+01 1.07827994e+01 1.08829372e+01
 1.09791429e+01 1.10583247e+01 1.11347179e+01 1.12145275e+01
 1.12927036e+01 1.13685775e+01 1.14390963e+01 1.15070418e+01
 1.15609682e+01 1.16304846e+01 1.17030238e+01 1.18935251e+01
 1.21497614e+01 1.24100088e+01 1.26655213e+01 1.29100517e+01
 1.31330170e+01 1.33663885e+01 1.36364362e+01 1.38977783e+01
 1.41528899e+01 1.43929388e+01 1.46152017e+01 1.48232339e+01
 1.50250836e+01 1.54780949e+01 1.59741326e+01 1.64629404e+01
 1.69338969e+01 1.73933654e+01 1.78243963e+01 1.82537228e+01
 1.88330917e+01 1.94039511e+01 1.99780091e+01 2.05390402e+01
 2.10945746e+01 2.16359227e+01 2.21687063e+01 2.27390777e+01
 2.33167415e+01 2.38656470e+01 2.43998500e+01 2.49253694e+01
 2.54436507e+01 2.59371479e+01 2.61493328e+01 2.63890331e+01
 2.66078641e+01 2.68017981e+01 2.69874336e+01 2.71503403e+01]
SPM{F} inference field
   SPM.effect    :   Main A
   SPM.z         :  (1x1000) raw test stat field
   SPM.df        :  (1.672, 98.265)
   SPM.fwhm      :  76.85196
   SPM.resels    :  (1, 12.99902)
Inference:
   SPM.alpha     :  0.050
   SPM.zstar     :  7.67000
   SPM.h0reject  :  True
   SPM.p_set     :  <0.001
   SPM.p_cluster :  (0.035, <0.001, <0.001, <0.001)
