# Supplementary material for: The Application of Statistical Parametric Mapping to Evaluate Differences in Topspin Backhand between Chinese and Polish Female Table Tennis Players
Source: Appl Bionics Biomech. 2021 Jul 14;2021:5555874. doi: 10.1155/2021/5555874 (PMC8339346; doi:10.1155/2021/5555874)
Supplement: Supplementary Materials — Angles and accelerations. [file 5555874.f1.zip › Elbow LT-Flexion (deg) cykleSPM.txt]

[2.26622836e+00 2.54190925e+00 2.83228266e+00 3.11212016e+00
 3.39862503e+00 3.68287736e+00 3.97299378e+00 4.26210764e+00
 4.48996028e+00 4.73480879e+00 4.98534320e+00 5.22523692e+00
 5.46359314e+00 5.70426190e+00 5.94447647e+00 6.17818482e+00
 6.42162668e+00 6.66867242e+00 6.91825910e+00 7.16875300e+00
 7.41792297e+00 7.66587800e+00 7.87041157e+00 8.07388547e+00
 8.28609679e+00 8.50643280e+00 8.73526723e+00 8.96626593e+00
 9.20841150e+00 9.42723963e+00 9.65140670e+00 9.87234589e+00
 1.01008002e+01 1.03387227e+01 1.05794495e+01 1.08418390e+01
 1.10926394e+01 1.13369426e+01 1.15826903e+01 1.18344247e+01
 1.20859228e+01 1.23384351e+01 1.25697875e+01 1.27890002e+01
 1.30143269e+01 1.32435280e+01 1.34746326e+01 1.37045999e+01
 1.39437627e+01 1.41830538e+01 1.44009772e+01 1.46010954e+01
 1.47911362e+01 1.49696147e+01 1.51278783e+01 1.52797077e+01
 1.54550288e+01 1.56265923e+01 1.57802439e+01 1.59144934e+01
 1.60395671e+01 1.61501888e+01 1.62468397e+01 1.63277202e+01
 1.63750561e+01 1.64286715e+01 1.64609315e+01 1.64910327e+01
 1.65215998e+01 1.65507326e+01 1.65680873e+01 1.65798040e+01
 1.65762056e+01 1.65925661e+01 1.65865394e+01 1.65722789e+01
 1.65431215e+01 1.65160583e+01 1.65030748e+01 1.64803821e+01
 1.64660063e+01 1.64531273e+01 1.64341915e+01 1.64238839e+01
 1.64210055e+01 1.64275368e+01 1.64455312e+01 1.64770156e+01
 1.65032722e+01 1.65292315e+01 1.65468470e+01 1.65386521e+01
 1.65123107e+01 1.64621820e+01 1.64226460e+01 1.63904354e+01
 1.63624226e+01 1.63384622e+01 1.63054521e+01 1.62764106e+01
 1.62726185e+01 1.62733958e+01 1.62977100e+01 1.63433776e+01
 1.63961669e+01 1.64176349e+01 1.64145102e+01 1.64100425e+01
 1.64037448e+01 1.63797230e+01 1.63510681e+01 1.63407559e+01
 1.63239190e+01 1.63165382e+01 1.63284951e+01 1.63560776e+01
 1.64174336e+01 1.64328520e+01 1.64655823e+01 1.65179757e+01
 1.65590801e+01 1.66166555e+01 1.66721813e+01 1.67245390e+01
 1.68034273e+01 1.68654774e+01 1.69217281e+01 1.69667134e+01
 1.69926615e+01 1.69903766e+01 1.69828470e+01 1.69770199e+01
 1.69358522e+01 1.69295356e+01 1.69402309e+01 1.69981872e+01
 1.70604365e+01 1.71236330e+01 1.71854941e+01 1.72966891e+01
 1.73905666e+01 1.75038399e+01 1.76233916e+01 1.77583493e+01
 1.79135476e+01 1.80626258e+01 1.81809498e+01 1.83096046e+01
 1.83927743e+01 1.84586979e+01 1.85398177e+01 1.86110705e+01
 1.86856330e+01 1.87850571e+01 1.89143808e+01 1.90586344e+01
 1.92183147e+01 1.93621217e+01 1.94996668e+01 1.96349967e+01
 1.97762157e+01 1.98922055e+01 1.99692407e+01 2.00454194e+01
 2.01410886e+01 2.02400799e+01 2.03602853e+01 2.04766721e+01
 2.06039807e+01 2.07655396e+01 2.09522856e+01 2.11343314e+01
 2.12998403e+01 2.14638959e+01 2.16268078e+01 2.18100739e+01
 2.20156711e+01 2.22173951e+01 2.24005213e+01 2.25828430e+01
 2.27726695e+01 2.29737252e+01 2.31848181e+01 2.33906343e+01
 2.36278508e+01 2.38587681e+01 2.40912397e+01 2.43473132e+01
 2.46112108e+01 2.48838701e+01 2.51519085e+01 2.53943795e+01
 2.56291776e+01 2.58653426e+01 2.61267829e+01 2.64262507e+01
 2.67395527e+01 2.69979642e+01 2.72490331e+01 2.74844713e+01
 2.77026239e+01 2.79145142e+01 2.81385463e+01 2.83960811e+01
 2.87013067e+01 2.90088160e+01 2.93118477e+01 2.96291527e+01
 2.99395296e+01 3.02285893e+01 3.05120571e+01 3.08042385e+01
 3.10931206e+01 3.13745612e+01 3.16497344e+01 3.19085608e+01
 3.21948868e+01 3.24873727e+01 3.28023993e+01 3.30925344e+01
 3.33878291e+01 3.36901966e+01 3.39750574e+01 3.42819944e+01
 3.46150628e+01 3.49390779e+01 3.52453979e+01 3.55571049e+01
 3.58562593e+01 3.61629563e+01 3.64366666e+01 3.67068476e+01
 3.70048064e+01 3.73295054e+01 3.76543804e+01 3.79757517e+01
 3.82914627e+01 3.86170587e+01 3.89468150e+01 3.92803834e+01
 3.95909618e+01 3.98840422e+01 4.01842948e+01 4.04915017e+01
 4.07443015e+01 4.10029793e+01 4.12425659e+01 4.14871955e+01
 4.17544279e+01 4.20100018e+01 4.22563002e+01 4.24673132e+01
 4.26840922e+01 4.29070719e+01 4.31286900e+01 4.33537997e+01
 4.35641212e+01 4.37673181e+01 4.39710076e+01 4.41810619e+01
 4.44061173e+01 4.46392695e+01 4.48709894e+01 4.50758956e+01
 4.52703435e+01 4.54718940e+01 4.56690432e+01 4.58421244e+01
 4.60193144e+01 4.61902627e+01 4.63866600e+01 4.65809841e+01
 4.66958279e+01 4.68004624e+01 4.69133625e+01 4.70018224e+01
 4.70760219e+01 4.71467191e+01 4.72043991e+01 4.72683966e+01
 4.73465999e+01 4.74330334e+01 4.75358186e+01 4.76399016e+01
 4.77369490e+01 4.78302033e+01 4.79326909e+01 4.80015310e+01
 4.80443249e+01 4.80636872e+01 4.80753186e+01 4.80830093e+01
 4.80761691e+01 4.80386264e+01 4.79761667e+01 4.79086073e+01
 4.78527790e+01 4.77910227e+01 4.77292973e+01 4.76758509e+01
 4.76274489e+01 4.75733368e+01 4.75545621e+01 4.75303839e+01
 4.74978805e+01 4.74636017e+01 4.74344399e+01 4.74091997e+01
 4.73717138e+01 4.73114401e+01 4.72471594e+01 4.72160507e+01
 4.71893024e+01 4.71707571e+01 4.71554951e+01 4.71659208e+01
 4.72013338e+01 4.72340741e+01 4.72511211e+01 4.72679153e+01
 4.72904481e+01 4.73139116e+01 4.73316710e+01 4.73413083e+01
 4.73440644e+01 4.73627291e+01 4.74007367e+01 4.74629151e+01
 4.75431443e+01 4.76278117e+01 4.77339557e+01 4.78424788e+01
 4.79851704e+01 4.81310744e+01 4.82883246e+01 4.84354545e+01
 4.85872620e+01 4.87262912e+01 4.88645136e+01 4.90526555e+01
 4.92496778e+01 4.94516655e+01 4.96370350e+01 4.98339199e+01
 5.00292750e+01 5.02144682e+01 5.04149006e+01 5.06247398e+01
 5.08850877e+01 5.11797545e+01 5.15038726e+01 5.18330072e+01
 5.21836310e+01 5.25544901e+01 5.29338288e+01 5.33744522e+01
 5.38233866e+01 5.42875386e+01 5.47700312e+01 5.52447591e+01
 5.57005794e+01 5.61354328e+01 5.66317011e+01 5.71348748e+01
 5.76348355e+01 5.81375726e+01 5.86386952e+01 5.91392593e+01
 5.96439412e+01 6.02619783e+01 6.08844468e+01 6.15348789e+01
 6.22335786e+01 6.29378815e+01 6.36239343e+01 6.42369438e+01
 6.49447727e+01 6.56520232e+01 6.63402172e+01 6.70001916e+01
 6.76529610e+01 6.82771006e+01 6.88573278e+01 6.94694328e+01
 7.00846831e+01 7.07024851e+01 7.13244165e+01 7.19821371e+01
 7.25982926e+01 7.31943830e+01 7.38200653e+01 7.44366449e+01
 7.50593371e+01 7.56716038e+01 7.63438751e+01 7.70297762e+01
 7.77394974e+01 7.84204195e+01 7.91084040e+01 7.97898520e+01
 8.04502978e+01 8.11648653e+01 8.18929317e+01 8.26227562e+01
 8.33168712e+01 8.39961072e+01 8.46579951e+01 8.52999526e+01
 8.59204453e+01 8.65314368e+01 8.70996578e+01 8.76531334e+01
 8.82285344e+01 8.87936831e+01 8.93347989e+01 8.98766808e+01
 9.04089727e+01 9.08907570e+01 9.13459437e+01 9.17901085e+01
 9.21965888e+01 9.25860518e+01 9.29662089e+01 9.33046275e+01
 9.35795599e+01 9.38016649e+01 9.40226711e+01 9.42645596e+01
 9.44854300e+01 9.47119928e+01 9.49546153e+01 9.51800773e+01
 9.54065680e+01 9.56294237e+01 9.58665050e+01 9.61256458e+01
 9.63900461e+01 9.66902422e+01 9.69876212e+01 9.72889595e+01
 9.75825443e+01 9.78266992e+01 9.80450678e+01 9.82341489e+01
 9.84291205e+01 9.85271227e+01 9.85817485e+01 9.86318031e+01
 9.86763196e+01 9.86962380e+01 9.86987519e+01 9.87068154e+01
 9.87191604e+01 9.87420734e+01 9.87439958e+01 9.87156526e+01
 9.86394672e+01 9.85822384e+01 9.85444352e+01 9.84417245e+01
 9.83124433e+01 9.81742511e+01 9.80288356e+01 9.78767052e+01
 9.77095675e+01 9.75981742e+01 9.74283362e+01 9.72367842e+01
 9.70533292e+01 9.68409062e+01 9.65965040e+01 9.64152069e+01
 9.62619378e+01 9.61549864e+01 9.60725617e+01 9.59998890e+01
 9.59845995e+01 9.60096488e+01 9.60466847e+01 9.60756334e+01
 9.60716213e+01 9.60358523e+01 9.60045125e+01 9.59989779e+01
 9.59997640e+01 9.59898811e+01 9.60412104e+01 9.60937086e+01
 9.61205519e+01 9.61155650e+01 9.60686979e+01 9.59924542e+01
 9.58968905e+01 9.58225959e+01 9.57693251e+01 9.57253360e+01
 9.56771714e+01 9.56312299e+01 9.55572107e+01 9.54833661e+01
 9.54252855e+01 9.53522283e+01 9.52492607e+01 9.51499040e+01
 9.50688730e+01 9.50086033e+01 9.49347467e+01 9.48221863e+01
 9.47311827e+01 9.46703797e+01 9.46056203e+01 9.44719284e+01
 9.42829191e+01 9.40368726e+01 9.37877814e+01 9.35855120e+01
 9.33627467e+01 9.31509217e+01 9.29354686e+01 9.27144399e+01
 9.25118748e+01 9.22767024e+01 9.20516742e+01 9.18099755e+01
 9.15624641e+01 9.13416095e+01 9.11017940e+01 9.08283912e+01
 9.05604715e+01 9.03010409e+01 9.00471544e+01 8.98170332e+01
 8.95408837e+01 8.92447626e+01 8.89440577e+01 8.86513280e+01
 8.83787158e+01 8.80781411e+01 8.77676777e+01 8.73974385e+01
 8.70173632e+01 8.66318827e+01 8.62426429e+01 8.58571238e+01
 8.54271888e+01 8.50151112e+01 8.46459524e+01 8.42730136e+01
 8.38918301e+01 8.35240956e+01 8.31852684e+01 8.28672149e+01
 8.25112033e+01 8.21811803e+01 8.18490249e+01 8.15150107e+01
 8.11547167e+01 8.07846164e+01 8.04011945e+01 8.00027993e+01
 7.95740261e+01 7.90960541e+01 7.86108275e+01 7.81175631e+01
 7.76105187e+01 7.70859733e+01 7.65773556e+01 7.60804767e+01
 7.55662757e+01 7.50522365e+01 7.45456916e+01 7.40331319e+01
 7.35617338e+01 7.31272057e+01 7.27170851e+01 7.22953916e+01
 7.18777033e+01 7.14471215e+01 7.10091677e+01 7.05476094e+01
 7.00835356e+01 6.96714733e+01 6.93069751e+01 6.89211018e+01
 6.85572166e+01 6.82147861e+01 6.78648986e+01 6.75076577e+01
 6.71054220e+01 6.67057276e+01 6.62880150e+01 6.59284611e+01
 6.55595780e+01 6.51763655e+01 6.47898841e+01 6.44207845e+01
 6.41136062e+01 6.38199230e+01 6.35438190e+01 6.32710373e+01
 6.30072097e+01 6.27263802e+01 6.24248534e+01 6.21078410e+01
 6.17781555e+01 6.14561288e+01 6.11373480e+01 6.08047982e+01
 6.04889234e+01 6.01930580e+01 5.99268261e+01 5.96560716e+01
 5.94134976e+01 5.91788637e+01 5.89711982e+01 5.87924862e+01
 5.86076603e+01 5.83849875e+01 5.81425643e+01 5.79354883e+01
 5.76897576e+01 5.74231697e+01 5.71462003e+01 5.68919115e+01
 5.66524361e+01 5.64112268e+01 5.62293952e+01 5.60246999e+01
 5.58390200e+01 5.56793022e+01 5.55272664e+01 5.53772603e+01
 5.52317544e+01 5.51044417e+01 5.49755747e+01 5.48419997e+01
 5.46971204e+01 5.45727555e+01 5.44681866e+01 5.43397957e+01
 5.41916463e+01 5.40610138e+01 5.39523428e+01 5.38317476e+01
 5.37347766e+01 5.36589632e+01 5.35847426e+01 5.35706988e+01
 5.35234565e+01 5.34575519e+01 5.34078349e+01 5.34114616e+01
 5.34412725e+01 5.34732936e+01 5.35089236e+01 5.35474376e+01
 5.35877570e+01 5.36359175e+01 5.36776096e+01 5.37026903e+01
 5.37333455e+01 5.37504341e+01 5.37465212e+01 5.37446057e+01
 5.37446543e+01 5.37480725e+01 5.37616916e+01 5.37434007e+01
 5.36873261e+01 5.36270666e+01 5.35367892e+01 5.34392431e+01
 5.33206454e+01 5.32233417e+01 5.31487561e+01 5.30973132e+01
 5.30253612e+01 5.29036109e+01 5.27549105e+01 5.26716445e+01
 5.26605141e+01 5.26166615e+01 5.25444730e+01 5.24246969e+01
 5.22852888e+01 5.21525887e+01 5.19934002e+01 5.18190747e+01
 5.15895027e+01 5.13053910e+01 5.10067738e+01 5.07275824e+01
 5.04432930e+01 5.01304126e+01 4.98254436e+01 4.95442723e+01
 4.92756411e+01 4.90084259e+01 4.87248403e+01 4.84157625e+01
 4.80779224e+01 4.77047974e+01 4.72542290e+01 4.67650854e+01
 4.62566843e+01 4.57275154e+01 4.51961423e+01 4.46693031e+01
 4.41320400e+01 4.35931277e+01 4.30772543e+01 4.25677034e+01
 4.20544246e+01 4.15434505e+01 4.10467816e+01 4.05450996e+01
 4.00612692e+01 3.95727271e+01 3.90872341e+01 3.86051849e+01
 3.81294047e+01 3.76488636e+01 3.72083840e+01 3.68143162e+01
 3.64297397e+01 3.60473662e+01 3.56686097e+01 3.52829670e+01
 3.48998697e+01 3.44973672e+01 3.41184223e+01 3.37403258e+01
 3.33825051e+01 3.30191844e+01 3.26607813e+01 3.23132452e+01
 3.19761280e+01 3.16752057e+01 3.13647786e+01 3.10508525e+01
 3.07274114e+01 3.04066242e+01 3.00674938e+01 2.97285364e+01
 2.94285259e+01 2.91734606e+01 2.89474150e+01 2.87279173e+01
 2.85009824e+01 2.83047520e+01 2.81203802e+01 2.79580831e+01
 2.77735637e+01 2.75700422e+01 2.73402987e+01 2.70986962e+01
 2.68765687e+01 2.66611813e+01 2.64808848e+01 2.63026155e+01
 2.61286882e+01 2.59640383e+01 2.57945148e+01 2.56256666e+01
 2.54630250e+01 2.53603784e+01 2.52481331e+01 2.51151521e+01
 2.49659090e+01 2.48103653e+01 2.46762167e+01 2.45511221e+01
 2.44818068e+01 2.44267920e+01 2.43989778e+01 2.43905807e+01
 2.43888681e+01 2.43843793e+01 2.43701527e+01 2.43581152e+01
 2.43424224e+01 2.43095181e+01 2.42706695e+01 2.41954882e+01
 2.41040742e+01 2.40274349e+01 2.39540871e+01 2.38903546e+01
 2.38225607e+01 2.37552115e+01 2.37296142e+01 2.37323245e+01
 2.37621092e+01 2.37985382e+01 2.38499137e+01 2.38980492e+01
 2.39423265e+01 2.39566336e+01 2.39765785e+01 2.40386056e+01
 2.41298272e+01 2.42339501e+01 2.43423051e+01 2.44429064e+01
 2.45442128e+01 2.46232739e+01 2.46846565e+01 2.47448326e+01
 2.48055704e+01 2.48616105e+01 2.49213823e+01 2.49707337e+01
 2.50417418e+01 2.51201296e+01 2.52084970e+01 2.52879465e+01
 2.53596168e+01 2.54203326e+01 2.54860450e+01 2.55489791e+01
 2.56224794e+01 2.56962218e+01 2.57943204e+01 2.58874394e+01
 2.59766413e+01 2.60669060e+01 2.62056037e+01 2.63625660e+01
 2.65282653e+01 2.66719877e+01 2.68105494e+01 2.69671578e+01
 2.71177758e+01 2.72530744e+01 2.73654307e+01 2.75129584e+01
 2.76736723e+01 2.78256480e+01 2.79438238e+01 2.80318850e+01
 2.81169440e+01 2.82408639e+01 2.83566161e+01 2.84689937e+01
 2.85697354e+01 2.86638907e+01 2.87520590e+01 2.88245890e+01
 2.88177358e+01 2.88305857e+01 2.88649685e+01 2.88959874e+01
 2.89119602e+01 2.89162150e+01 2.89208966e+01 2.89736989e+01
 2.90505649e+01 2.91213487e+01 2.91930118e+01 2.92546826e+01
 2.92972318e+01 2.93723228e+01 2.94861961e+01 2.96428684e+01
 2.97981423e+01 2.99804231e+01 3.01689114e+01 3.03528433e+01
 3.05810261e+01 3.08352556e+01 3.10898409e+01 3.13119069e+01
 3.15167928e+01 3.17251549e+01 3.19043325e+01 3.20424755e+01
 3.20965095e+01 3.20863709e+01 3.20541328e+01 3.20026707e+01
 3.19217532e+01 3.18236485e+01 3.16547536e+01 3.14195227e+01
 3.11033797e+01 3.07480727e+01 3.03855807e+01 3.00157612e+01
 2.96308162e+01 2.91489626e+01 2.85244034e+01 2.78742604e+01
 2.71660132e+01 2.64365801e+01 2.56949617e+01 2.49430283e+01
 2.41288467e+01 2.31943061e+01 2.22315115e+01 2.12691380e+01
 2.03091517e+01 1.93757891e+01 1.84554405e+01 1.74985426e+01
 1.65443982e+01 1.56381613e+01 1.47439618e+01 1.38627893e+01
 1.30096085e+01 1.21945107e+01 1.13918150e+01 1.06097586e+01
 9.84824172e+00 9.11336435e+00 8.41971002e+00 7.75524808e+00
 7.12279768e+00 6.52962532e+00 5.98061152e+00 5.45996392e+00
 4.96288319e+00 4.47554097e+00 3.99838582e+00 3.53592540e+00
 3.09294469e+00 2.70989245e+00 2.36126782e+00 2.04909222e+00
 1.79517560e+00 1.56248349e+00 1.34128535e+00 1.16403509e+00
 1.01653453e+00 8.80544163e-01 7.42421632e-01 6.03831191e-01
 4.80382903e-01 3.69508736e-01 2.78767385e-01 1.92043118e-01
 1.22909297e-01 7.16370659e-02 3.56526069e-02 1.15451250e-02
 6.58478874e-04 3.43243536e-03 2.18952192e-02 5.62151429e-02
 1.05461489e-01 1.72993735e-01 2.53612457e-01 3.47929880e-01
 4.56473057e-01 5.72652724e-01 6.97417985e-01 8.28956558e-01
 9.60537519e-01 1.09576347e+00 1.23294063e+00 1.30916841e+00
 1.37176132e+00 1.43623396e+00 1.49844619e+00 1.55647061e+00
 1.61055183e+00 1.65263499e+00 1.67105209e+00 1.69611906e+00
 1.72162650e+00 1.75228416e+00 1.77722557e+00 1.79747825e+00
 1.81166621e+00 1.75851878e+00 1.68501587e+00 1.61197431e+00
 1.53194807e+00 1.44101475e+00 1.33869147e+00 1.23606146e+00
 1.11882999e+00 1.00032375e+00 8.94702380e-01 7.93415644e-01
 6.96302732e-01 6.03032291e-01 5.11093997e-01 3.94182471e-01
 2.89040210e-01 2.00266224e-01 1.27396350e-01 7.02739020e-02
 2.97256673e-02 6.12196418e-03 3.14211718e-04 1.33824171e-02
 4.65634139e-02 9.93141536e-02 1.70252341e-01 2.58708985e-01]
SPM{F} inference field
   SPM.effect    :   Main A
   SPM.z         :  (1x1000) raw test stat field
   SPM.df        :  (1.888, 116.883)
   SPM.fwhm      :  209.06111
   SPM.resels    :  (1, 4.77851)
Inference:
   SPM.alpha     :  0.050
   SPM.zstar     :  5.86545
   SPM.h0reject  :  True
   SPM.p_set     :  <0.001
   SPM.p_cluster :  (<0.001)
