# Supplementary material for: The Application of Statistical Parametric Mapping to Evaluate Differences in Topspin Backhand between Chinese and Polish Female Table Tennis Players
Source: Appl Bionics Biomech. 2021 Jul 14;2021:5555874. doi: 10.1155/2021/5555874 (PMC8339346; doi:10.1155/2021/5555874)
Supplement: Supplementary Materials — Angles and accelerations. [file 5555874.f1.zip › Elbow RT-Flexion (deg) cykleSPM.txt]

[3.97777287e+01 4.07645258e+01 4.14521665e+01 4.19450631e+01
 4.24683990e+01 4.28708532e+01 4.28075586e+01 4.23803920e+01
 4.16725315e+01 4.07406139e+01 3.96032844e+01 3.84766814e+01
 3.73378343e+01 3.61157631e+01 3.46809270e+01 3.28586693e+01
 3.11540107e+01 2.95126477e+01 2.80475243e+01 2.65585903e+01
 2.51772220e+01 2.38178831e+01 2.23187259e+01 2.09576197e+01
 1.97527310e+01 1.86153199e+01 1.75301087e+01 1.64795693e+01
 1.55260247e+01 1.45811205e+01 1.36973776e+01 1.28427395e+01
 1.19870473e+01 1.11176090e+01 1.02528250e+01 9.44242268e+00
 8.77406861e+00 8.13372155e+00 7.47359066e+00 6.80819411e+00
 6.16185005e+00 5.53863777e+00 4.94553047e+00 4.45207841e+00
 3.96243486e+00 3.49645748e+00 3.05777639e+00 2.64557996e+00
 2.27046439e+00 1.94249631e+00 1.65833937e+00 1.37950675e+00
 1.12124451e+00 8.84738473e-01 6.72806847e-01 4.85863518e-01
 3.34864780e-01 2.22813554e-01 1.31879192e-01 6.70061032e-02
 2.48036058e-02 3.42216413e-03 1.67668826e-03 1.85550179e-02
 5.47905241e-02 1.12274956e-01 1.89483581e-01 2.87501232e-01
 4.02674087e-01 5.29447623e-01 6.52103317e-01 7.68378156e-01
 8.87504762e-01 1.01073478e+00 1.14104488e+00 1.27961511e+00
 1.43134901e+00 1.59107096e+00 1.75068466e+00 1.91228747e+00
 2.09034710e+00 2.28131122e+00 2.47410255e+00 2.67378085e+00
 2.88236515e+00 3.08826772e+00 3.29706972e+00 3.52168445e+00
 3.75304674e+00 3.98167062e+00 4.19849389e+00 4.40453219e+00
 4.61247570e+00 4.82364522e+00 5.02805706e+00 5.22278731e+00
 5.43875987e+00 5.66341223e+00 5.88905543e+00 6.10299862e+00
 6.32288164e+00 6.54091071e+00 6.76872851e+00 6.99731579e+00
 7.22198967e+00 7.45122413e+00 7.68981268e+00 7.94061824e+00
 8.20965219e+00 8.49240512e+00 8.77446673e+00 9.06214927e+00
 9.36796414e+00 9.67676271e+00 9.98579538e+00 1.03044564e+01
 1.06425800e+01 1.09867288e+01 1.13524813e+01 1.17281792e+01
 1.21269785e+01 1.25420146e+01 1.29631420e+01 1.33959324e+01
 1.38160151e+01 1.42656139e+01 1.47526605e+01 1.52409651e+01
 1.57300750e+01 1.62178292e+01 1.67176225e+01 1.71993700e+01
 1.76804262e+01 1.81578455e+01 1.86597050e+01 1.91763329e+01
 1.96955174e+01 2.02065502e+01 2.07163177e+01 2.12049610e+01
 2.17221124e+01 2.22315002e+01 2.27230486e+01 2.31966399e+01
 2.36118216e+01 2.40036076e+01 2.43449561e+01 2.46535978e+01
 2.49551129e+01 2.52482402e+01 2.55311368e+01 2.57952994e+01
 2.60383402e+01 2.62821459e+01 2.65280332e+01 2.67815561e+01
 2.70371044e+01 2.72953194e+01 2.75536389e+01 2.78221891e+01
 2.81245435e+01 2.84470108e+01 2.87786795e+01 2.91204081e+01
 2.94632818e+01 2.97983198e+01 3.01298155e+01 3.04426212e+01
 3.07729710e+01 3.11151536e+01 3.14514189e+01 3.17856952e+01
 3.21220322e+01 3.24668452e+01 3.28199268e+01 3.31671474e+01
 3.35061937e+01 3.38402127e+01 3.41540560e+01 3.44650314e+01
 3.47743376e+01 3.50787068e+01 3.54013856e+01 3.57351984e+01
 3.60747008e+01 3.64179604e+01 3.67397047e+01 3.70782760e+01
 3.74475660e+01 3.78367922e+01 3.82735823e+01 3.87198747e+01
 3.91582832e+01 3.95807143e+01 3.99872538e+01 4.04406389e+01
 4.09444964e+01 4.14594636e+01 4.19529636e+01 4.23861405e+01
 4.27936471e+01 4.32123661e+01 4.36232748e+01 4.39759613e+01
 4.42980486e+01 4.46435743e+01 4.49881684e+01 4.53296634e+01
 4.56790646e+01 4.61008603e+01 4.65547469e+01 4.70459435e+01
 4.75250369e+01 4.80146764e+01 4.84740317e+01 4.89491458e+01
 4.94531654e+01 4.99560469e+01 5.04079997e+01 5.08076975e+01
 5.12205288e+01 5.16359856e+01 5.20115637e+01 5.23808214e+01
 5.27301072e+01 5.30622963e+01 5.33786236e+01 5.36870214e+01
 5.39796165e+01 5.42537919e+01 5.44933677e+01 5.46431933e+01
 5.47540057e+01 5.49385646e+01 5.51248793e+01 5.52784745e+01
 5.54268075e+01 5.55558161e+01 5.56483611e+01 5.57196118e+01
 5.57153329e+01 5.57025679e+01 5.56545681e+01 5.55274453e+01
 5.54024412e+01 5.52735014e+01 5.51094116e+01 5.49359901e+01
 5.47398956e+01 5.45237922e+01 5.43144294e+01 5.40069899e+01
 5.36227102e+01 5.32381623e+01 5.28298552e+01 5.24299580e+01
 5.20105428e+01 5.15652888e+01 5.11726269e+01 5.07880302e+01
 5.03648515e+01 4.99248134e+01 4.95049835e+01 4.90927068e+01
 4.86568032e+01 4.82329964e+01 4.77857909e+01 4.73356656e+01
 4.68945270e+01 4.64637338e+01 4.60442221e+01 4.56037096e+01
 4.51871395e+01 4.47614110e+01 4.43740530e+01 4.39725974e+01
 4.35844030e+01 4.31759176e+01 4.27442167e+01 4.23355683e+01
 4.19543718e+01 4.15901970e+01 4.12071089e+01 4.08232231e+01
 4.04621066e+01 4.00940346e+01 3.97179670e+01 3.93353010e+01
 3.89441015e+01 3.85545770e+01 3.81767079e+01 3.78372477e+01
 3.75400711e+01 3.73083483e+01 3.70814788e+01 3.68778636e+01
 3.66836248e+01 3.65129380e+01 3.63608083e+01 3.62414370e+01
 3.61634392e+01 3.60861602e+01 3.59971059e+01 3.58905672e+01
 3.57720904e+01 3.56423444e+01 3.54868258e+01 3.53113896e+01
 3.51447456e+01 3.49865817e+01 3.48125861e+01 3.46592893e+01
 3.45218694e+01 3.44072711e+01 3.43014774e+01 3.41885019e+01
 3.40791798e+01 3.39890294e+01 3.39094828e+01 3.38325650e+01
 3.37672497e+01 3.37121759e+01 3.36550063e+01 3.35860955e+01
 3.35142972e+01 3.34413961e+01 3.33568176e+01 3.32706942e+01
 3.32226482e+01 3.31766737e+01 3.31367703e+01 3.30992366e+01
 3.30734469e+01 3.30511470e+01 3.30627774e+01 3.30648057e+01
 3.30686563e+01 3.30917864e+01 3.31049880e+01 3.31124100e+01
 3.31225596e+01 3.31393591e+01 3.31661829e+01 3.32077069e+01
 3.32574076e+01 3.33090855e+01 3.33827869e+01 3.34825337e+01
 3.36067085e+01 3.37252424e+01 3.38300432e+01 3.39358206e+01
 3.40376091e+01 3.41315072e+01 3.42333815e+01 3.43667857e+01
 3.45002748e+01 3.46428871e+01 3.48054917e+01 3.49546599e+01
 3.50903116e+01 3.51913864e+01 3.52450015e+01 3.52941627e+01
 3.53515203e+01 3.54186535e+01 3.54572378e+01 3.54749845e+01
 3.54644916e+01 3.54772906e+01 3.54891778e+01 3.54905234e+01
 3.55018459e+01 3.55253626e+01 3.55394056e+01 3.55137509e+01
 3.55033468e+01 3.54871903e+01 3.54734397e+01 3.54644159e+01
 3.54583436e+01 3.54364551e+01 3.53890439e+01 3.53363539e+01
 3.52739606e+01 3.52148301e+01 3.51712117e+01 3.51252979e+01
 3.50629863e+01 3.50069650e+01 3.49867570e+01 3.49498621e+01
 3.49139207e+01 3.48826880e+01 3.48447031e+01 3.48195613e+01
 3.48088660e+01 3.48280923e+01 3.48669328e+01 3.48948798e+01
 3.49330433e+01 3.50086756e+01 3.50587881e+01 3.50880601e+01
 3.51548470e+01 3.52189080e+01 3.52664868e+01 3.52976601e+01
 3.53420465e+01 3.53691895e+01 3.53708839e+01 3.53681058e+01
 3.53430181e+01 3.53140465e+01 3.52880189e+01 3.52683140e+01
 3.52151961e+01 3.51443038e+01 3.50655730e+01 3.49811790e+01
 3.49023262e+01 3.48102215e+01 3.47031954e+01 3.45591137e+01
 3.43862068e+01 3.42075836e+01 3.40240113e+01 3.38246711e+01
 3.36267578e+01 3.34217956e+01 3.32211887e+01 3.30127757e+01
 3.28055039e+01 3.25924353e+01 3.23839169e+01 3.21866800e+01
 3.19828887e+01 3.17526580e+01 3.15132374e+01 3.12748024e+01
 3.10344790e+01 3.07861700e+01 3.05181928e+01 3.02372259e+01
 2.99598226e+01 2.96907134e+01 2.94409592e+01 2.91907345e+01
 2.89480106e+01 2.87133956e+01 2.84760998e+01 2.82320833e+01
 2.79924392e+01 2.77547690e+01 2.75213707e+01 2.72963541e+01
 2.70692087e+01 2.68385793e+01 2.65993931e+01 2.63610305e+01
 2.61232410e+01 2.58927617e+01 2.56665916e+01 2.54469917e+01
 2.52389693e+01 2.50032051e+01 2.47629434e+01 2.45225552e+01
 2.42815359e+01 2.40371754e+01 2.37981517e+01 2.35977836e+01
 2.34014665e+01 2.32068563e+01 2.30087622e+01 2.28135065e+01
 2.26088604e+01 2.23994579e+01 2.22062025e+01 2.20165579e+01
 2.18347370e+01 2.16555540e+01 2.14764340e+01 2.13090235e+01
 2.11484446e+01 2.09864874e+01 2.08354243e+01 2.06740509e+01
 2.05240413e+01 2.03749307e+01 2.02198125e+01 2.00536028e+01
 1.98829606e+01 1.97165073e+01 1.95463439e+01 1.93647863e+01
 1.91838647e+01 1.90102218e+01 1.88402224e+01 1.86708739e+01
 1.84945968e+01 1.83058735e+01 1.81140209e+01 1.79224598e+01
 1.77327135e+01 1.75434387e+01 1.73412015e+01 1.71520882e+01
 1.69691868e+01 1.67830440e+01 1.65972900e+01 1.64050290e+01
 1.62016773e+01 1.60137784e+01 1.58281279e+01 1.56573981e+01
 1.54876650e+01 1.53187446e+01 1.51645287e+01 1.50201037e+01
 1.48703296e+01 1.47258307e+01 1.45789597e+01 1.44300762e+01
 1.42807376e+01 1.41370088e+01 1.40015232e+01 1.38831991e+01
 1.37629038e+01 1.36328787e+01 1.35053652e+01 1.33844030e+01
 1.32619506e+01 1.31444956e+01 1.30224303e+01 1.29015164e+01
 1.27787267e+01 1.26542339e+01 1.25319419e+01 1.24129849e+01
 1.22939744e+01 1.21822115e+01 1.20716524e+01 1.19626231e+01
 1.18622492e+01 1.17722313e+01 1.16979564e+01 1.16235938e+01
 1.15466831e+01 1.14609351e+01 1.13660517e+01 1.12659181e+01
 1.11593098e+01 1.10400739e+01 1.09137907e+01 1.07871628e+01
 1.06715970e+01 1.05744095e+01 1.04789513e+01 1.03842370e+01
 1.02905785e+01 1.01936938e+01 1.00932323e+01 9.99382400e+00
 9.89246865e+00 9.79281883e+00 9.69471701e+00 9.59574708e+00
 9.49694713e+00 9.39920936e+00 9.30084542e+00 9.20147314e+00
 9.09949601e+00 9.00249815e+00 8.90612367e+00 8.80862469e+00
 8.71132422e+00 8.61051002e+00 8.50331660e+00 8.39421463e+00
 8.28554001e+00 8.18066146e+00 8.07570651e+00 7.97058765e+00
 7.90102017e+00 7.85380604e+00 7.80602473e+00 7.75805047e+00
 7.71448288e+00 7.67628831e+00 7.63489534e+00 7.59461630e+00
 7.55010909e+00 7.50503692e+00 7.46532028e+00 7.42837538e+00
 7.39185729e+00 7.35840418e+00 7.32921265e+00 7.30256732e+00
 7.27163558e+00 7.24719942e+00 7.22588016e+00 7.20244488e+00
 7.17729153e+00 7.16267902e+00 7.15105365e+00 7.13963912e+00
 7.12491771e+00 7.10898552e+00 7.09141314e+00 7.07349292e+00
 7.06212730e+00 7.05304844e+00 7.04345276e+00 7.03691208e+00
 7.02913942e+00 7.02120015e+00 7.01091673e+00 6.99696201e+00
 6.98095880e+00 6.96532060e+00 6.95044448e+00 6.93526527e+00
 6.92288194e+00 6.90800878e+00 6.89860416e+00 6.89114436e+00
 6.88273776e+00 6.87182537e+00 6.87020186e+00 6.87324343e+00
 6.87584989e+00 6.88441465e+00 6.89330475e+00 6.90442074e+00
 6.91933798e+00 6.93626951e+00 6.95305942e+00 6.96780816e+00
 6.98187887e+00 6.99173702e+00 6.99579188e+00 7.00038357e+00
 7.01664439e+00 7.03615272e+00 7.05341536e+00 7.07536889e+00
 7.10062924e+00 7.13171543e+00 7.15726081e+00 7.18195503e+00
 7.20504786e+00 7.22961681e+00 7.25919740e+00 7.28462883e+00
 7.31406978e+00 7.33689820e+00 7.35399027e+00 7.36737242e+00
 7.38189311e+00 7.39680842e+00 7.40594844e+00 7.40895019e+00
 7.41501400e+00 7.41778623e+00 7.41883437e+00 7.42383092e+00
 7.43610519e+00 7.44740856e+00 7.45790246e+00 7.46824067e+00
 7.47498165e+00 7.47868343e+00 7.47523933e+00 7.45984963e+00
 7.45114344e+00 7.43702992e+00 7.41981001e+00 7.39455503e+00
 7.36413589e+00 7.34515447e+00 7.33090646e+00 7.31518943e+00
 7.29993900e+00 7.27889733e+00 7.24156921e+00 7.20109834e+00
 7.15751237e+00 7.11153687e+00 7.06252353e+00 7.01003106e+00
 6.95703368e+00 6.89917170e+00 6.84254256e+00 6.77599824e+00
 6.70609886e+00 6.64518298e+00 6.58494414e+00 6.52218656e+00
 6.46775281e+00 6.41530109e+00 6.36316231e+00 6.31084718e+00
 6.24670145e+00 6.17879473e+00 6.10990977e+00 6.04805314e+00
 5.99209761e+00 5.94164741e+00 5.88605372e+00 5.83278228e+00
 5.78182247e+00 5.73154552e+00 5.68150447e+00 5.62914999e+00
 5.56698155e+00 5.49611192e+00 5.42447447e+00 5.35244377e+00
 5.28370196e+00 5.23007104e+00 5.17812668e+00 5.12365473e+00
 5.07587723e+00 5.03079727e+00 4.98407383e+00 4.93840661e+00
 4.89125809e+00 4.84102480e+00 4.77785722e+00 4.70853877e+00
 4.63385007e+00 4.55714321e+00 4.48782707e+00 4.42145106e+00
 4.35201248e+00 4.27707273e+00 4.20691121e+00 4.14986326e+00
 4.08770333e+00 4.02279419e+00 3.96808617e+00 3.90414910e+00
 3.82616290e+00 3.74695195e+00 3.66290910e+00 3.57754991e+00
 3.48977208e+00 3.40307537e+00 3.32236681e+00 3.24801473e+00
 3.17648143e+00 3.10618858e+00 3.03407888e+00 2.96158429e+00
 2.89148352e+00 2.81521914e+00 2.73213688e+00 2.65748539e+00
 2.58951191e+00 2.52406882e+00 2.45922591e+00 2.39286399e+00
 2.32290944e+00 2.26418610e+00 2.21387725e+00 2.16274975e+00
 2.10918408e+00 2.05820501e+00 2.00395830e+00 1.95129866e+00
 1.90036881e+00 1.85159956e+00 1.80396180e+00 1.75670711e+00
 1.71003849e+00 1.66701809e+00 1.62312481e+00 1.58704911e+00
 1.54952873e+00 1.50465638e+00 1.45763179e+00 1.41285421e+00
 1.36895934e+00 1.32217385e+00 1.26465667e+00 1.21643971e+00
 1.17626192e+00 1.13587215e+00 1.10088278e+00 1.06745423e+00
 1.03743209e+00 1.00227299e+00 9.64197788e-01 9.26360390e-01
 8.92172488e-01 8.50466792e-01 8.10234126e-01 7.73993440e-01
 7.39476980e-01 7.03454772e-01 6.66334165e-01 6.34719190e-01
 6.09132746e-01 5.85075487e-01 5.64007561e-01 5.53222675e-01
 5.42631844e-01 5.32333211e-01 5.24777244e-01 5.16984589e-01
 5.07665423e-01 4.98198411e-01 4.88738441e-01 4.89783142e-01
 4.93496928e-01 4.99278947e-01 5.06745928e-01 5.16198824e-01
 5.29159496e-01 5.41406432e-01 5.54446252e-01 5.69328511e-01
 5.89697500e-01 6.20717901e-01 6.49669807e-01 6.68800539e-01
 6.85891279e-01 7.07005029e-01 7.30094015e-01 7.59048634e-01
 7.94243969e-01 8.28719336e-01 8.72380157e-01 9.26860106e-01
 9.90194499e-01 1.05555859e+00 1.11929881e+00 1.18226341e+00
 1.25238979e+00 1.31022794e+00 1.36371983e+00 1.41572723e+00
 1.46790595e+00 1.51733221e+00 1.56581221e+00 1.61141218e+00
 1.67349219e+00 1.73366597e+00 1.78990627e+00 1.84609935e+00
 1.90053437e+00 1.94303755e+00 1.97014510e+00 1.97666641e+00
 1.97876074e+00 1.97274374e+00 1.96538207e+00 1.95708211e+00
 1.95120718e+00 1.92798212e+00 1.87035910e+00 1.79924848e+00
 1.72578034e+00 1.64372690e+00 1.55954733e+00 1.47626043e+00
 1.38681894e+00 1.28179581e+00 1.17463407e+00 1.07378261e+00
 9.64594186e-01 8.58259086e-01 7.53873588e-01 6.43471994e-01
 5.10638922e-01 3.92260373e-01 2.92429833e-01 2.07374820e-01
 1.32018012e-01 7.22536696e-02 2.71389316e-02 2.82818970e-03
 4.49000703e-03 3.45593121e-02 9.35201229e-02 1.86858699e-01
 3.20848145e-01 5.05541461e-01 7.44190159e-01 1.04735421e+00
 1.41070838e+00 1.83611561e+00 2.34890472e+00 2.93898241e+00
 3.58552877e+00 4.30917288e+00 5.14003937e+00 6.08919029e+00
 7.16121633e+00 8.39627383e+00 9.75772528e+00 1.11569589e+01
 1.26463749e+01 1.43273721e+01 1.61671433e+01 1.81572275e+01
 2.03163324e+01 2.25997611e+01 2.49412824e+01 2.72201500e+01
 2.96012373e+01 3.21487102e+01 3.48593672e+01 3.76834284e+01
 4.06281850e+01 4.33680426e+01 4.58793554e+01 4.85089078e+01
 5.12576911e+01 5.43437137e+01 5.75829752e+01 6.09141684e+01
 6.37965479e+01 6.61835691e+01 6.85262911e+01 7.09313181e+01
 7.36067686e+01 7.63466490e+01 7.92286254e+01 8.20276246e+01
 8.48188953e+01 8.77610005e+01 9.08136428e+01 9.39430730e+01
 9.71336912e+01 1.00223524e+02 1.03205277e+02 1.06166013e+02
 1.09070868e+02 1.11817483e+02 1.14424417e+02 1.17066221e+02
 1.19732754e+02 1.21763948e+02 1.23285961e+02 1.24736981e+02
 1.26252430e+02 1.27912343e+02 1.29707357e+02 1.31518691e+02
 1.32863501e+02 1.34070901e+02 1.35165990e+02 1.36293782e+02
 1.37577244e+02 1.38770263e+02 1.40190417e+02 1.41162111e+02
 1.41851758e+02 1.42436353e+02 1.42835112e+02 1.43126915e+02
 1.43780683e+02 1.44584739e+02 1.44154122e+02 1.42711283e+02
 1.41019642e+02 1.38959539e+02 1.36459863e+02 1.33982171e+02
 1.31502287e+02 1.28271746e+02 1.24173518e+02 1.19747390e+02
 1.14848256e+02 1.09558594e+02 1.03922399e+02 9.80860193e+01
 9.32218229e+01 8.82872840e+01 8.33312454e+01 7.82163128e+01
 7.28326959e+01 6.73354591e+01 6.16197211e+01 5.83510514e+01
 5.54883065e+01 5.25938384e+01 4.97287550e+01 4.67184173e+01
 4.35469447e+01 4.01866806e+01 3.94397864e+01 3.87335875e+01
 3.79198266e+01 3.70610887e+01 3.61000335e+01 3.49641787e+01]
SPM{F} inference field
   SPM.effect    :   Main A
   SPM.z         :  (1x1000) raw test stat field
   SPM.df        :  (1.918, 116.943)
   SPM.fwhm      :  161.55808
   SPM.resels    :  (1, 6.18353)
Inference:
   SPM.alpha     :  0.050
   SPM.zstar     :  6.11213
   SPM.h0reject  :  True
   SPM.p_set     :  <0.001
   SPM.p_cluster :  (0.039, <0.001, 0.011)
