# Supplementary material for: The Application of Statistical Parametric Mapping to Evaluate Differences in Topspin Backhand between Chinese and Polish Female Table Tennis Players
Source: Appl Bionics Biomech. 2021 Jul 14;2021:5555874. doi: 10.1155/2021/5555874 (PMC8339346; doi:10.1155/2021/5555874)
Supplement: Supplementary Materials — Angles and accelerations. [file 5555874.f1.zip › Hip LT-Abduction (deg) cykleSPM.txt]

[3.93341329e+00 3.93620470e+00 3.95143711e+00 3.97964052e+00
 4.02848092e+00 4.09701264e+00 4.17953088e+00 4.26418637e+00
 4.36690719e+00 4.48131865e+00 4.60299721e+00 4.73572227e+00
 4.88381672e+00 5.04927822e+00 5.24628970e+00 5.37983098e+00
 5.53129606e+00 5.69720266e+00 5.88695912e+00 6.08040002e+00
 6.28564916e+00 6.46695082e+00 6.55905049e+00 6.66634172e+00
 6.81647831e+00 6.96123844e+00 7.10804898e+00 7.25750450e+00
 7.39379765e+00 7.47559454e+00 7.55966303e+00 7.65163280e+00
 7.76824604e+00 7.91255149e+00 8.05148806e+00 8.17761303e+00
 8.24082612e+00 8.28743084e+00 8.34867598e+00 8.42281560e+00
 8.50143082e+00 8.60856089e+00 8.69224713e+00 8.76118106e+00
 8.81714944e+00 8.84849812e+00 8.88607480e+00 8.92650888e+00
 8.97466105e+00 9.06927287e+00 9.15713449e+00 9.23541261e+00
 9.31402467e+00 9.38399655e+00 9.45447389e+00 9.55189193e+00
 9.65703362e+00 9.85719336e+00 1.00499193e+01 1.02447695e+01
 1.04442952e+01 1.06347322e+01 1.08235814e+01 1.10912090e+01
 1.14485479e+01 1.18071584e+01 1.21809600e+01 1.26035014e+01
 1.30296717e+01 1.34720812e+01 1.39999232e+01 1.46348205e+01
 1.53008640e+01 1.60288721e+01 1.68139319e+01 1.76264017e+01
 1.84772305e+01 1.94453294e+01 2.06427994e+01 2.18713854e+01
 2.31262811e+01 2.44285005e+01 2.57621966e+01 2.71213251e+01
 2.84937878e+01 2.98898511e+01 3.12790853e+01 3.26376853e+01
 3.39944098e+01 3.53569551e+01 3.67534698e+01 3.81500403e+01
 3.93717789e+01 4.05413420e+01 4.16476178e+01 4.26481322e+01
 4.35207934e+01 4.43294661e+01 4.51503120e+01 4.59889793e+01
 4.67363092e+01 4.73946618e+01 4.79467513e+01 4.84193865e+01
 4.88231754e+01 4.90626186e+01 4.90583667e+01 4.90209541e+01
 4.89088513e+01 4.86905552e+01 4.84229849e+01 4.80062281e+01
 4.74432121e+01 4.68681748e+01 4.61460418e+01 4.53382895e+01
 4.44974726e+01 4.36115291e+01 4.26272919e+01 4.15819276e+01
 4.03908479e+01 3.92028358e+01 3.80112149e+01 3.68474803e+01
 3.57996246e+01 3.47858371e+01 3.40174084e+01 3.32458408e+01
 3.25049965e+01 3.17640106e+01 3.10487688e+01 3.03989120e+01
 3.01280148e+01 2.99080888e+01 2.98759565e+01 2.98542106e+01
 2.97975905e+01 2.96786045e+01 2.95649900e+01 2.96531187e+01
 2.98791663e+01 3.04584547e+01 3.09770399e+01 3.14438042e+01
 3.17214596e+01 3.19360030e+01 3.19952845e+01 3.21080741e+01
 3.22397513e+01 3.23217053e+01 3.23012169e+01 3.21616263e+01
 3.19756190e+01 3.18297304e+01 3.19816981e+01 3.20711226e+01
 3.21482611e+01 3.21381973e+01 3.20461539e+01 3.19153209e+01
 3.19272933e+01 3.20842636e+01 3.22401046e+01 3.23544111e+01
 3.24640941e+01 3.25224484e+01 3.26434769e+01 3.28218882e+01
 3.29686136e+01 3.32333168e+01 3.34745706e+01 3.36599034e+01
 3.38248343e+01 3.39766728e+01 3.41949331e+01 3.45785909e+01
 3.49734937e+01 3.53457328e+01 3.56777125e+01 3.60026928e+01
 3.64021353e+01 3.70706570e+01 3.80009006e+01 3.88842988e+01
 3.98139212e+01 4.08397917e+01 4.19080860e+01 4.29638726e+01
 4.40454150e+01 4.52120745e+01 4.67369887e+01 4.82598388e+01
 4.97529405e+01 5.12533152e+01 5.29352719e+01 5.44633205e+01
 5.58776378e+01 5.74923995e+01 5.90926677e+01 6.06612055e+01
 6.21855896e+01 6.38900250e+01 6.54687324e+01 6.68795563e+01
 6.81697840e+01 6.94095979e+01 7.05641871e+01 7.16144114e+01
 7.25536956e+01 7.34253436e+01 7.42970345e+01 7.53769531e+01
 7.63802655e+01 7.73460428e+01 7.82708662e+01 7.90179855e+01
 7.97526957e+01 8.05539808e+01 8.15015724e+01 8.24140704e+01
 8.32706526e+01 8.40722915e+01 8.47313244e+01 8.52647810e+01
 8.57173874e+01 8.60354762e+01 8.62829873e+01 8.64980978e+01
 8.66852763e+01 8.69076070e+01 8.69838737e+01 8.70182100e+01
 8.69275976e+01 8.68729865e+01 8.67928708e+01 8.66729628e+01
 8.65866833e+01 8.65809306e+01 8.64153675e+01 8.59788052e+01
 8.55601994e+01 8.51345592e+01 8.46948441e+01 8.42697087e+01
 8.40210102e+01 8.38276140e+01 8.37039203e+01 8.34907487e+01
 8.32460403e+01 8.30956513e+01 8.29522195e+01 8.28403394e+01
 8.27747511e+01 8.26550497e+01 8.25220547e+01 8.23491361e+01
 8.22022201e+01 8.20579776e+01 8.18476240e+01 8.16121245e+01
 8.13290987e+01 8.10244892e+01 8.07019390e+01 8.03922623e+01
 8.00676464e+01 7.96511473e+01 7.92362802e+01 7.87721410e+01
 7.82748274e+01 7.77852524e+01 7.73304993e+01 7.68071959e+01
 7.61183688e+01 7.53415087e+01 7.45245337e+01 7.36483201e+01
 7.28289055e+01 7.19170090e+01 7.08976882e+01 6.96924488e+01
 6.83993916e+01 6.70327958e+01 6.57288067e+01 6.43965224e+01
 6.30240548e+01 6.16146201e+01 6.02468045e+01 5.88107689e+01
 5.73650198e+01 5.58833541e+01 5.44152521e+01 5.29911596e+01
 5.16114348e+01 5.02760158e+01 4.90218790e+01 4.77458033e+01
 4.64064849e+01 4.50732979e+01 4.36799764e+01 4.22103074e+01
 4.06565579e+01 3.91939046e+01 3.77071111e+01 3.62519806e+01
 3.48606838e+01 3.35211797e+01 3.21288858e+01 3.07638898e+01
 2.94375868e+01 2.80757560e+01 2.67648265e+01 2.55060019e+01
 2.42681224e+01 2.30698312e+01 2.18735652e+01 2.06896330e+01
 1.94895088e+01 1.83444226e+01 1.72175420e+01 1.61614922e+01
 1.51768282e+01 1.42458283e+01 1.33398614e+01 1.25351545e+01
 1.17834431e+01 1.10569650e+01 1.03932455e+01 9.75567214e+00
 9.06982306e+00 8.38625395e+00 7.72953324e+00 7.10570149e+00
 6.56579458e+00 6.07089186e+00 5.61448966e+00 5.15757756e+00
 4.70995167e+00 4.29584258e+00 3.89857987e+00 3.58089729e+00
 3.27569277e+00 2.98514892e+00 2.72228375e+00 2.46847290e+00
 2.22975903e+00 2.02397111e+00 1.85739770e+00 1.69038559e+00
 1.54155418e+00 1.38724394e+00 1.24698267e+00 1.12992369e+00
 1.02142532e+00 9.16005198e-01 8.10937401e-01 7.11914564e-01
 6.17941115e-01 5.39054494e-01 4.92053294e-01 4.44943947e-01
 3.96943175e-01 3.44616536e-01 2.91151720e-01 2.38784512e-01
 2.10143968e-01 2.02036281e-01 1.94530005e-01 1.89680024e-01
 1.82566936e-01 1.71164555e-01 1.61880178e-01 1.51752989e-01
 1.42110602e-01 1.32288720e-01 1.21778091e-01 1.08136266e-01
 9.96230468e-02 8.93181549e-02 7.63812167e-02 5.80539239e-02
 4.02151595e-02 2.29705105e-02 8.63410283e-03 2.37951078e-03
 1.46597647e-06 2.33125347e-03 9.84463663e-03 2.30364701e-02
 4.00688995e-02 5.87590605e-02 7.73299891e-02 9.58522601e-02
 1.12578590e-01 1.25621880e-01 1.33465221e-01 1.32141188e-01
 1.23868407e-01 1.06451344e-01 8.63994618e-02 6.60398579e-02
 4.65640851e-02 2.64071471e-02 1.28110233e-02 4.12679147e-03
 1.41748327e-05 2.53442619e-03 9.79901586e-03 2.11225913e-02
 3.82632844e-02 6.30050560e-02 9.35359168e-02 1.25663879e-01
 1.64967784e-01 2.11672526e-01 2.70092187e-01 3.35227805e-01
 4.04762152e-01 4.98079456e-01 6.18395116e-01 7.53031901e-01
 9.15021485e-01 1.10871032e+00 1.30914769e+00 1.50350736e+00
 1.68521005e+00 1.86156558e+00 2.04178370e+00 2.24803489e+00
 2.46830925e+00 2.69476165e+00 2.92486448e+00 3.18175698e+00
 3.46346237e+00 3.75206623e+00 4.01144444e+00 4.24034645e+00
 4.45974301e+00 4.69507725e+00 4.93522976e+00 5.17002204e+00
 5.40710081e+00 5.65980882e+00 5.93588975e+00 6.23572122e+00
 6.54750967e+00 6.87540686e+00 7.23381597e+00 7.59569662e+00
 7.98033913e+00 8.36703251e+00 8.76219477e+00 9.16305856e+00
 9.62264941e+00 1.01349628e+01 1.06677072e+01 1.12097218e+01
 1.17428138e+01 1.22976394e+01 1.28638673e+01 1.34337689e+01
 1.40114819e+01 1.46083964e+01 1.52164730e+01 1.58016779e+01
 1.63509213e+01 1.68708865e+01 1.73685484e+01 1.78704057e+01
 1.83403753e+01 1.88010852e+01 1.92157855e+01 1.95819880e+01
 1.99074428e+01 2.01986979e+01 2.04708157e+01 2.07247887e+01
 2.08712097e+01 2.08953145e+01 2.08997541e+01 2.09057659e+01
 2.08990591e+01 2.08840185e+01 2.08354954e+01 2.08380172e+01
 2.09242242e+01 2.09809254e+01 2.10624294e+01 2.11170181e+01
 2.11606782e+01 2.12370432e+01 2.13869057e+01 2.15585627e+01
 2.16905408e+01 2.18119101e+01 2.18928120e+01 2.19621177e+01
 2.20375422e+01 2.21896804e+01 2.24121297e+01 2.26044090e+01
 2.27622847e+01 2.28373271e+01 2.28672093e+01 2.28906492e+01
 2.29660010e+01 2.31226894e+01 2.32801539e+01 2.34911382e+01
 2.36805110e+01 2.38499193e+01 2.40070147e+01 2.41621501e+01
 2.43169753e+01 2.43916977e+01 2.44448379e+01 2.44730829e+01
 2.44767957e+01 2.44557562e+01 2.44071332e+01 2.43012815e+01
 2.41918931e+01 2.40840274e+01 2.40028114e+01 2.38968561e+01
 2.37905292e+01 2.36359253e+01 2.34364330e+01 2.32418976e+01
 2.30547797e+01 2.28617964e+01 2.26933097e+01 2.25932107e+01
 2.24095242e+01 2.22341717e+01 2.20784804e+01 2.19099129e+01
 2.17310252e+01 2.16219510e+01 2.15094200e+01 2.14287956e+01
 2.13766798e+01 2.13194150e+01 2.12174833e+01 2.10748663e+01
 2.09306353e+01 2.07669770e+01 2.06319509e+01 2.05022850e+01
 2.03354084e+01 2.00920948e+01 1.98263978e+01 1.95482405e+01
 1.92419629e+01 1.88655615e+01 1.84743115e+01 1.81048258e+01
 1.77958637e+01 1.75348220e+01 1.72662388e+01 1.70200565e+01
 1.68102918e+01 1.66293363e+01 1.64493211e+01 1.63230581e+01
 1.62441180e+01 1.61660552e+01 1.61476231e+01 1.62019604e+01
 1.62573069e+01 1.63006174e+01 1.63900066e+01 1.65147963e+01
 1.66323536e+01 1.67620615e+01 1.68794315e+01 1.69959783e+01
 1.71200388e+01 1.72891225e+01 1.74736002e+01 1.76359628e+01
 1.78063850e+01 1.79737462e+01 1.81523792e+01 1.83064117e+01
 1.83651925e+01 1.83725845e+01 1.83535694e+01 1.83175834e+01
 1.83960176e+01 1.85305042e+01 1.86465624e+01 1.87002603e+01
 1.87362804e+01 1.87458650e+01 1.87474493e+01 1.88094665e+01
 1.89234891e+01 1.90345329e+01 1.90797809e+01 1.91100619e+01
 1.91312503e+01 1.90942347e+01 1.90726302e+01 1.90522651e+01
 1.90122673e+01 1.89887096e+01 1.89708744e+01 1.89621177e+01
 1.89593698e+01 1.88839891e+01 1.87523996e+01 1.86224300e+01
 1.85178033e+01 1.84140676e+01 1.83062839e+01 1.81460934e+01
 1.79809126e+01 1.77977497e+01 1.76343879e+01 1.75602375e+01
 1.74901992e+01 1.74088555e+01 1.73043365e+01 1.71927128e+01
 1.70897497e+01 1.70009069e+01 1.71736168e+01 1.73287717e+01
 1.74615240e+01 1.75760580e+01 1.76826180e+01 1.78011910e+01
 1.79219663e+01 1.81668940e+01 1.83799928e+01 1.85679993e+01
 1.87602128e+01 1.89971127e+01 1.92498460e+01 1.95010958e+01
 1.97594786e+01 1.99997435e+01 2.02492460e+01 2.05053649e+01
 2.07962277e+01 2.11020421e+01 2.14012293e+01 2.17080136e+01
 2.20031975e+01 2.23421597e+01 2.27079272e+01 2.30648593e+01
 2.34125361e+01 2.37338052e+01 2.40279061e+01 2.43170514e+01
 2.46527823e+01 2.50175663e+01 2.54071181e+01 2.58198055e+01
 2.62188380e+01 2.65720441e+01 2.68847870e+01 2.72968976e+01
 2.77050356e+01 2.80676035e+01 2.84066266e+01 2.87106419e+01
 2.89301393e+01 2.91222566e+01 2.92150844e+01 2.93066764e+01
 2.93409550e+01 2.93289820e+01 2.92808519e+01 2.92302547e+01
 2.91670634e+01 2.91305230e+01 2.91055967e+01 2.91031857e+01
 2.91072450e+01 2.91352245e+01 2.92358310e+01 2.93230985e+01
 2.94118536e+01 2.95138405e+01 2.96379887e+01 2.97773094e+01
 2.99808915e+01 3.02431822e+01 3.05008296e+01 3.07463531e+01
 3.10060268e+01 3.12913772e+01 3.15887267e+01 3.19261760e+01
 3.22509197e+01 3.26033090e+01 3.29893771e+01 3.33648751e+01
 3.37323855e+01 3.40895089e+01 3.44819734e+01 3.49278466e+01
 3.53532007e+01 3.57367035e+01 3.61172507e+01 3.64479961e+01
 3.67518528e+01 3.70872509e+01 3.73953087e+01 3.76911246e+01
 3.79646932e+01 3.82148147e+01 3.84860895e+01 3.88138201e+01
 3.91124950e+01 3.93903267e+01 3.97191639e+01 4.00466955e+01
 4.03677606e+01 4.06102506e+01 4.08925312e+01 4.10492821e+01
 4.11777114e+01 4.12785679e+01 4.13648827e+01 4.14296604e+01
 4.14354813e+01 4.14141091e+01 4.13032382e+01 4.11670122e+01
 4.09696314e+01 4.07227506e+01 4.04605573e+01 4.02054485e+01
 3.99817215e+01 3.97368867e+01 3.94845278e+01 3.93300337e+01
 3.91623513e+01 3.89744323e+01 3.87945514e+01 3.86053703e+01
 3.84223491e+01 3.81732085e+01 3.79949548e+01 3.77732095e+01
 3.75671233e+01 3.75896605e+01 3.76692475e+01 3.78084502e+01
 3.78839387e+01 3.79331347e+01 3.79934235e+01 3.80487338e+01
 3.82051520e+01 3.84170786e+01 3.86990958e+01 3.90095029e+01
 3.93249824e+01 3.96197066e+01 3.99106706e+01 4.01637716e+01
 4.03768559e+01 4.06450754e+01 4.08933034e+01 4.11188150e+01
 4.13320669e+01 4.15535118e+01 4.17492081e+01 4.19386264e+01
 4.21097633e+01 4.22870450e+01 4.25009451e+01 4.27898931e+01
 4.29763804e+01 4.30902106e+01 4.32057130e+01 4.33579802e+01
 4.34883890e+01 4.36612927e+01 4.37781045e+01 4.38468251e+01
 4.38446181e+01 4.38503849e+01 4.38716500e+01 4.36763846e+01
 4.34418022e+01 4.32401836e+01 4.30394853e+01 4.28326961e+01
 4.26126051e+01 4.23157518e+01 4.20888864e+01 4.18571244e+01
 4.16079847e+01 4.13266104e+01 4.09730946e+01 4.05820792e+01
 4.01508888e+01 3.97712379e+01 3.93823849e+01 3.89936544e+01
 3.86085275e+01 3.82261567e+01 3.78903046e+01 3.76484845e+01
 3.74078511e+01 3.71603981e+01 3.69135261e+01 3.66746252e+01
 3.65375788e+01 3.64779098e+01 3.64839700e+01 3.64692693e+01
 3.64276168e+01 3.63783123e+01 3.63164715e+01 3.63188182e+01
 3.62758945e+01 3.62041382e+01 3.61324571e+01 3.60420357e+01
 3.59476397e+01 3.57792636e+01 3.56171229e+01 3.54516045e+01
 3.52650427e+01 3.50620625e+01 3.48397685e+01 3.45840927e+01
 3.43473710e+01 3.42065601e+01 3.41053930e+01 3.39906322e+01
 3.38261982e+01 3.36332763e+01 3.34124062e+01 3.31316692e+01
 3.28076186e+01 3.26402837e+01 3.24980507e+01 3.23223398e+01
 3.21007400e+01 3.18901280e+01 3.16930812e+01 3.15714059e+01
 3.15704874e+01 3.15783618e+01 3.15850869e+01 3.15710544e+01
 3.15257267e+01 3.14499841e+01 3.13859795e+01 3.11764959e+01
 3.09719114e+01 3.07794168e+01 3.05767578e+01 3.03827218e+01
 3.01993089e+01 2.99906132e+01 2.97929831e+01 2.94867609e+01
 2.91733873e+01 2.88880889e+01 2.86030649e+01 2.82919292e+01
 2.80605395e+01 2.78608041e+01 2.76251705e+01 2.73881694e+01
 2.71189427e+01 2.68250246e+01 2.65247468e+01 2.62143819e+01
 2.58813625e+01 2.57212195e+01 2.55432488e+01 2.53464433e+01
 2.51639815e+01 2.49807919e+01 2.47414046e+01 2.45862467e+01
 2.45017381e+01 2.43989902e+01 2.42845427e+01 2.41738117e+01
 2.40550876e+01 2.38474356e+01 2.37110272e+01 2.36987033e+01
 2.36654182e+01 2.36123577e+01 2.35452011e+01 2.34487768e+01
 2.33969941e+01 2.34314295e+01 2.34928870e+01 2.35335132e+01
 2.35670822e+01 2.35841189e+01 2.36038600e+01 2.35577304e+01
 2.34382804e+01 2.32530723e+01 2.30310891e+01 2.27908318e+01
 2.25641816e+01 2.23421369e+01 2.22073898e+01 2.20390351e+01
 2.18326802e+01 2.16299757e+01 2.14179745e+01 2.11864558e+01
 2.09298477e+01 2.07176660e+01 2.03319237e+01 1.99168497e+01
 1.95209124e+01 1.91061144e+01 1.86715493e+01 1.82082378e+01
 1.79198901e+01 1.75124897e+01 1.71249670e+01 1.67382249e+01
 1.63809560e+01 1.60723307e+01 1.57621881e+01 1.55492397e+01
 1.54489751e+01 1.52987447e+01 1.51338465e+01 1.49447925e+01
 1.47316846e+01 1.44785857e+01 1.41873451e+01 1.39803285e+01
 1.37807226e+01 1.35701110e+01 1.33529218e+01 1.31040204e+01
 1.28310429e+01 1.24746854e+01 1.21378254e+01 1.17921592e+01
 1.14972413e+01 1.12233841e+01 1.09534257e+01 1.06788726e+01
 1.03249088e+01 9.98976614e+00 9.65841598e+00 9.35715263e+00
 9.06600505e+00 8.76643378e+00 8.49478774e+00 8.24911310e+00
 8.04080409e+00 7.83185246e+00 7.63571280e+00 7.46880572e+00
 7.33500167e+00 7.23297314e+00 7.11790424e+00 7.00960104e+00
 6.89484165e+00 6.77668436e+00 6.69622155e+00 6.62002574e+00
 6.55342916e+00 6.43989653e+00 6.29538731e+00 6.14586742e+00
 5.97366456e+00 5.80575947e+00 5.66517182e+00 5.54749577e+00
 5.41867282e+00 5.27434353e+00 5.12209475e+00 4.93504464e+00
 4.74322229e+00 4.55147495e+00 4.34839272e+00 4.23583434e+00
 4.13155197e+00 4.02726741e+00 3.92527583e+00 3.81647032e+00
 3.70230476e+00 3.59443544e+00 3.61570828e+00 3.65837007e+00
 3.71143483e+00 3.76217344e+00 3.80249573e+00 3.83982028e+00]
SPM{F} inference field
   SPM.effect    :   Main A
   SPM.z         :  (1x1000) raw test stat field
   SPM.df        :  (1.784, 107.267)
   SPM.fwhm      :  97.37099
   SPM.resels    :  (1, 10.25973)
Inference:
   SPM.alpha     :  0.050
   SPM.zstar     :  7.03226
   SPM.h0reject  :  True
   SPM.p_set     :  <0.001
   SPM.p_cluster :  (<0.001, <0.001)
