# Supplementary material for: The Application of Statistical Parametric Mapping to Evaluate Differences in Topspin Backhand between Chinese and Polish Female Table Tennis Players
Source: Appl Bionics Biomech. 2021 Jul 14;2021:5555874. doi: 10.1155/2021/5555874 (PMC8339346; doi:10.1155/2021/5555874)
Supplement: Supplementary Materials — Angles and accelerations. [file 5555874.f1.zip › Hip LT-Flexion (deg) cykleSPM.txt]

[3.06112888e+01 2.99660214e+01 2.93074030e+01 2.86552612e+01
 2.80157021e+01 2.73985104e+01 2.67880547e+01 2.62446528e+01
 2.60013349e+01 2.57770684e+01 2.55544848e+01 2.53752089e+01
 2.52175166e+01 2.51032241e+01 2.51012300e+01 2.53302431e+01
 2.55562709e+01 2.57826275e+01 2.60654509e+01 2.63634424e+01
 2.66740847e+01 2.70083400e+01 2.71747175e+01 2.73657853e+01
 2.75921435e+01 2.78183546e+01 2.80497024e+01 2.82556875e+01
 2.84385994e+01 2.84184135e+01 2.83974031e+01 2.83674905e+01
 2.83466921e+01 2.83299855e+01 2.83210970e+01 2.82762769e+01
 2.80360865e+01 2.77617891e+01 2.74747845e+01 2.71702648e+01
 2.68599901e+01 2.65413600e+01 2.61495080e+01 2.56983228e+01
 2.52303551e+01 2.47722055e+01 2.43073373e+01 2.38494608e+01
 2.33983640e+01 2.30085642e+01 2.26861587e+01 2.23678011e+01
 2.20618170e+01 2.17627223e+01 2.14641200e+01 2.11504896e+01
 2.07803066e+01 2.04771587e+01 2.01676933e+01 1.98487910e+01
 1.95321409e+01 1.92193450e+01 1.89166337e+01 1.86412452e+01
 1.84326741e+01 1.82234279e+01 1.80210582e+01 1.78324621e+01
 1.76111943e+01 1.73836233e+01 1.71459609e+01 1.68676615e+01
 1.66152353e+01 1.64035888e+01 1.61903810e+01 1.59657161e+01
 1.56876780e+01 1.54495819e+01 1.53082806e+01 1.51762378e+01
 1.50464179e+01 1.49200955e+01 1.47674542e+01 1.46131400e+01
 1.45130513e+01 1.44130725e+01 1.42524749e+01 1.40583513e+01
 1.38475107e+01 1.36248763e+01 1.34022199e+01 1.32583123e+01
 1.31597209e+01 1.30577063e+01 1.29369661e+01 1.27784326e+01
 1.25976306e+01 1.23792901e+01 1.22404349e+01 1.21321511e+01
 1.19982408e+01 1.18338462e+01 1.16547918e+01 1.14694395e+01
 1.12995005e+01 1.10912147e+01 1.08897280e+01 1.06953417e+01
 1.04814293e+01 1.02680673e+01 1.00640391e+01 9.88466476e+00
 9.77497214e+00 9.71520536e+00 9.65468929e+00 9.59529293e+00
 9.55176871e+00 9.53548626e+00 9.53088636e+00 9.55791576e+00
 9.61277872e+00 9.69625486e+00 9.78554027e+00 9.88632787e+00
 1.00194529e+01 1.01964303e+01 1.03364505e+01 1.04990482e+01
 1.07119272e+01 1.09299106e+01 1.11738933e+01 1.14212092e+01
 1.16535473e+01 1.17821619e+01 1.19549752e+01 1.21453706e+01
 1.23370585e+01 1.25355184e+01 1.27747160e+01 1.30829743e+01
 1.33989148e+01 1.36771362e+01 1.39478512e+01 1.42196553e+01
 1.45375597e+01 1.48595470e+01 1.51274646e+01 1.53768025e+01
 1.56196366e+01 1.58753958e+01 1.61442170e+01 1.64007638e+01
 1.66272748e+01 1.68201539e+01 1.70254917e+01 1.72509141e+01
 1.74540298e+01 1.76459065e+01 1.78356771e+01 1.80278243e+01
 1.81835330e+01 1.82613030e+01 1.82189602e+01 1.81777177e+01
 1.81330711e+01 1.80690011e+01 1.80003172e+01 1.79134125e+01
 1.78347627e+01 1.77325597e+01 1.76219380e+01 1.75031260e+01
 1.73860624e+01 1.72528341e+01 1.71098597e+01 1.69847116e+01
 1.68254472e+01 1.66608878e+01 1.64861774e+01 1.63132736e+01
 1.61342070e+01 1.59527824e+01 1.57707738e+01 1.55028013e+01
 1.52191698e+01 1.49008338e+01 1.45613386e+01 1.42442887e+01
 1.39154603e+01 1.35764224e+01 1.32234768e+01 1.28576198e+01
 1.24998923e+01 1.21412026e+01 1.17641200e+01 1.14159015e+01
 1.10951009e+01 1.08107845e+01 1.05252365e+01 1.02428201e+01
 9.96694822e+00 9.69504143e+00 9.47884599e+00 9.31921366e+00
 9.19943022e+00 9.10044597e+00 9.00242274e+00 8.91582120e+00
 8.83676899e+00 8.78097841e+00 8.74560851e+00 8.71314591e+00
 8.69960894e+00 8.69747255e+00 8.69710826e+00 8.71115198e+00
 8.74437310e+00 8.78342371e+00 8.85199149e+00 8.92498329e+00
 8.99811154e+00 9.08265536e+00 9.17195493e+00 9.24858482e+00
 9.33138733e+00 9.45997550e+00 9.58172114e+00 9.71910272e+00
 9.86507499e+00 1.00129527e+01 1.01587687e+01 1.02918854e+01
 1.04162454e+01 1.05315310e+01 1.06391545e+01 1.07360235e+01
 1.08219395e+01 1.09104592e+01 1.09905135e+01 1.10786322e+01
 1.11640805e+01 1.12417592e+01 1.13132195e+01 1.13703446e+01
 1.14069500e+01 1.14406627e+01 1.14641394e+01 1.14895001e+01
 1.15178710e+01 1.15350798e+01 1.15402671e+01 1.15604413e+01
 1.15715319e+01 1.15705386e+01 1.15622976e+01 1.15513054e+01
 1.15231071e+01 1.14936456e+01 1.14942627e+01 1.15071834e+01
 1.15288686e+01 1.15538903e+01 1.15733429e+01 1.16098700e+01
 1.16257376e+01 1.16337794e+01 1.16351920e+01 1.16445244e+01
 1.16510544e+01 1.16635471e+01 1.16605580e+01 1.16637820e+01
 1.16786012e+01 1.16994539e+01 1.17293143e+01 1.17570705e+01
 1.17950020e+01 1.18583270e+01 1.19281206e+01 1.20197295e+01
 1.21124343e+01 1.22183361e+01 1.23371304e+01 1.24659264e+01
 1.26321220e+01 1.28043048e+01 1.29853761e+01 1.31763200e+01
 1.34004359e+01 1.36187487e+01 1.38608312e+01 1.41462302e+01
 1.44275328e+01 1.46901365e+01 1.49579974e+01 1.52616980e+01
 1.55629478e+01 1.58797330e+01 1.62285885e+01 1.65769263e+01
 1.69244634e+01 1.72848438e+01 1.76832538e+01 1.80790813e+01
 1.84722118e+01 1.88587463e+01 1.92714500e+01 1.97042971e+01
 2.01375133e+01 2.05603901e+01 2.09763981e+01 2.13777887e+01
 2.18009750e+01 2.22627059e+01 2.27629030e+01 2.33014768e+01
 2.39240296e+01 2.45529650e+01 2.51782483e+01 2.57945335e+01
 2.64370919e+01 2.71110694e+01 2.78281939e+01 2.86039303e+01
 2.93748053e+01 3.02195095e+01 3.10649005e+01 3.18841462e+01
 3.27040043e+01 3.35204979e+01 3.43793358e+01 3.52345082e+01
 3.60258861e+01 3.68071377e+01 3.76169743e+01 3.84562573e+01
 3.92871922e+01 4.01024302e+01 4.09202692e+01 4.15796631e+01
 4.22352005e+01 4.29315518e+01 4.36137302e+01 4.42380776e+01
 4.47648303e+01 4.52452122e+01 4.55581386e+01 4.59161914e+01
 4.62643906e+01 4.65948158e+01 4.69740700e+01 4.74621529e+01
 4.79481780e+01 4.84484917e+01 4.89058109e+01 4.93456704e+01
 4.97718161e+01 5.01427828e+01 5.04222386e+01 5.07037650e+01
 5.10267302e+01 5.13730924e+01 5.16004456e+01 5.17930109e+01
 5.18497233e+01 5.16712150e+01 5.14711309e+01 5.12191195e+01
 5.09652092e+01 5.06496237e+01 5.03238630e+01 4.99836357e+01
 4.95851730e+01 4.91561079e+01 4.86790906e+01 4.81503232e+01
 4.75983383e+01 4.70430977e+01 4.65160138e+01 4.60261929e+01
 4.55505700e+01 4.51351118e+01 4.47562062e+01 4.43389853e+01
 4.39320760e+01 4.35213907e+01 4.31058365e+01 4.27654646e+01
 4.24625867e+01 4.21693003e+01 4.17974809e+01 4.14410024e+01
 4.11002651e+01 4.07877852e+01 4.05421221e+01 4.03318072e+01
 4.00924973e+01 3.98359320e+01 3.95418188e+01 3.92112332e+01
 3.88504160e+01 3.85136007e+01 3.81589878e+01 3.78111598e+01
 3.74306008e+01 3.70547327e+01 3.66913279e+01 3.63269396e+01
 3.60275507e+01 3.57297202e+01 3.54352284e+01 3.51218395e+01
 3.48006251e+01 3.44275933e+01 3.40094591e+01 3.36383585e+01
 3.32887217e+01 3.29169539e+01 3.25077011e+01 3.20922716e+01
 3.16356693e+01 3.11379144e+01 3.06522177e+01 3.02523482e+01
 2.98615069e+01 2.94536276e+01 2.90600119e+01 2.86856754e+01
 2.83374590e+01 2.80321842e+01 2.77592058e+01 2.75112967e+01
 2.72889274e+01 2.70554355e+01 2.68688621e+01 2.66892824e+01
 2.64868089e+01 2.62950162e+01 2.60637314e+01 2.57740974e+01
 2.54602048e+01 2.51507673e+01 2.48787191e+01 2.46045134e+01
 2.42555530e+01 2.39028167e+01 2.35717633e+01 2.32544225e+01
 2.29520080e+01 2.26227098e+01 2.22970466e+01 2.19408948e+01
 2.15738449e+01 2.12074617e+01 2.08319596e+01 2.03919070e+01
 1.99104082e+01 1.94579665e+01 1.90744305e+01 1.87238511e+01
 1.84003659e+01 1.80875157e+01 1.77846932e+01 1.74935186e+01
 1.72117956e+01 1.69502314e+01 1.66952659e+01 1.64319089e+01
 1.61785845e+01 1.59414834e+01 1.57000423e+01 1.54869987e+01
 1.52903797e+01 1.51282210e+01 1.49759488e+01 1.48250265e+01
 1.46919568e+01 1.45674548e+01 1.44370398e+01 1.43016126e+01
 1.41718635e+01 1.40452048e+01 1.39167165e+01 1.37548476e+01
 1.35462440e+01 1.33384244e+01 1.31505039e+01 1.29853677e+01
 1.28253054e+01 1.26602825e+01 1.24981981e+01 1.23506302e+01
 1.21990774e+01 1.20564181e+01 1.19746406e+01 1.19104858e+01
 1.18414897e+01 1.17749827e+01 1.16995000e+01 1.16082463e+01
 1.15269996e+01 1.14955131e+01 1.14527578e+01 1.14071662e+01
 1.13898038e+01 1.13853294e+01 1.13631527e+01 1.13184176e+01
 1.12689053e+01 1.12157153e+01 1.11560127e+01 1.11240421e+01
 1.11106700e+01 1.10623485e+01 1.10137627e+01 1.09950361e+01
 1.09678311e+01 1.09331548e+01 1.09060864e+01 1.08757668e+01
 1.08404232e+01 1.08050269e+01 1.08061837e+01 1.08101740e+01
 1.08146067e+01 1.08901832e+01 1.09967077e+01 1.11027349e+01
 1.12074193e+01 1.13230211e+01 1.14467585e+01 1.15955600e+01
 1.17112910e+01 1.18549942e+01 1.20020881e+01 1.21499080e+01
 1.22967423e+01 1.24387374e+01 1.25830927e+01 1.27618423e+01
 1.29597518e+01 1.31689424e+01 1.33829665e+01 1.36141776e+01
 1.38445338e+01 1.40798320e+01 1.43967484e+01 1.47674176e+01
 1.51207559e+01 1.54500402e+01 1.58082821e+01 1.61646000e+01
 1.65176900e+01 1.68587022e+01 1.72197885e+01 1.76186103e+01
 1.80509726e+01 1.85185158e+01 1.89920574e+01 1.94819131e+01
 1.99859588e+01 2.04941368e+01 2.10154394e+01 2.15495829e+01
 2.20850276e+01 2.26242215e+01 2.31306299e+01 2.35665276e+01
 2.39874485e+01 2.43981115e+01 2.47759289e+01 2.51290613e+01
 2.54493591e+01 2.57020231e+01 2.58942958e+01 2.60560026e+01
 2.62183810e+01 2.62352508e+01 2.61515880e+01 2.60606638e+01
 2.59262519e+01 2.57468346e+01 2.55411835e+01 2.53309430e+01
 2.51563425e+01 2.49908173e+01 2.48294356e+01 2.46866491e+01
 2.45400243e+01 2.43924037e+01 2.42415640e+01 2.41581209e+01
 2.40965826e+01 2.40263626e+01 2.39161456e+01 2.37325877e+01
 2.35293883e+01 2.33285485e+01 2.30452718e+01 2.27359029e+01
 2.24154080e+01 2.20774831e+01 2.17535491e+01 2.14020367e+01
 2.10442855e+01 2.05499505e+01 2.00311973e+01 1.95273052e+01
 1.89707204e+01 1.83725092e+01 1.77656805e+01 1.71673192e+01
 1.65643855e+01 1.59552882e+01 1.53735742e+01 1.47992481e+01
 1.42166250e+01 1.36422018e+01 1.30832011e+01 1.25393767e+01
 1.20225953e+01 1.15083430e+01 1.09973201e+01 1.05023209e+01
 1.00206756e+01 9.55431955e+00 9.14428033e+00 8.73896954e+00
 8.33831961e+00 7.94773564e+00 7.58667670e+00 7.24441032e+00
 6.91677911e+00 6.56225323e+00 6.21485927e+00 5.88438265e+00
 5.57156012e+00 5.26718174e+00 4.98647255e+00 4.71313278e+00
 4.44273594e+00 4.17716855e+00 3.92122444e+00 3.67215295e+00
 3.42985365e+00 3.19364530e+00 2.96626885e+00 2.73901863e+00
 2.51619499e+00 2.30432066e+00 2.10323583e+00 1.90818330e+00
 1.71990374e+00 1.54191083e+00 1.38033667e+00 1.22147574e+00
 1.07173009e+00 9.31279526e-01 8.03566895e-01 6.87965126e-01
 5.81401405e-01 4.85175732e-01 3.99000929e-01 3.20414191e-01
 2.50766103e-01 1.87004606e-01 1.32310041e-01 8.76605759e-02
 5.34966554e-02 2.75317624e-02 1.06758902e-02 1.76565783e-03
 3.03325875e-04 5.59630680e-03 1.72837820e-02 3.53526376e-02
 5.88682326e-02 8.76591725e-02 1.22659227e-01 1.59378577e-01
 1.97873618e-01 2.40315807e-01 2.87358329e-01 3.39579375e-01
 3.92337184e-01 4.52491414e-01 5.19761507e-01 5.90789343e-01
 6.65479839e-01 7.44283841e-01 8.28985038e-01 9.17690719e-01
 1.01222947e+00 1.10766168e+00 1.20695913e+00 1.30146307e+00
 1.39059938e+00 1.47881835e+00 1.56968761e+00 1.66455068e+00
 1.75702985e+00 1.85084436e+00 1.95669459e+00 2.06430968e+00
 2.16921471e+00 2.27356907e+00 2.38194011e+00 2.49413373e+00
 2.60577895e+00 2.70194688e+00 2.79065641e+00 2.87889623e+00
 2.96552888e+00 3.05596018e+00 3.14877424e+00 3.24212761e+00
 3.32963439e+00 3.41150525e+00 3.51369020e+00 3.62534110e+00
 3.73896514e+00 3.83942902e+00 3.93282244e+00 4.01627287e+00
 4.09400666e+00 4.17819891e+00 4.26574233e+00 4.35122999e+00
 4.44288079e+00 4.53000005e+00 4.60775732e+00 4.68487168e+00
 4.75668465e+00 4.82630064e+00 4.89910092e+00 4.97353766e+00
 5.04441719e+00 5.08759067e+00 5.12419317e+00 5.15365059e+00
 5.18195713e+00 5.21017676e+00 5.22657374e+00 5.24215738e+00
 5.24561063e+00 5.24733709e+00 5.26888267e+00 5.27814195e+00
 5.27809514e+00 5.24504575e+00 5.19719237e+00 5.15951552e+00
 5.12311094e+00 5.08887168e+00 5.06153987e+00 5.03433830e+00
 5.01682821e+00 4.99299370e+00 4.96255247e+00 4.92735980e+00
 4.88133653e+00 4.83656005e+00 4.79393767e+00 4.75571172e+00
 4.70904032e+00 4.65826318e+00 4.59870589e+00 4.52485005e+00
 4.45230001e+00 4.39073575e+00 4.31462975e+00 4.23333431e+00
 4.13692953e+00 4.04480971e+00 3.96256851e+00 3.88164701e+00
 3.79781705e+00 3.73359667e+00 3.67247169e+00 3.60100557e+00
 3.52816291e+00 3.45254877e+00 3.37752717e+00 3.30106169e+00
 3.21454070e+00 3.13693854e+00 3.08260971e+00 3.00296449e+00
 2.91504761e+00 2.82590905e+00 2.72862460e+00 2.61804243e+00
 2.50265398e+00 2.38765622e+00 2.28022391e+00 2.17265670e+00
 2.06492443e+00 1.95581308e+00 1.84926082e+00 1.73877634e+00
 1.61695010e+00 1.50959258e+00 1.40482092e+00 1.30135690e+00
 1.20276964e+00 1.10595076e+00 1.00763433e+00 9.05773954e-01
 8.04937569e-01 7.08142563e-01 6.15249305e-01 5.27382492e-01
 4.58789957e-01 4.01731528e-01 3.51825597e-01 3.06143593e-01
 2.61904097e-01 2.19018928e-01 1.77801020e-01 1.39924395e-01
 1.08713477e-01 8.26530538e-02 6.03694292e-02 4.17875281e-02
 2.62577295e-02 1.36733706e-02 4.67739393e-03 2.10791808e-04
 1.86619235e-03 1.06512197e-02 2.70563906e-02 5.22105069e-02
 8.71157558e-02 1.32057211e-01 1.90844988e-01 2.65463139e-01
 3.55369796e-01 4.59496188e-01 5.81098452e-01 7.19805574e-01
 8.66173409e-01 1.02256007e+00 1.19562330e+00 1.38563736e+00
 1.59356781e+00 1.82327029e+00 2.07749340e+00 2.34244861e+00
 2.60758213e+00 2.86959736e+00 3.14051337e+00 3.42884197e+00
 3.74055315e+00 4.08012579e+00 4.46611960e+00 4.86509157e+00
 5.26814292e+00 5.68864698e+00 6.12788966e+00 6.58520659e+00
 7.07891549e+00 7.65131106e+00 8.23709614e+00 8.86031945e+00
 9.51473644e+00 1.01975388e+01 1.09301370e+01 1.17044861e+01
 1.24499518e+01 1.32776965e+01 1.41558946e+01 1.50723353e+01
 1.60345960e+01 1.70577142e+01 1.81260367e+01 1.91661974e+01
 2.01637750e+01 2.11640157e+01 2.22090447e+01 2.32774974e+01
 2.44122830e+01 2.55716214e+01 2.66973038e+01 2.77915105e+01
 2.89204344e+01 3.00969166e+01 3.12848977e+01 3.25031864e+01
 3.37235016e+01 3.49248711e+01 3.60950575e+01 3.73801624e+01
 3.86818845e+01 4.00335042e+01 4.13738812e+01 4.27707726e+01
 4.42188504e+01 4.57790216e+01 4.73825829e+01 4.90802846e+01
 5.08483832e+01 5.25837106e+01 5.43481336e+01 5.60563233e+01
 5.78699300e+01 5.96755999e+01 6.15020268e+01 6.33592603e+01
 6.53326821e+01 6.73664109e+01 6.92694603e+01 7.09466331e+01
 7.26130507e+01 7.42532496e+01 7.58661195e+01 7.73935666e+01
 7.88301434e+01 8.01734289e+01 8.14649489e+01 8.27738154e+01
 8.40844695e+01 8.53609653e+01 8.65745024e+01 8.76834093e+01
 8.88052374e+01 9.01413257e+01 9.15308125e+01 9.29123643e+01
 9.42606213e+01 9.56356751e+01 9.69270960e+01 9.79119222e+01
 9.85996960e+01 9.91242825e+01 9.95832127e+01 9.99233090e+01
 1.00114291e+02 1.00257618e+02 1.00306249e+02 1.00168373e+02
 1.00007198e+02 9.97703214e+01 9.94136471e+01 9.89558285e+01
 9.83864423e+01 9.77129263e+01 9.69014732e+01 9.60411598e+01
 9.51529562e+01 9.41191738e+01 9.29578727e+01 9.16861467e+01
 9.03539215e+01 8.88962041e+01 8.74425129e+01 8.59421794e+01
 8.43243564e+01 8.25604915e+01 8.06667512e+01 7.91844333e+01
 7.77920208e+01 7.63916069e+01 7.49929577e+01 7.35887544e+01
 7.21441412e+01 7.06709646e+01 6.93916105e+01 6.81696800e+01
 6.68995440e+01 6.56159153e+01 6.43378411e+01 6.30035355e+01
 6.16541880e+01 6.07439737e+01 5.99397562e+01 5.90936590e+01
 5.81418490e+01 5.71183301e+01 5.60569234e+01 5.49943133e+01
 5.41808337e+01 5.33967872e+01 5.25746357e+01 5.17806599e+01
 5.09275396e+01 5.00580181e+01 4.91413364e+01 4.84271127e+01
 4.76853527e+01 4.69320954e+01 4.61603366e+01 4.53373644e+01
 4.44948018e+01 4.36379641e+01 4.27428241e+01 4.17584353e+01
 4.07590061e+01 3.97509917e+01 3.87368245e+01 3.77354232e+01]
SPM{F} inference field
   SPM.effect    :   Main A
   SPM.z         :  (1x1000) raw test stat field
   SPM.df        :  (1.906, 116.096)
   SPM.fwhm      :  147.79839
   SPM.resels    :  (1, 6.75921)
Inference:
   SPM.alpha     :  0.050
   SPM.zstar     :  6.24114
   SPM.h0reject  :  True
   SPM.p_set     :  <0.001
   SPM.p_cluster :  (<0.001, 0.001)
