# Supplementary material for: The Application of Statistical Parametric Mapping to Evaluate Differences in Topspin Backhand between Chinese and Polish Female Table Tennis Players
Source: Appl Bionics Biomech. 2021 Jul 14;2021:5555874. doi: 10.1155/2021/5555874 (PMC8339346; doi:10.1155/2021/5555874)
Supplement: Supplementary Materials — Angles and accelerations. [file 5555874.f1.zip › Hip LT-Rotation Ext (deg) cykleSPM.txt]

[1.58956906e+01 1.60043845e+01 1.60991493e+01 1.61907782e+01
 1.62740664e+01 1.63768730e+01 1.64664830e+01 1.65444293e+01
 1.67516591e+01 1.69510610e+01 1.71601565e+01 1.73684875e+01
 1.75799201e+01 1.78032149e+01 1.80532546e+01 1.83965711e+01
 1.87461854e+01 1.90947487e+01 1.94518582e+01 1.98104351e+01
 2.01567522e+01 2.04981899e+01 2.08318712e+01 2.11721215e+01
 2.15168931e+01 2.18792542e+01 2.22513422e+01 2.25914602e+01
 2.28944288e+01 2.30998752e+01 2.33138271e+01 2.35166365e+01
 2.36856994e+01 2.38631814e+01 2.40407928e+01 2.41288256e+01
 2.41551483e+01 2.41769465e+01 2.42012328e+01 2.42229553e+01
 2.42238801e+01 2.41810864e+01 2.40910785e+01 2.39618309e+01
 2.38269438e+01 2.36986741e+01 2.35510488e+01 2.33838059e+01
 2.31799866e+01 2.29155502e+01 2.26833651e+01 2.24343625e+01
 2.21551799e+01 2.18685628e+01 2.15697263e+01 2.12883060e+01
 2.09649271e+01 2.06001314e+01 2.02255886e+01 1.98542972e+01
 1.94775300e+01 1.91004183e+01 1.87981561e+01 1.84331838e+01
 1.81050156e+01 1.78006575e+01 1.74949656e+01 1.72004630e+01
 1.69262739e+01 1.67505898e+01 1.65141872e+01 1.61979569e+01
 1.58919083e+01 1.56518058e+01 1.54704929e+01 1.53168268e+01
 1.51920141e+01 1.51315074e+01 1.51189109e+01 1.50970129e+01
 1.51167775e+01 1.51555780e+01 1.52213240e+01 1.53678512e+01
 1.56061167e+01 1.57972829e+01 1.59612818e+01 1.60807936e+01
 1.61826619e+01 1.63013633e+01 1.64610428e+01 1.66465418e+01
 1.69024765e+01 1.71966758e+01 1.74960330e+01 1.77701552e+01
 1.80611730e+01 1.84157390e+01 1.88251057e+01 1.92589787e+01
 1.96718364e+01 2.00533603e+01 2.04107482e+01 2.07602110e+01
 2.10594460e+01 2.13008422e+01 2.16337752e+01 2.19426729e+01
 2.22089769e+01 2.24249324e+01 2.26060186e+01 2.26183332e+01
 2.27059739e+01 2.27362252e+01 2.27373403e+01 2.27119470e+01
 2.26549901e+01 2.26174074e+01 2.25877945e+01 2.26507807e+01
 2.26186735e+01 2.25835944e+01 2.25670598e+01 2.25393814e+01
 2.25430964e+01 2.27184835e+01 2.28727358e+01 2.31290955e+01
 2.33785021e+01 2.35927990e+01 2.37645712e+01 2.38740850e+01
 2.39894326e+01 2.39363568e+01 2.39598408e+01 2.39377706e+01
 2.39009026e+01 2.38274688e+01 2.38313934e+01 2.40911838e+01
 2.43441088e+01 2.45767598e+01 2.47326507e+01 2.48712584e+01
 2.50291689e+01 2.51434733e+01 2.53700383e+01 2.55524267e+01
 2.57760870e+01 2.59864302e+01 2.61091943e+01 2.61854616e+01
 2.61698664e+01 2.61068193e+01 2.61666230e+01 2.62025296e+01
 2.61461650e+01 2.61249696e+01 2.60970361e+01 2.60852823e+01
 2.61397266e+01 2.62524562e+01 2.61780752e+01 2.60844599e+01
 2.59693501e+01 2.58290972e+01 2.56175254e+01 2.53519608e+01
 2.51082065e+01 2.48393951e+01 2.45324172e+01 2.42272381e+01
 2.39366700e+01 2.36466884e+01 2.32867330e+01 2.28651529e+01
 2.25976539e+01 2.23135600e+01 2.20379508e+01 2.17533928e+01
 2.15427171e+01 2.12926481e+01 2.09812187e+01 2.06670542e+01
 2.03532394e+01 2.00463799e+01 1.97080981e+01 1.94069797e+01
 1.90577438e+01 1.86785917e+01 1.83042985e+01 1.79179910e+01
 1.75281757e+01 1.71251558e+01 1.67851587e+01 1.64903985e+01
 1.62271582e+01 1.59748385e+01 1.57465253e+01 1.54832626e+01
 1.52075898e+01 1.49719565e+01 1.47761593e+01 1.46112149e+01
 1.45143400e+01 1.44277660e+01 1.43124540e+01 1.41901143e+01
 1.40976496e+01 1.39958407e+01 1.38913869e+01 1.38093371e+01
 1.37469842e+01 1.36997571e+01 1.36519116e+01 1.36517896e+01
 1.36834741e+01 1.37248288e+01 1.38107151e+01 1.38849054e+01
 1.39730216e+01 1.40495190e+01 1.41051211e+01 1.41869677e+01
 1.42758866e+01 1.43591681e+01 1.44239781e+01 1.45309486e+01
 1.46581946e+01 1.47909041e+01 1.49370225e+01 1.50375179e+01
 1.51172314e+01 1.52068726e+01 1.52629072e+01 1.52410173e+01
 1.51589992e+01 1.50434354e+01 1.49209758e+01 1.48611115e+01
 1.47995202e+01 1.47331805e+01 1.46268227e+01 1.45022783e+01
 1.43837424e+01 1.42650997e+01 1.41927184e+01 1.41252265e+01
 1.40506239e+01 1.39467991e+01 1.38262328e+01 1.36552533e+01
 1.34960491e+01 1.33044910e+01 1.31161132e+01 1.29186134e+01
 1.27182799e+01 1.25075502e+01 1.23291198e+01 1.21758490e+01
 1.20644172e+01 1.19510799e+01 1.18433443e+01 1.17617538e+01
 1.16890938e+01 1.16506815e+01 1.16008845e+01 1.15622842e+01
 1.15195942e+01 1.14791328e+01 1.14851425e+01 1.15007411e+01
 1.15768233e+01 1.16594854e+01 1.17139327e+01 1.17710610e+01
 1.18223238e+01 1.18954761e+01 1.19685600e+01 1.20598600e+01
 1.21563734e+01 1.22824940e+01 1.23909727e+01 1.25024579e+01
 1.26347159e+01 1.27628826e+01 1.28683939e+01 1.29691389e+01
 1.30716075e+01 1.31716419e+01 1.32743905e+01 1.33819539e+01
 1.34582717e+01 1.34724860e+01 1.35104668e+01 1.35534810e+01
 1.35929022e+01 1.36421265e+01 1.36989907e+01 1.37321127e+01
 1.36956664e+01 1.36678045e+01 1.36496980e+01 1.36382846e+01
 1.36396058e+01 1.36653295e+01 1.37045332e+01 1.37574604e+01
 1.38103268e+01 1.38442581e+01 1.38725631e+01 1.38856396e+01
 1.38968922e+01 1.40190743e+01 1.42538377e+01 1.44924269e+01
 1.47332795e+01 1.49696145e+01 1.52121210e+01 1.54513046e+01
 1.57044499e+01 1.59715379e+01 1.62545407e+01 1.65746030e+01
 1.68930532e+01 1.72403024e+01 1.76148621e+01 1.80920052e+01
 1.86673535e+01 1.92900211e+01 1.99750044e+01 2.06599177e+01
 2.13633650e+01 2.20496243e+01 2.28566062e+01 2.37075364e+01
 2.45677336e+01 2.54550989e+01 2.63604857e+01 2.72659505e+01
 2.81158244e+01 2.89978683e+01 2.99056854e+01 3.08430925e+01
 3.18057713e+01 3.27560222e+01 3.35987332e+01 3.44153174e+01
 3.51982323e+01 3.59352608e+01 3.66367694e+01 3.73136732e+01
 3.79664970e+01 3.85958693e+01 3.92060599e+01 3.97780201e+01
 4.03233861e+01 4.08218470e+01 4.12359683e+01 4.17677936e+01
 4.23524347e+01 4.29495881e+01 4.34427654e+01 4.39062533e+01
 4.43896850e+01 4.48707946e+01 4.52907657e+01 4.56280097e+01
 4.58698705e+01 4.62444157e+01 4.66080333e+01 4.70078312e+01
 4.74265944e+01 4.78046057e+01 4.81465062e+01 4.84409179e+01
 4.88433222e+01 4.92356389e+01 4.95951299e+01 4.99093997e+01
 5.01906239e+01 5.04314602e+01 5.06825791e+01 5.08865000e+01
 5.10356175e+01 5.11086056e+01 5.10930343e+01 5.10534422e+01
 5.09357547e+01 5.07202183e+01 5.05791474e+01 5.04085324e+01
 5.01956169e+01 4.99473797e+01 4.95935123e+01 4.91646079e+01
 4.87120016e+01 4.83343007e+01 4.78875715e+01 4.74020955e+01
 4.68737896e+01 4.63838149e+01 4.58897426e+01 4.54390295e+01
 4.49376923e+01 4.44283153e+01 4.39863249e+01 4.36442457e+01
 4.33477695e+01 4.29686862e+01 4.26127917e+01 4.22396356e+01
 4.18379501e+01 4.13906454e+01 4.09729854e+01 4.06704281e+01
 4.04022399e+01 4.00688804e+01 3.96432413e+01 3.91785504e+01
 3.86812963e+01 3.82084021e+01 3.78155348e+01 3.75545107e+01
 3.73110922e+01 3.70594702e+01 3.68177004e+01 3.65920497e+01
 3.64041802e+01 3.62939489e+01 3.62668768e+01 3.61932701e+01
 3.60751134e+01 3.59510241e+01 3.58796475e+01 3.57905653e+01
 3.56991806e+01 3.56803923e+01 3.56294429e+01 3.55507226e+01
 3.54572331e+01 3.53332078e+01 3.51096319e+01 3.48259097e+01
 3.44687847e+01 3.41554913e+01 3.38903260e+01 3.36378686e+01
 3.33381827e+01 3.30055121e+01 3.26518252e+01 3.23030632e+01
 3.19818353e+01 3.16405741e+01 3.12455347e+01 3.08355548e+01
 3.03745925e+01 2.98910054e+01 2.94306824e+01 2.90550516e+01
 2.87180086e+01 2.83887545e+01 2.80555935e+01 2.77090411e+01
 2.73371631e+01 2.69287676e+01 2.65870333e+01 2.62572054e+01
 2.59164746e+01 2.55829403e+01 2.52274984e+01 2.48710014e+01
 2.44971066e+01 2.42115506e+01 2.39303923e+01 2.36324883e+01
 2.33811498e+01 2.32518663e+01 2.31428142e+01 2.29952182e+01
 2.28462353e+01 2.26847369e+01 2.24991735e+01 2.23321022e+01
 2.22007738e+01 2.20567220e+01 2.19012659e+01 2.17751153e+01
 2.16393919e+01 2.15132005e+01 2.13966291e+01 2.13001461e+01
 2.11948962e+01 2.10924377e+01 2.09547542e+01 2.08337822e+01
 2.07172290e+01 2.05926713e+01 2.04338869e+01 2.02727268e+01
 2.00994158e+01 1.99305447e+01 1.97452877e+01 1.95603191e+01
 1.93453705e+01 1.90977396e+01 1.88350576e+01 1.85492222e+01
 1.82752032e+01 1.79973895e+01 1.77194438e+01 1.74557905e+01
 1.72348426e+01 1.70326122e+01 1.68290748e+01 1.66491247e+01
 1.64616428e+01 1.62643284e+01 1.62087962e+01 1.62368499e+01
 1.62544817e+01 1.62939918e+01 1.64139331e+01 1.65427645e+01
 1.66723304e+01 1.69759816e+01 1.73431374e+01 1.77094114e+01
 1.80912654e+01 1.85232477e+01 1.89682038e+01 1.94354881e+01
 2.00692462e+01 2.07501875e+01 2.14583231e+01 2.21814580e+01
 2.29180778e+01 2.36615581e+01 2.44199033e+01 2.52919992e+01
 2.61958298e+01 2.71231031e+01 2.80041448e+01 2.87954834e+01
 2.95346607e+01 3.02446108e+01 3.10258305e+01 3.18333794e+01
 3.26297500e+01 3.34077633e+01 3.41348008e+01 3.48450648e+01
 3.55361417e+01 3.62270717e+01 3.68900947e+01 3.75397745e+01
 3.83004283e+01 3.92037486e+01 4.00746835e+01 4.09235071e+01
 4.17814056e+01 4.25957468e+01 4.33668959e+01 4.41900237e+01
 4.50429886e+01 4.58871800e+01 4.66877880e+01 4.73899635e+01
 4.80623611e+01 4.86867840e+01 4.93777483e+01 5.01122385e+01
 5.08316278e+01 5.14687920e+01 5.20878513e+01 5.26906999e+01
 5.32364921e+01 5.37884133e+01 5.43139997e+01 5.47800901e+01
 5.51593621e+01 5.54518104e+01 5.56696026e+01 5.58377368e+01
 5.63773586e+01 5.70376628e+01 5.76490858e+01 5.82404086e+01
 5.87437057e+01 5.91752552e+01 5.95562618e+01 6.00752891e+01
 6.06028101e+01 6.10210297e+01 6.14450159e+01 6.17857076e+01
 6.20463744e+01 6.22375857e+01 6.23065366e+01 6.22875753e+01
 6.21775130e+01 6.21867870e+01 6.22576849e+01 6.23103638e+01
 6.23338488e+01 6.20955275e+01 6.17989798e+01 6.14834451e+01
 6.12846017e+01 6.11506189e+01 6.10438384e+01 6.09438617e+01
 6.07702917e+01 6.05691030e+01 6.04330434e+01 6.02971077e+01
 6.01767239e+01 6.00421313e+01 5.98776119e+01 5.97177208e+01
 5.96367187e+01 5.94917761e+01 5.92425464e+01 5.89535401e+01
 5.86343779e+01 5.82864148e+01 5.79170153e+01 5.75280701e+01
 5.70369042e+01 5.64260608e+01 5.57744825e+01 5.50864445e+01
 5.43375527e+01 5.35114158e+01 5.26684219e+01 5.17710541e+01
 5.08174331e+01 4.97943058e+01 4.87009877e+01 4.76139997e+01
 4.66357329e+01 4.56593739e+01 4.46816687e+01 4.36827789e+01
 4.26925212e+01 4.17115972e+01 4.07542801e+01 3.98806848e+01
 3.89948709e+01 3.81623685e+01 3.73144923e+01 3.64952654e+01
 3.56898350e+01 3.48941594e+01 3.41362822e+01 3.33461014e+01
 3.26606502e+01 3.19979610e+01 3.14157734e+01 3.08701146e+01
 3.03266023e+01 2.98197743e+01 2.93056196e+01 2.88993882e+01
 2.84870698e+01 2.81193692e+01 2.77738575e+01 2.73893180e+01
 2.69531575e+01 2.65156421e+01 2.61820102e+01 2.58280602e+01
 2.55652169e+01 2.53769621e+01 2.51690658e+01 2.48810144e+01
 2.45535103e+01 2.41795326e+01 2.37790780e+01 2.33965401e+01
 2.30369417e+01 2.26676096e+01 2.22803218e+01 2.18782106e+01
 2.14661973e+01 2.10403447e+01 2.05843197e+01 2.00998994e+01
 1.96692534e+01 1.92891750e+01 1.88770129e+01 1.84371038e+01
 1.79820042e+01 1.75110983e+01 1.70292518e+01 1.65942010e+01
 1.61945127e+01 1.57591640e+01 1.52818523e+01 1.47947130e+01
 1.42550254e+01 1.37075268e+01 1.32027432e+01 1.26958799e+01
 1.21900134e+01 1.16936535e+01 1.11948878e+01 1.07033141e+01
 1.02170783e+01 9.76729558e+00 9.31749671e+00 8.86172765e+00
 8.39713944e+00 7.92602194e+00 7.43860685e+00 7.00090963e+00
 6.60926443e+00 6.23450368e+00 5.86848053e+00 5.50715205e+00
 5.15068265e+00 4.87504523e+00 4.63414782e+00 4.38011455e+00
 4.12117631e+00 3.88472755e+00 3.65617265e+00 3.42507199e+00
 3.19434504e+00 2.97306267e+00 2.74851595e+00 2.52345211e+00
 2.30975646e+00 2.12597601e+00 1.95034722e+00 1.76609751e+00
 1.58941634e+00 1.43393119e+00 1.28756702e+00 1.16485654e+00
 1.05052956e+00 9.41835480e-01 8.41390688e-01 7.44135442e-01
 6.64506337e-01 5.86507674e-01 5.05374411e-01 4.32987994e-01
 3.66105564e-01 3.16264818e-01 2.74634605e-01 2.38095874e-01
 1.99970410e-01 1.56862224e-01 1.17513733e-01 8.35572258e-02
 5.25585981e-02 2.67075390e-02 1.27383959e-02 3.72086730e-03
 4.93767389e-05 2.36597283e-03 1.11176233e-02 2.67379523e-02
 4.80728756e-02 7.87932836e-02 1.14877369e-01 1.53776355e-01
 1.98613213e-01 2.50268120e-01 2.94347333e-01 3.42304362e-01
 4.12276434e-01 4.83109937e-01 5.59080943e-01 6.41448716e-01
 7.30262318e-01 8.29420869e-01 9.35225336e-01 1.04199557e+00
 1.14930480e+00 1.25392316e+00 1.36576006e+00 1.48260435e+00
 1.59539685e+00 1.71141403e+00 1.83080779e+00 1.92674239e+00
 2.01687600e+00 2.10129213e+00 2.17899207e+00 2.30058425e+00
 2.41662797e+00 2.50513100e+00 2.59161947e+00 2.67729736e+00
 2.76242581e+00 2.84206696e+00 2.96876415e+00 3.11382437e+00
 3.27723978e+00 3.44596393e+00 3.61666144e+00 3.78583380e+00
 3.97195714e+00 4.10928049e+00 4.27550811e+00 4.48848307e+00
 4.68836966e+00 4.87930980e+00 5.07678974e+00 5.28470492e+00
 5.45750758e+00 5.62420338e+00 5.78072025e+00 5.91730065e+00
 6.05826302e+00 6.20331739e+00 6.33360036e+00 6.47535932e+00
 6.54642735e+00 6.55571362e+00 6.56934188e+00 6.58895289e+00
 6.60231216e+00 6.60660128e+00 6.64232034e+00 6.60496407e+00
 6.52072034e+00 6.44295695e+00 6.35725934e+00 6.25800883e+00
 6.14711989e+00 6.05032571e+00 5.89979306e+00 5.73529061e+00
 5.57703601e+00 5.41789506e+00 5.24411883e+00 5.06098093e+00
 4.94005490e+00 4.94522311e+00 5.02027934e+00 5.10981983e+00
 5.19096696e+00 5.26195449e+00 5.31947699e+00 5.39573980e+00
 5.51407036e+00 5.63035022e+00 5.73597590e+00 5.83307291e+00
 5.91572364e+00 5.98269559e+00 5.93612643e+00 5.87050447e+00
 5.79290625e+00 5.70231587e+00 5.60623122e+00 5.50672902e+00
 5.39671267e+00 5.25551175e+00 5.15573480e+00 5.05072758e+00
 4.93925607e+00 4.81504073e+00 4.67476356e+00 4.52593325e+00
 4.40533751e+00 4.27463912e+00 4.13441452e+00 3.99204478e+00
 3.83972216e+00 3.67370880e+00 3.50327197e+00 3.32379009e+00
 3.22052812e+00 3.12476565e+00 3.02581115e+00 2.93864323e+00
 2.84467268e+00 2.74417796e+00 2.67618289e+00 2.56811916e+00
 2.45190935e+00 2.31982772e+00 2.18995005e+00 2.05330458e+00
 1.91494518e+00 1.80374293e+00 1.70322037e+00 1.59268789e+00
 1.47964205e+00 1.36749906e+00 1.25675650e+00 1.14407016e+00
 1.04278407e+00 9.52973118e-01 8.40655027e-01 7.23291821e-01
 6.08752547e-01 5.00735568e-01 3.99787757e-01 3.20559525e-01
 2.45947354e-01 1.77314157e-01 1.17240609e-01 6.80691938e-02
 3.01350929e-02 6.29736806e-03 2.70757562e-04 1.31811685e-02
 4.77517686e-02 1.05679870e-01 1.89044370e-01 2.94522215e-01
 4.22809006e-01 5.61581198e-01 6.82104107e-01 8.14773439e-01
 9.63143458e-01 1.13964122e+00 1.33453117e+00 1.53777885e+00
 1.74225692e+00 1.93517680e+00 2.15621619e+00 2.39558041e+00
 2.66157457e+00 2.96348698e+00 3.27603349e+00 3.57953278e+00
 3.89824579e+00 4.22117486e+00 4.56108553e+00 4.90375192e+00
 5.24075257e+00 5.57834174e+00 5.93502700e+00 6.23417932e+00
 6.54333141e+00 6.87656854e+00 7.20500057e+00 7.52139096e+00
 7.82165832e+00 8.13190417e+00 8.43758110e+00 8.75013619e+00
 9.06042305e+00 9.34228488e+00 9.61054194e+00 9.86238665e+00
 1.00534665e+01 1.02333343e+01 1.04074515e+01 1.05646473e+01
 1.07078710e+01 1.08163907e+01 1.08954665e+01 1.09777417e+01
 1.10740633e+01 1.11660922e+01 1.12573427e+01 1.13521734e+01
 1.14306994e+01 1.14771798e+01 1.16179805e+01 1.17899812e+01
 1.19356990e+01 1.20809396e+01 1.22273907e+01 1.23668434e+01
 1.24939296e+01 1.26931657e+01 1.29140194e+01 1.31200057e+01
 1.32666366e+01 1.33941941e+01 1.35074782e+01 1.36176687e+01
 1.38158791e+01 1.40086105e+01 1.41654988e+01 1.43113594e+01
 1.44242229e+01 1.44988651e+01 1.45432522e+01 1.46393368e+01
 1.46881752e+01 1.47474474e+01 1.47928961e+01 1.48096579e+01
 1.47900685e+01 1.47453801e+01 1.47465702e+01 1.47169211e+01
 1.46541621e+01 1.45759956e+01 1.44634949e+01 1.43344735e+01]
SPM{F} inference field
   SPM.effect    :   Main A
   SPM.z         :  (1x1000) raw test stat field
   SPM.df        :  (1.355, 70.330)
   SPM.fwhm      :  93.11867
   SPM.resels    :  (1, 10.72825)
Inference:
   SPM.alpha     :  0.050
   SPM.zstar     :  8.59945
   SPM.h0reject  :  True
   SPM.p_set     :  <0.001
   SPM.p_cluster :  (<0.001, 0.012)
