# Supplementary material for: The Application of Statistical Parametric Mapping to Evaluate Differences in Topspin Backhand between Chinese and Polish Female Table Tennis Players
Source: Appl Bionics Biomech. 2021 Jul 14;2021:5555874. doi: 10.1155/2021/5555874 (PMC8339346; doi:10.1155/2021/5555874)
Supplement: Supplementary Materials — Angles and accelerations. [file 5555874.f1.zip › Hip RT-Abduction (deg) cykleSPM.txt]

[ 84.23143635  83.96758531  83.70857537  83.57121893  83.62845468
  83.80344386  83.96368097  84.25442379  84.80669378  85.33266399
  85.85326163  86.39081379  86.97220521  87.86544239  88.98907758
  90.17951317  91.39762573  92.59621529  93.78885598  94.88878682
  95.94533443  96.88352332  97.96003793  99.20813301 100.6032932
 101.80908025 103.00947837 104.18225047 105.21125528 106.05814458
 106.89334069 107.72066122 108.64693416 109.92341606 111.16541202
 112.46133216 113.13305522 113.57666026 113.96924594 114.29347515
 114.6317838  115.38631172 116.16546173 116.8754644  117.51370408
 118.00708521 118.48415271 118.95336816 119.26847921 119.54784119
 119.50118489 119.24251057 118.97733528 118.58192355 118.2154059
 118.11338479 118.24551407 118.7091611  119.14771707 119.56360788
 119.86519728 120.01238421 119.98649912 120.05375392 120.10754396
 120.04933185 119.98754442 120.26053736 120.45521356 120.4760666
 120.5786122  120.98164993 121.32590633 121.67462501 122.16278356
 122.76059951 123.63782542 124.87190503 126.64538985 128.53907984
 130.41363081 132.18433458 133.82538236 135.33428951 137.0796112
 139.6019136  141.97869313 144.17123648 146.25892382 148.16754678
 150.36135818 152.65068978 155.29917551 157.8565816  160.30970012
 162.69000287 165.10377728 167.46528134 170.27050581 173.74408864
 177.00492394 180.14154223 183.01619262 185.53951601 187.96811887
 191.01117315 193.97391604 196.6841595  198.80806028 200.57520704
 202.07325365 203.18856064 205.67949271 208.94146858 211.76131081
 214.24450695 216.43693592 218.16712783 219.52291797 221.36451701
 222.10119251 222.60355461 222.83417813 222.7340879  222.69979453
 223.06016259 223.30067413 224.00879734 224.45229926 224.61269729
 224.5089851  224.27857891 224.93443187 224.32718964 223.83977454
 223.37684723 222.86736545 222.22390795 221.87594902 221.71201758
 221.26650057 220.5018704  219.58695066 218.529081   217.23526537
 215.90217179 214.62985116 213.61338426 212.58202412 211.42736927
 209.92770317 208.27903587 206.26394396 204.1809482  202.55768997
 201.05329327 199.47727033 197.91664695 196.33124415 194.6373066
 193.17251705 192.02612358 190.68901358 189.25278794 187.72859187
 186.09464533 184.53103351 183.38656593 183.11451409 183.26352453
 183.30894422 183.22676509 183.11571872 183.3800905  183.77663161
 184.03766206 184.2011553  184.15822825 184.1546849  184.17757095
 184.32260175 184.72878748 185.25622232 185.75604739 186.32681376
 187.14628109 188.00619807 188.99885777 189.96529122 190.93942429
 192.2199217  193.45429309 194.65994497 195.76372898 197.12782017
 198.54573249 199.98588322 201.51125028 203.01336892 204.55429692
 206.01475416 207.80034548 209.83006552 211.81805606 213.6113442
 215.19981394 216.55225902 217.80700796 219.13861546 220.23509535
 221.1140227  221.89032144 222.64272524 223.36402038 223.96061192
 224.09211477 223.82216617 223.46631642 223.14135945 222.75285979
 222.28986297 221.70904758 221.06116942 220.42709925 219.94365756
 219.58945159 219.30369502 219.10053363 218.98551197 218.87667301
 218.62876235 218.39521052 218.02232844 217.60791429 217.14960111
 216.8238006  216.82720044 216.76622343 216.65187038 216.33451576
 216.09320182 215.73995294 215.50127895 215.18856754 214.95279094
 214.87595032 215.02095586 215.12608193 215.17132819 215.36012728
 215.58337173 215.72572197 215.86691902 215.93917716 215.96636149
 215.95954518 216.14923245 216.57047244 216.86960839 216.9756858
 216.87152221 216.6467074  216.47940849 216.26275536 215.84069356
 215.35398317 214.62398897 213.75522483 212.89211275 212.20722531
 211.40090733 210.4994908  209.38612499 207.98092233 206.49289261
 204.70929254 202.86724983 201.02438704 199.13450394 197.2359855
 195.15241044 193.21910942 191.65495456 189.97222801 187.97904279
 185.91962038 183.6917008  181.39178191 179.28006604 176.90781956
 174.4711223  171.99220686 169.52394578 167.12815907 164.83114543
 162.45818166 159.94449042 157.39688203 154.92841762 152.5696397
 150.00672087 147.62024208 145.17401693 142.67744332 140.35215819
 138.14571423 136.09803834 134.29360598 132.61563832 130.93472281
 129.16876585 127.49012917 125.91564735 124.58859889 123.39797546
 122.15714431 120.87673885 119.56361411 118.47623398 117.42013169
 116.51529729 115.65753207 114.68579346 113.7140433  112.72228017
 111.7617962  110.74885946 109.69328799 108.73684326 108.08271526
 107.39398774 106.60298763 105.50326938 104.30159073 103.3170375
 102.0993597  100.63193154  99.12970895  97.58026434  95.79568514
  94.0326519   92.0790891   89.92877655  87.8386409   85.81662809
  83.91117034  82.19092342  80.30108941  78.68249877  77.06623756
  75.52596971  74.21200769  72.94447799  71.48823233  69.82354434
  68.57376484  67.29822858  65.99822093  64.76428104  63.57830884
  62.46363623  61.18209317  59.98842255  58.77531184  57.72943363
  57.06377835  56.3285543   55.56487959  54.85067452  54.03057566
  53.16754003  52.40800618  51.81417319  51.40466894  51.13937603
  50.87878779  50.61287646  50.34954776  50.08289319  49.83532544
  49.8088961   49.81091515  49.76406453  49.82310704  49.7641342
  49.70363955  49.70649302  49.63447502  49.58691038  49.50930291
  49.50204516  49.48494098  49.37091422  49.16460206  49.0244279
  49.0881059   49.22721994  49.39900613  49.63949191  49.83718659
  49.9891121   50.07539626  50.13387054  50.25541055  50.47524734
  50.55104042  50.56115768  50.42164207  50.14329124  49.70943994
  49.14835644  48.69901146  48.28915951  47.76280225  47.13562406
  46.46178114  45.58950125  44.68651898  43.84817996  42.9193249
  41.96484263  41.04781179  40.03030761  38.83817761  37.54190611
  36.21521841  34.90698134  33.73055116  32.68661159  31.70908175
  30.70086217  29.66975937  28.62873551  27.65503888  26.75913105
  25.95350004  25.23028316  24.58002058  23.98324346  23.42365538
  22.88044049  22.40247983  22.0493718   21.72616564  21.40245123
  21.0667784   20.72513279  20.37604463  20.06033722  19.80327938
  19.54115978  19.28472978  19.06355472  18.89609853  18.72879653
  18.56959753  18.42501751  18.28177805  18.15999934  18.07369784
  17.99827518  17.9257869   17.85110626  17.81514789  17.7481017
  17.69041296  17.6600913   17.62154759  17.57213109  17.48376331
  17.3881649   17.29539874  17.20974228  17.13128621  17.05065847
  16.94962538  16.82622194  16.71268177  16.60766905  16.54057765
  16.46649564  16.40700617  16.33539918  16.24469297  16.12302173
  16.01470218  15.94502857  15.87312948  15.81000428  15.76458378
  15.72508559  15.69303223  15.66129218  15.64120255  15.61466736
  15.58554989  15.55854885  15.54390132  15.5364912   15.51947673
  15.51034328  15.49795187  15.47779472  15.45075872  15.42219742
  15.41362814  15.41549286  15.43768581  15.43197099  15.40683281
  15.36553589  15.37858819  15.44321347  15.49906372  15.56335555
  15.63240849  15.68860651  15.74541511  15.7722547   15.75084003
  15.71642988  15.68001489  15.65063511  15.61515755  15.56518446
  15.46751084  15.38749584  15.28713489  15.17903442  15.07144243
  14.96122033  14.85357986  14.68774183  14.51864008  14.35275288
  14.1891673   14.05130346  13.94443183  13.83821491  13.71754068
  13.59523156  13.47676523  13.37470317  13.3136182   13.25336349
  13.18465537  13.11800454  13.03752975  12.97486509  12.95461364
  12.9291077   12.90442844  12.86813917  12.81518119  12.75802136
  12.70439151  12.66483486  12.64352417  12.6312458   12.63536161
  12.6327469   12.62765271  12.6291873   12.59267791  12.52101833
  12.45638124  12.42722936  12.45820141  12.52082785  12.58368035
  12.60715873  12.61015546  12.60974696  12.6379418   12.69035182
  12.74768243  12.81228469  12.81517884  12.77840977  12.74439711
  12.71442628  12.66149715  12.59645903  12.52844268  12.50161387
  12.49253069  12.47571518  12.44942095  12.40180458  12.31762182
  12.23648401  12.26975813  12.35071334  12.42433681  12.44583996
  12.4414093   12.41295233  12.37472791  12.38823359  12.40466446
  12.41731062  12.40411388  12.32823741  12.19831477  12.03935358
  11.87883359  11.71412884  11.55095525  11.33863996  11.14480929
  10.96277453  10.77736008  10.63737606  10.47980321  10.31173364
  10.13593405  10.00213011   9.89286369   9.77763817   9.59097962
   9.42018466   9.26286813   9.12229965   9.02158992   8.94806972
   8.87657055   8.78578784   8.70895058   8.63134732   8.55665367
   8.48935097   8.44266774   8.38453024   8.31525667   8.2404701
   8.1983011    8.1968984    8.2019016    8.20682819   8.21674351
   8.28588333   8.35031848   8.42554156   8.50871581   8.59334978
   8.67979951   8.76242808   8.84324169   8.92676246   9.00715716
   9.10514199   9.20301451   9.30188603   9.40599187   9.55609981
   9.72383287   9.88619012  10.05110515  10.21973827  10.3928105
  10.57798205  10.78261863  10.99098081  11.18181085  11.37167571
  11.54101189  11.70437354  11.8789634   12.07229723  12.27691639
  12.4616618   12.63311821  12.80866013  12.97929697  13.16170941
  13.35122957  13.5472957   13.74765152  13.93896867  14.14230441
  14.34799423  14.53174048  14.68901647  14.86202201  15.05372845
  15.23143324  15.43555562  15.65911638  15.8628294   16.04383388
  16.207861    16.35398449  16.48454078  16.63606426  16.7996022
  16.94809171  17.07811669  17.18428886  17.27406536  17.36521275
  17.47833938  17.59920235  17.72288051  17.83896315  17.94181683
  18.04224536  18.15368011  18.26332244  18.38530146  18.51532186
  18.64865942  18.77648166  18.9084163   19.03728027  19.13819059
  19.21573492  19.33055457  19.46708219  19.61677916  19.76235165
  19.91077244  20.01598991  20.1272865   20.21617983  20.31419154
  20.4203849   20.51568707  20.61709683  20.71728106  20.81732516
  20.88919897  20.96647725  21.07185941  21.14724323  21.22899868
  21.34643682  21.50072934  21.67968697  21.87442675  22.07077287
  22.27892969  22.49521031  22.72246793  22.93195454  23.14774573
  23.36110859  23.54540193  23.73653857  23.94287982  24.14908681
  24.36199261  24.64875264  24.94711288  25.26783385  25.58037178
  25.89891837  26.20562351  26.55301477  26.91507193  27.29672719
  27.73242988  28.19046837  28.65640029  29.08996806  29.53047182
  29.95281293  30.3972588   30.90964232  31.449899    31.95091337
  32.42493475  32.87194936  33.27398504  33.67609821  33.98043386
  34.21362368  34.38687571  34.54295382  34.67826022  34.79797357
  34.86805163  34.89188238  34.85065056  34.7644233   34.67231875
  34.55896122  34.44334328  34.25636239  34.01221154  33.78468201
  33.53153813  33.3084123   33.05310962  32.75424497  32.40054557
  32.04206743  31.7157405   31.35809196  31.05413985  30.74131512
  30.35988623  29.89185281  29.41968924  28.95012399  28.48829756
  28.10090606  27.71904191  27.3522815   26.90250511  26.43554387
  25.93262946  25.44106971  24.98284033  24.54218936  24.13541604
  23.77361221  23.38749378  23.00074432  22.60498861  22.29220326
  21.97185611  21.63454914  21.33925322  21.03079974  20.76699681
  20.48123195  20.18386633  19.89834064  19.62115301  19.37819286
  19.14074838  18.8975795   18.63907256  18.34608004  18.04461869
  17.71952473  17.39676232  17.06372073  16.73028803  16.39391013
  15.95939672  15.54696334  15.13882639  14.70160033  14.24823552
  13.80389071  13.35768342  12.96224293  12.64215249  12.29931717
  11.93479261  11.57703825  11.21703801  10.84585687  10.45795998
  10.08252014   9.69800139   9.33228681   8.97970443   8.64948937
   8.31917461   7.98228731   7.63901884   7.30625917   6.99043078
   6.69471749   6.40896418   6.12750512   5.86647126   5.54699181
   5.2611544    4.97873072   4.69320406   4.40818337   4.12624904
   3.87184337   3.69905198   3.56503502   3.42215965   3.27317696
   3.12569536   2.98616489   2.89603476   2.84424573   2.76681283
   2.68783854   2.60683366   2.52946501   2.46100875   2.41775436
   2.40350854   2.40807674   2.39870358   2.38830562   2.37910825
   2.3620815    2.36755232   2.43107728   2.51112649   2.58819697
   2.66809959   2.75772452   2.84684578   2.89784306   2.94374738
   3.00073488   3.05416269   3.10231049   3.16376132   3.23594987
   3.33697092   3.43430633   3.54443216   3.66007689   3.78311931
   3.91499321   4.05332338   4.19421483   4.33078864   4.47756844
   4.64043943   4.8294674    5.02961146   5.21653395   5.38707515
   5.55808031   5.76589659   5.99216723   6.24754561   6.54135898
   6.86025136   7.20768384   7.57629512   7.95061625   8.33756091
   8.77349201   9.27678567   9.7919062   10.35606952  10.98720935
  11.66861601  12.41530417  13.20430486  14.00681886  14.81492794
  15.69713319  16.60886765  17.55835716  18.55583764  19.58897711
  20.65337164  21.74370819  22.95879062  24.26232384  25.59807094
  26.99229252  28.44015962  29.87041822  31.33519969  32.88874696
  34.5501822   36.24988873  37.98339022  39.82799711  41.85301111
  43.99714363  46.20560271  48.53553204  50.85165276  53.17469121
  55.65132242  58.16802054  60.72010776  62.88775963  64.93446108
  66.90955029  68.59757908  69.96904877  71.23554545  72.41048237
  73.24164528  73.87978751  74.39516117  74.76409103  75.08561993
  75.24915797  75.39347762  75.31281216  75.16433328  75.00298483
  74.77694472  74.4821299   74.06230586  73.64088459  73.72317225
  73.8777368   73.97172491  74.01568313  73.98914387  73.8963524 ]
SPM{F} inference field
   SPM.effect    :   Main A
   SPM.z         :  (1x1000) raw test stat field
   SPM.df        :  (1.453, 79.212)
   SPM.fwhm      :  112.75900
   SPM.resels    :  (1, 8.85960)
Inference:
   SPM.alpha     :  0.050
   SPM.zstar     :  7.86306
   SPM.h0reject  :  True
   SPM.p_set     :  <0.001
   SPM.p_cluster :  (<0.001, 0.012)
