# Supplementary material for: The Application of Statistical Parametric Mapping to Evaluate Differences in Topspin Backhand between Chinese and Polish Female Table Tennis Players
Source: Appl Bionics Biomech. 2021 Jul 14;2021:5555874. doi: 10.1155/2021/5555874 (PMC8339346; doi:10.1155/2021/5555874)
Supplement: Supplementary Materials — Angles and accelerations. [file 5555874.f1.zip › Hip RT-Flexion (deg) cykleSPM.txt]

[35.01399744 36.08113101 37.14989261 38.17924329 39.16519603 40.14026128
 41.13294713 42.08349753 43.13744141 44.16652074 45.18253646 46.15809663
 47.10630196 48.01172798 48.85126027 49.48990619 50.06741999 50.60570978
 51.07251471 51.48373317 51.86265412 52.14802554 52.24539605 52.30759124
 52.29804984 52.25105435 52.16852821 52.08709863 52.03818002 52.00292615
 51.94873358 51.90569413 51.87384822 51.85379819 51.83116776 51.73262787
 51.47317377 51.2120913  50.93349137 50.68222983 50.44326854 50.27023757
 50.12240322 49.84278623 49.60733477 49.42551863 49.25151346 49.06214849
 48.85444089 48.47640843 47.90691327 47.38895385 46.88667571 46.40342415
 45.97027018 45.64672328 45.27466593 44.75164463 44.25665161 43.82058768
 43.40106886 43.02381969 42.69966935 42.34264341 41.89803467 41.49097491
 41.10553104 40.72594239 40.38455061 40.16155757 39.94920475 39.79078431
 39.612236   39.47185233 39.38597486 39.34629783 39.40202863 39.41890723
 39.36595351 39.28620742 39.19750248 39.11034705 39.0472327  39.05721561
 39.00054966 38.90645727 38.81153667 38.68909642 38.55230194 38.43488473
 38.36721848 38.2861914  38.19010951 38.1111253  38.05173068 38.00460209
 38.04092398 38.15129132 38.28143806 38.45399347 38.63675866 38.82249995
 39.07743453 39.36977862 39.69303003 40.05667147 40.41071807 40.75902002
 41.11038144 41.45871341 41.81824396 42.18180609 42.52253362 42.81726637
 43.03377079 43.22614265 43.36829922 43.49971666 43.59271295 43.64071527
 43.63503825 43.60814742 43.55964014 43.4945236  43.39242445 43.25570336
 43.16100198 43.04859474 42.91084031 42.77978148 42.61703353 42.43297908
 42.29171768 42.19625585 42.15505394 42.10192041 42.03442105 41.96846786
 41.91308241 41.82100054 41.66652014 41.52359732 41.38697446 41.2369199
 41.06337168 40.84176362 40.5631221  40.29502981 40.01960127 39.74262826
 39.45263053 39.24596483 39.03712766 38.86139009 38.76959865 38.64958151
 38.56619344 38.48047439 38.40355429 38.33404046 38.31373503 38.38861895
 38.61739272 38.8391176  39.04630708 39.26348652 39.44560715 39.6138728
 39.78165986 39.94772872 40.10875514 40.2603923  40.42154793 40.50465143
 40.57435411 40.68997075 40.82663685 40.97119398 41.10853299 41.22906429
 41.36141216 41.45108416 41.48695691 41.5030971  41.52742398 41.56248467
 41.59174457 41.62613332 41.67077751 41.72498111 41.75348569 41.76136543
 41.74255687 41.73269505 41.87850071 42.04601215 42.20257232 42.32263516
 42.42782645 42.49058062 42.54259082 42.67066153 42.76424573 42.79787657
 42.79959257 42.77982174 42.71454252 42.6033382  42.46015008 42.33149566
 42.23182172 42.20048498 42.15033796 42.08728351 41.9908578  41.83110464
 41.62850511 41.44348707 41.32470585 41.17559961 41.00846774 40.80806666
 40.58465978 40.4393699  40.30957528 40.1932715  40.04717417 39.87427572
 39.69107543 39.49593686 39.27256578 39.04040709 38.83856074 38.65873091
 38.46884826 38.28668735 38.0768002  37.80252405 37.52207266 37.29169894
 37.07538792 36.8524583  36.61514882 36.37859388 36.20464694 36.05165979
 35.91554239 35.76856763 35.60881006 35.50018864 35.41363185 35.24109399
 35.06054391 34.8400308  34.63588002 34.41949408 34.19761913 33.96987444
 33.77018359 33.59848337 33.47557648 33.36167992 33.24670574 33.1386922
 33.04341435 32.9796201  32.91691156 32.85107321 32.79677591 32.71614177
 32.65440874 32.60632881 32.59417152 32.59023744 32.57294782 32.53401677
 32.49530638 32.45960617 32.42347111 32.39898726 32.38643939 32.38128144
 32.3641511  32.34253482 32.34293861 32.32522631 32.25974376 32.20285795
 32.16176141 32.11672383 32.06879729 32.02471966 31.98109671 31.93450389
 31.92984349 31.87495977 31.81694769 31.778175   31.76175215 31.7325038
 31.69870641 31.64294414 31.56464553 31.50509862 31.47805355 31.5089343
 31.52872096 31.53933115 31.54619816 31.54964179 31.59639252 31.67439964
 31.73652038 31.76925129 31.76235235 31.71000469 31.57839402 31.40180961
 31.22523795 31.04655788 30.75675297 30.38317528 29.89958549 29.33358618
 28.76830649 28.166614   27.55076802 26.8678988  26.29666648 25.81404888
 25.32442218 24.83089125 24.31030924 23.77141771 23.27309517 22.77724721
 22.25583086 21.71745507 21.15926908 20.5872443  19.99125302 19.43489407
 18.90853718 18.35474999 17.74352078 17.119954   16.42775179 15.71478386
 15.17802694 14.69950783 14.19623755 13.66346235 13.09620736 12.52356356
 11.97546301 11.48139563 11.00423997 10.57289756 10.23564781  9.89979437
  9.57326513  9.24428136  8.87499054  8.50337896  8.23674641  8.05843926
  7.8793268   7.70010178  7.51848815  7.28135694  7.05748209  6.82385095
  6.58460759  6.33629107  6.08458032  5.85370132  5.716947    5.57636069
  5.41792443  5.23475786  5.04192806  4.83922162  4.6347002   4.49038069
  4.34252981  4.19118466  4.03700657  3.89368175  3.76939121  3.64016578
  3.56459987  3.49928592  3.44393984  3.39416206  3.32717796  3.26226004
  3.19890604  3.11928999  3.04267111  2.97464569  2.91548535  2.86049836
  2.81214998  2.77978001  2.77186294  2.76760968  2.77371002  2.79724181
  2.82320598  2.84388993  2.88320841  2.94680116  3.01234416  3.08338818
  3.16099759  3.24682554  3.3279415   3.41350179  3.50569707  3.59511143
  3.683727    3.78784054  3.89890856  4.00475525  4.10782952  4.21136462
  4.31445626  4.4255717   4.5539107   4.68376601  4.79999561  4.92816335
  5.08782222  5.25105201  5.42203176  5.59479274  5.75911459  5.92157763
  6.10025643  6.29213752  6.48897885  6.70454852  6.92831048  7.14984407
  7.39530846  7.66701173  7.95619706  8.24476622  8.54057762  8.85167716
  9.161225    9.47723588  9.78458798 10.10118567 10.42113671 10.76191705
 11.12552977 11.483084   11.80796821 12.11924432 12.42128855 12.71267978
 13.00632203 13.31170893 13.60253417 13.86806712 14.10924613 14.3487025
 14.57129144 14.80727873 15.0619326  15.26529444 15.47956468 15.734272
 15.99196778 16.24699783 16.50889484 16.76959785 17.02758028 17.28837511
 17.50545217 17.7111327  17.92415692 18.12380324 18.33215369 18.53268706
 18.73039275 18.9486737  19.16422076 19.38131711 19.59645748 19.77668999
 19.94817931 20.09054758 20.20227578 20.26773621 20.32361816 20.32791318
 20.2955334  20.26394074 20.21130796 20.14283919 20.05591214 19.95493136
 19.79054371 19.56712786 19.32263963 19.10062048 18.79169229 18.45206766
 18.10111545 17.82605994 17.59528895 17.38844956 17.18126655 16.9525164
 16.71991456 16.48216111 16.32621551 16.18323627 16.02884838 15.86707618
 15.66553618 15.45280012 15.24165163 15.02437277 14.78809305 14.54432051
 14.29225255 14.01148125 13.7371386  13.46295888 13.20021488 12.93905106
 12.67016275 12.38509166 12.06538156 11.75865408 11.450253   11.13737967
 10.81113463 10.48295255 10.18608666  9.93126773  9.67710203  9.4198616
  9.18576367  8.96747529  8.75695849  8.5414534   8.32067108  8.10069487
  7.89123614  7.68378073  7.46176252  7.23220569  6.9946555   6.7493907
  6.50458623  6.2598612   6.06137174  5.91089403  5.76138798  5.58687524
  5.39413595  5.20450507  5.01391725  4.84131132  4.68667802  4.53277805
  4.40502125  4.29900897  4.19873658  4.10539199  4.02585201  3.9583455
  3.88910271  3.8385301   3.79748605  3.74788909  3.70333662  3.66995162
  3.64524512  3.62071933  3.64672542  3.69992715  3.75783693  3.82335963
  3.88891131  3.95926524  4.03724618  4.15851036  4.29552438  4.43545321
  4.5723901   4.71536738  4.86312635  5.01233303  5.16094932  5.31376612
  5.4686201   5.64773446  5.82142969  5.99617625  6.17717253  6.34715925
  6.51688511  6.68764139  6.86807535  7.08893189  7.33874473  7.59083706
  7.85186354  8.11491502  8.38221326  8.66401029  8.99023361  9.34204114
  9.70049814 10.12621367 10.55839024 10.98608868 11.41810428 11.83729867
 12.25715435 12.67832665 13.2095965  13.73980998 14.30252506 14.909027
 15.51186163 16.13324263 16.76260377 17.45821469 18.15684419 18.87200063
 19.61451    20.37815951 21.16575012 21.95063854 22.69147768 23.43675034
 24.11676286 24.76216068 25.43732583 26.13092807 26.8356827  27.58658154
 28.33726229 29.07655517 29.82161537 30.55962087 31.29402818 32.03816011
 32.78801637 33.55558785 34.36611727 35.21281467 36.04817951 36.8624701
 37.65823949 38.40927691 39.14469148 39.90298204 40.65959252 41.51291427
 42.41049845 43.25802416 43.99799526 44.74756221 45.41156833 46.05209192
 46.58650026 47.10875151 47.73634027 48.44281721 49.1560969  49.79413836
 50.41604647 50.96032496 51.44421224 51.97924855 52.56670014 53.14710852
 53.72223083 54.29942497 54.94306301 55.61375903 56.28830286 56.94553527
 57.61333304 58.32988786 59.05605152 59.74014162 60.42946378 61.0599295
 61.6003477  62.11937655 62.63587849 63.12871966 63.63268098 64.16769352
 64.75326107 65.29576259 65.75305317 66.18304384 66.61267975 67.03970671
 67.43500256 67.74769466 68.03023278 68.34095507 68.68809531 69.03656174
 69.4024219  69.78517404 70.14365591 70.48895597 70.90691058 71.33147688
 71.75207925 72.21932414 72.71334453 73.20392193 73.70683662 74.23930908
 74.78119988 75.13244166 75.42238086 75.71207225 75.93951188 76.16625479
 76.41599932 76.5447112  76.6258426  76.71349236 76.80626826 76.86368819
 76.91369086 77.32407516 77.78800202 78.23228861 78.62981708 78.98746613
 79.35075438 79.83006102 80.30037983 80.75064048 81.15511064 81.47616738
 81.74309845 81.90685231 82.06724931 82.20044855 82.30982862 82.39393526
 82.41786252 82.34058685 82.30765955 82.24619938 82.11872825 81.9382013
 81.78393652 81.67307605 81.54146841 81.54711444 81.53815395 81.50256053
 81.44032513 81.57831111 81.66472466 81.68078375 81.50197968 81.28122287
 81.0341187  80.8829708  80.6661587  80.43205598 80.16887185 79.86777822
 79.55144389 79.34152606 79.11946208 78.86265539 78.53688766 78.17955964
 77.75361825 77.18761587 76.57993936 75.95689564 75.24729766 74.44958157
 73.66162574 72.93994789 72.14430991 71.28744079 70.34517202 69.30975732
 68.33089926 67.37268915 66.37560643 65.30330603 64.18066158 63.01871638
 61.82322297 60.652232   59.43898021 58.20264569 57.02298859 55.83588865
 54.64320089 53.43641167 52.19550728 50.94995772 49.73876638 48.65372808
 47.57045319 46.47475072 45.37792453 44.23722293 43.1374678  42.07319709
 41.1258402  40.2327752  39.34750692 38.44976199 37.53831105 36.74126673
 35.9625966  35.13358257 34.29413398 33.4266475  32.55318015 31.70166641
 30.83857405 29.93784466 28.98955746 28.05475325 27.09653399 26.12062792
 25.2457758  24.30941044 23.36329801 22.41344317 21.45999449 20.51991883
 19.58297937 18.71018042 17.91524282 17.17797555 16.4684531  15.75971364
 15.05843819 14.34858396 13.70551553 13.1833564  12.73604316 12.31441999
 11.89442783 11.47685834 11.04929076 10.64119759 10.3287975  10.03715097
  9.73707518  9.42863259  9.11091332  8.78188739  8.46945225  8.20591258
  7.94319506  7.67621142  7.40654191  7.12238684  6.82460641  6.5645691
  6.40651607  6.23118294  6.04362053  5.85462572  5.65948308  5.4579615
  5.26842146  5.1349606   5.00526279  4.86327897  4.71423508  4.56238651
  4.41142979  4.29464933  4.15602477  3.99820695  3.83022159  3.65166392
  3.46906763  3.28262268  3.11858516  2.97077439  2.82528655  2.68709799
  2.55439616  2.42994394  2.30357439  2.19829452  2.13395768  2.07654245
  2.02329986  1.96229126  1.90300764  1.84397367  1.80163394  1.79227185
  1.79327376  1.79421104  1.80241777  1.82190028  1.84710213  1.93203829
  2.03557505  2.13160607  2.22624143  2.32887825  2.42967668  2.52321172
  2.6133519   2.73141995  2.87026273  3.01960549  3.2068913   3.4269095
  3.66056266  3.85660657  4.06301319  4.26975241  4.46426972  4.66417924
  4.859981    5.04362845  5.22219709  5.40687881  5.6060842   5.81407736
  6.02161643  6.21586429  6.40214432  6.56561184  6.67623523  6.78990205
  6.90364913  7.01608692  7.13668688  7.25122045  7.3236816   7.37160653
  7.4109152   7.44566301  7.46657928  7.49207823  7.50730818  7.51378142
  7.51239963  7.50969653  7.49519354  7.46147269  7.41451139  7.36722635
  7.52123249  7.71417902  7.8972538   8.07380528  8.24709964  8.44716981
  8.63651554  8.86405139  9.1060632   9.34457646  9.55607733  9.7941927
 10.03442953 10.29747417 10.64043472 10.98144648 11.30113845 11.61708085
 11.92256568 12.19144943 12.43742688 12.75137669 13.03780881 13.34370932
 13.64503036 13.93773943 14.21229751 14.49309678 14.98555368 15.50861051
 15.99973377 16.47699085 16.92679379 17.35316378]
SPM{F} inference field
   SPM.effect    :   Main A
   SPM.z         :  (1x1000) raw test stat field
   SPM.df        :  (1.759, 111.654)
   SPM.fwhm      :  123.81302
   SPM.resels    :  (1, 8.06862)
Inference:
   SPM.alpha     :  0.050
   SPM.zstar     :  6.76241
   SPM.h0reject  :  True
   SPM.p_set     :  <0.001
   SPM.p_cluster :  (<0.001, 0.001, <0.001, 0.024)
