# Supplementary material for: The Application of Statistical Parametric Mapping to Evaluate Differences in Topspin Backhand between Chinese and Polish Female Table Tennis Players
Source: Appl Bionics Biomech. 2021 Jul 14;2021:5555874. doi: 10.1155/2021/5555874 (PMC8339346; doi:10.1155/2021/5555874)
Supplement: Supplementary Materials — Angles and accelerations. [file 5555874.f1.zip › Hip RT-Rotation Ext (deg) cykleSPM.txt]

[ 96.17091855  95.6731985   95.1104264   94.46983439  93.79014869
  93.17253062  92.5763582   91.88798249  91.64797008  91.34663853
  91.01218251  90.6343501   90.19376235  89.80187074  89.5234156
  89.3288281   89.06737558  88.72633464  88.35842375  87.99456034
  87.55310225  87.11062605  86.75233244  86.41017478  86.11992334
  85.83704993  85.51814153  85.14360618  84.75772673  84.50622339
  84.24195926  84.11194079  84.01644011  83.94198893  83.87623167
  83.77085581  83.75784584  83.71396563  83.63589655  83.54346809
  83.43191736  83.28373243  83.14529985  83.04177107  82.93197979
  82.82628812  82.67240317  82.46308927  82.27824183  81.93460712
  81.30371556  80.62717855  79.95757047  79.29386004  78.63440807
  78.102587    77.75234377  77.4484726   77.1501908   76.8761066
  76.49960104  76.07410847  75.87952789  75.89843792  75.99733534
  76.08782713  76.23077677  76.45262813  76.6976317   77.27197284
  77.71569488  78.04773921  78.4660152   79.05363539  79.71876483
  80.46486303  81.4462628   82.21229162  82.89619806  83.62290793
  84.34841033  85.0676308   85.7431365   86.54968419  87.12728749
  87.56529336  87.85142123  87.99782281  88.06628891  88.13109796
  88.00247016  87.72752184  87.26676503  86.65937574  85.84416755
  84.87333189  83.84702726  82.73963444  82.01616558  81.48538336
  80.7435278   79.84909341  78.86079076  77.7432918   76.9035044
  76.02239281  75.15875425  74.25085344  73.29594729  72.27611088
  71.22010533  70.36431409  70.11205091  70.06247425  70.09012383
  70.08779624  70.03395553  69.9351384   70.08686328  70.85237878
  71.61808108  72.37372742  73.10038935  73.79144142  74.53374575
  75.81826873  76.89471975  77.98207945  79.04665216  80.06408566
  80.99865842  81.82554933  82.67203865  83.30926022  83.95406159
  84.5580587   85.10262436  85.5632184   85.94196971  86.53610188
  87.38768215  88.05635307  88.62306103  89.05154721  89.29559334
  89.36815647  89.23306243  89.09805465  89.00526882  88.85941947
  88.62641534  88.29697184  87.88482131  87.42380122  86.94522405
  86.38475902  85.9492336   85.47537049  84.95395355  84.37294054
  83.78387093  83.2790029   82.85253293  82.34289053  81.77546498
  81.18739492  80.54083323  79.87861141  79.23842385  78.53717698
  77.78683816  76.95607636  76.14017719  75.37542422  74.77537267
  74.3778396   74.19190998  73.99082843  73.70559295  73.3698535
  73.33099876  73.54232742  73.90805795  74.39448037  74.95844491
  75.51111535  76.06694976  76.8135309   77.75190303  78.94925788
  80.4273255   81.90209824  83.35727723  84.85258463  86.59967668
  88.58123432  90.79339335  93.34500466  96.00188384  98.66152987
 101.34639987 104.20027964 107.24889728 110.40425145 113.74323284
 117.11087725 120.39267715 123.59108002 126.7452229  130.16253415
 133.67134628 137.05988837 140.41280894 143.74128453 147.04612222
 150.18780967 153.37840398 156.54973108 159.67846571 162.66936492
 165.52207409 168.14797494 170.65319067 172.9035398  174.8338318
 176.41641078 177.77906098 178.77997296 179.59957559 180.36871343
 180.82967152 180.91525034 180.51328343 180.54351748 180.50934434
 180.48450965 180.43663155 179.77453449 178.9479654  178.20849178
 177.36872327 176.40148111 175.37459593 174.36992161 173.36157742
 172.47200544 171.90430052 171.13979367 170.21077623 169.53341769
 168.82463845 167.77867924 166.70494142 165.91133185 165.09862917
 164.15591406 162.99413151 161.69949724 160.87375711 160.12598671
 159.56331366 158.95386219 158.26582958 157.79588665 157.46197592
 157.45124231 157.44021901 157.7018855  157.96378791 158.22604908
 158.47911776 158.73855245 159.57431276 160.37486453 161.34515486
 162.21345806 162.82071498 163.42962441 163.94978295 164.53712982
 165.21799561 166.05875734 166.74515575 167.3676984  168.11339876
 168.79158979 169.4647907  170.42854817 171.83195192 173.08772891
 174.35868974 175.73081979 177.17596419 178.98590573 181.2850655
 183.73030131 185.96444242 187.92571386 189.91561111 192.35230097
 195.37274457 198.3991719  201.40393365 204.29457097 207.19705905
 210.38291337 212.93023739 214.83985834 216.48332458 217.87990232
 219.11589622 219.77894564 220.13816177 220.32325214 220.09740449
 219.20030911 217.94622242 216.38582299 214.35634212 212.05635151
 210.18570391 208.5489707  206.48077769 204.0227379  201.44012928
 198.2852123  194.86337212 192.11973217 189.98506979 188.09768635
 186.6548448  185.10201424 183.9362962  182.49943033 181.02851294
 179.40136507 177.65928288 176.00578228 173.96688878 172.13106284
 170.11463516 169.131411   168.3390326  167.08531937 165.41615182
 163.27763634 161.02493895 158.05375455 155.8110128  153.80916561
 151.45007584 149.06125014 146.11461383 142.82190061 139.29849377
 135.74736642 132.22505369 128.78893644 125.83276255 122.66028853
 119.48049161 116.69228637 114.08766671 111.45548172 109.18342641
 107.23470478 105.03335718 102.79742203 100.86327052  98.80175168
  96.60185027  94.48120852  92.55803406  90.57947561  88.89687278
  87.26320477  86.12805476  84.88097361  83.64653863  82.56192082
  81.61890996  80.90743661  80.28024178  80.12397458  79.85609548
  79.55779879  79.4632828   79.42095656  79.21779019  78.99198519
  79.17597683  79.31843908  79.55790748  79.96403888  80.28037133
  80.59984033  80.93064391  81.5807161   82.15590248  82.86852597
  83.62612715  84.53040383  85.35114328  86.17509416  87.24346386
  88.25129073  89.34651718  90.59320815  91.78310973  92.96794992
  94.058414    95.08329988  96.01370673  96.88859272  97.65700389
  98.31411116  98.93658997  99.59830069 100.27147365 100.87108864
 101.31078272 101.61913854 101.94477308 102.08463134 102.31351592
 102.65411232 102.83740155 102.80393314 102.72363613 102.5957048
 102.3406076  102.1633203  102.49461846 102.78980901 102.89481059
 102.9250947  102.83771499 102.63908354 102.3852568  102.04011205
 101.61605894 101.05642621 100.36600389  99.71964696  98.99044709
  98.06447436  96.95612967  95.79199609  94.62964011  93.48896568
  92.28668448  91.05294924  90.06711282  89.29348697  88.58385256
  87.94883467  87.36336695  86.74475315  86.08316439  85.3617542
  84.70090548  84.06592217  83.63261155  83.40824834  83.12226725
  82.81523469  82.73655564  82.71571443  82.70247054  82.94104392
  83.59332652  84.20118755  84.83449484  85.84110057  86.90908386
  87.93460492  89.09174487  90.42955714  91.74874312  93.07150136
  94.50290554  95.89442923  97.26131369  98.70928058 100.21560801
 101.62938703 103.02839136 104.69173953 106.328567   107.82343292
 109.2206586  110.44334364 111.56000898 112.58584634 113.36547767
 114.07736028 114.69106147 115.1021874  115.09260756 114.88941914
 114.7012418  114.38261937 113.94971355 113.40130074 112.45555724
 111.15707178 109.70105323 108.16799385 106.47845524 104.65911723
 102.79175397 100.77112956  98.58077098  96.34123372  94.02763655
  91.74023212  89.43317898  87.0899757   84.81912982  82.52193002
  80.17381911  77.83496002  75.76004121  73.70787751  71.64784172
  69.58313378  67.47936739  65.39067999  63.33535926  61.32863489
  59.34952567  57.44139743  55.75297841  54.11915242  52.4885334
  50.87901603  49.32124094  47.8531353   46.40121462  45.11247738
  43.85833822  42.61961037  41.46747397  40.45327594  39.41046208
  38.4486224   37.57034774  36.67695049  35.79561817  34.929608
  34.01538032  33.0892571   32.22403507  31.48866762  30.7668443
  30.08962211  29.36970381  28.58705214  27.81653839  27.07752987
  26.44526534  25.87065563  25.28402722  24.66402617  24.02435938
  23.39085885  22.7280369   22.0913827   21.49568628  20.86368283
  20.21041101  19.54296625  18.90344996  18.25876189  17.61101524
  16.96592425  16.30684589  15.59745623  14.8632443   14.09090391
  13.27884083  12.47296261  11.6861707   10.90268603  10.30720267
   9.80706838   9.30823964   8.81976781   8.34336248   7.88185215
   7.42765425   7.05203957   6.70290999   6.34852363   6.01705824
   5.70902838   5.40758598   5.10667706   4.88012579   4.67429833
   4.46773086   4.28278004   4.11010455   3.94541936   3.78933828
   3.67519058   3.57260617   3.47943366   3.39014039   3.32222929
   3.2727347    3.22281278   3.13842043   3.05345732   2.95571494
   2.87237413   2.81621157   2.77636778   2.73790785   2.74680577
   2.73624022   2.72063725   2.70895368   2.69669582   2.68556755
   2.68250645   2.75647998   2.83041475   2.92026572   3.03005863
   3.15889308   3.29876088   3.45783457   3.68482563   3.92107192
   4.17835121   4.45693254   4.76133486   5.10260689   5.44960147
   5.80991304   6.17509206   6.54953156   6.93742496   7.34826841
   7.77772291   8.22165692   8.70042811   9.18909219   9.70962615
  10.26105196  10.8530486   11.4700527   12.1064102   12.77605116
  13.44847404  14.15353692  14.85914299  15.61973899  16.42092045
  17.25772949  18.167856    19.10830136  20.02280598  20.95968065
  21.93554     22.94573047  24.01417133  25.18541242  26.38437054
  27.54026756  28.69960374  29.9536161   31.25646631  32.60196757
  34.01365799  35.45881934  36.87320358  38.29965142  39.76813393
  41.24661922  42.77502226  44.340878    45.91720858  47.48029799
  48.97823677  50.4944478   52.06099036  53.68421368  55.34379279
  56.96446667  58.58189305  60.23023157  61.89384007  63.54468019
  65.14027103  66.63815229  68.08007858  69.48319571  70.80216396
  72.19824624  73.70062479  75.22174662  76.76613244  78.34100709
  79.92113344  81.45322121  83.00618541  84.59545975  86.06675474
  87.46381091  89.05572193  90.76381703  92.51561964  94.47154054
  96.464563    98.49980786 100.54664058 102.60716046 104.54125962
 106.39884811 108.16905093 109.81896561 111.68290905 113.55964178
 115.57873031 117.61187721 119.57670513 121.23413235 122.58774893
 123.86989036 125.13874498 126.34903148 127.37264391 128.13062756
 128.66020756 128.97125824 129.53923277 130.0080225  130.46421954
 131.0714439  131.56569768 131.95281364 132.14090897 132.47878791
 132.898822   133.22439149 133.46834483 133.67640716 133.99362792
 134.2764104  134.70325361 135.35094247 136.37813617 137.23270459
 137.93587375 138.74344145 139.58733398 140.33116585 141.13563897
 142.06568986 142.74456345 143.23493591 143.91333975 144.61068824
 145.11919657 145.67483592 146.75811725 147.68482701 148.54190001
 149.89893681 151.33035715 152.88688484 154.28409377 155.42943809
 156.64272153 157.68860131 158.49212775 159.24049983 159.84763123
 160.57606337 161.39722798 162.07711615 162.51376636 163.25219534
 163.969231   164.11668586 163.81080801 163.21813076 162.45081009
 161.47770341 161.20852852 161.27260023 161.89937725 162.22594669
 162.29460031 161.70185616 160.82532031 159.61922243 158.63652062
 158.32923757 157.79034042 156.9593497  155.75698038 154.08393598
 152.35083664 150.5357717  148.69807043 146.33726944 143.70631144
 140.79780887 137.70806808 134.03721446 130.46543211 127.01365527
 123.65192628 120.13002747 116.72433992 113.35759407 110.3437042
 107.34629365 104.34243672 101.64111924  98.99933867  96.51995433
  94.1536936   92.35715104  90.77050457  89.22317461  87.83278298
  86.43029228  85.1270886   83.81859484  82.78989791  81.81141746
  80.78681154  79.70537032  78.60854965  77.68319067  76.82200801
  76.02082354  75.23030016  74.41443616  73.55858495  72.5805957
  71.60931293  70.64888721  69.87667528  69.06285864  68.36613987
  67.68111048  67.00208335  66.4104302   65.76427877  65.34726126
  65.02102434  64.79193901  64.57120012  64.34790079  64.08170725
  63.7823574   63.29486701  62.9585426   62.72959204  62.44738856
  62.09379845  61.64435909  61.0900808   60.62447342  60.90677389
  61.2880069   61.64285432  61.92398453  62.10752741  62.23256535
  62.41454998  62.89327914  63.29361866  63.69521897  64.06401734
  64.39744745  64.63511702  64.8592519   65.48015847  65.92153533
  66.28489361  66.56040492  66.78743317  66.91037051  67.08706937
  67.11603836  67.2476214   67.35753107  67.37585876  67.37448117
  67.30619931  67.31744491  67.38558057  67.59377785  67.79235192
  67.96711767  68.14732148  68.26424215  68.41847103  68.607349
  68.81962959  69.01569851  69.16182904  69.3045007   69.42811496
  69.63611823  69.97212937  70.32917349  70.63523212  70.92248116
  71.20839552  71.46645648  71.85275994  72.36592457  72.80072591
  73.20762074  73.55562096  73.77984997  73.86880014  73.88561165
  73.94886963  74.12401906  74.3097674   74.58884194  75.01760555
  75.45822507  75.71811497  75.98591143  76.1564319   76.27132379
  76.37918278  76.48804436  76.5260614   76.4096078   76.19204266
  75.99749088  75.86205394  75.71443038  75.54507428  75.32875228
  75.14624901  74.82657275  74.5305097   74.26768283  74.00117487
  73.77474387  73.51467377  73.36316212  73.19606329  73.02071752
  72.82119527  72.65241208  72.44345765  72.15048075  72.00997929
  71.86349359  71.69359877  71.50507562  71.28066392  71.03829047
  70.70235483  70.76911417  70.93236539  71.01452054  71.06469632
  71.11083342  71.16608191  71.1982221   71.60020322  72.08778486
  72.51489111  72.82425737  73.07251577  73.24441995  73.41961886
  73.76193791  74.10872446  74.37938751  74.59227763  74.75339742
  74.79553258  74.70500928  74.76341609  74.70859036  74.61651579
  74.44776541  74.21319471  73.90287946  73.52747214  73.27940846
  72.97175951  72.57797765  72.12022801  71.57476482  70.97696708]
SPM{F} inference field
   SPM.effect    :   Main A
   SPM.z         :  (1x1000) raw test stat field
   SPM.df        :  (1.997, 121.825)
   SPM.fwhm      :  78.97992
   SPM.resels    :  (1, 12.64879)
Inference:
   SPM.alpha     :  0.050
   SPM.zstar     :  6.79054
   SPM.h0reject  :  True
   SPM.p_set     :  <0.001
   SPM.p_cluster :  (<0.001, <0.001)
