# Supplementary material for: The Application of Statistical Parametric Mapping to Evaluate Differences in Topspin Backhand between Chinese and Polish Female Table Tennis Players
Source: Appl Bionics Biomech. 2021 Jul 14;2021:5555874. doi: 10.1155/2021/5555874 (PMC8339346; doi:10.1155/2021/5555874)
Supplement: Supplementary Materials — Angles and accelerations. [file 5555874.f1.zip › Knee LT-Flexion (deg) cykleSPM.txt]

[2.16259635e+00 2.21713614e+00 2.27118199e+00 2.32447371e+00
 2.37197286e+00 2.41668226e+00 2.45824274e+00 2.50480426e+00
 2.59172897e+00 2.67898477e+00 2.76636923e+00 2.85741171e+00
 2.95045191e+00 3.03775231e+00 3.12717166e+00 3.24799464e+00
 3.36875352e+00 3.48661868e+00 3.60622159e+00 3.72473100e+00
 3.84619842e+00 3.96422579e+00 4.05805751e+00 4.15813081e+00
 4.25935806e+00 4.35572085e+00 4.45374612e+00 4.54868991e+00
 4.63504847e+00 4.69821675e+00 4.76341846e+00 4.82480186e+00
 4.88333493e+00 4.94316786e+00 5.00480974e+00 5.05092080e+00
 5.06756422e+00 5.09082013e+00 5.11543613e+00 5.14780569e+00
 5.17878314e+00 5.20941492e+00 5.23153054e+00 5.23694570e+00
 5.24473439e+00 5.25603850e+00 5.26876575e+00 5.28291076e+00
 5.29281587e+00 5.29918004e+00 5.31680768e+00 5.34030391e+00
 5.36269460e+00 5.38404853e+00 5.40958027e+00 5.43226770e+00
 5.45652665e+00 5.49688819e+00 5.54163417e+00 5.58478747e+00
 5.63135991e+00 5.68056596e+00 5.71940387e+00 5.75717950e+00
 5.80993794e+00 5.86138469e+00 5.91696177e+00 5.97382316e+00
 6.02153906e+00 6.05203165e+00 6.08700353e+00 6.12242100e+00
 6.14872746e+00 6.16705015e+00 6.17769108e+00 6.18088249e+00
 6.15541267e+00 6.13809399e+00 6.15139257e+00 6.15652538e+00
 6.15808738e+00 6.15788279e+00 6.14577684e+00 6.12660287e+00
 6.13659996e+00 6.15148661e+00 6.14627077e+00 6.12633589e+00
 6.10018802e+00 6.06407115e+00 6.00713092e+00 5.98281956e+00
 5.97249671e+00 5.96271485e+00 5.95240117e+00 5.93546232e+00
 5.92232794e+00 5.91422693e+00 5.97046165e+00 6.06545538e+00
 6.16281737e+00 6.25060460e+00 6.34103548e+00 6.43549246e+00
 6.53627911e+00 6.63046805e+00 6.74700127e+00 6.85905641e+00
 6.95834800e+00 7.05273013e+00 7.13917644e+00 7.24726032e+00
 7.39964806e+00 7.59556680e+00 7.79399024e+00 7.98534233e+00
 8.17569516e+00 8.36884427e+00 8.56461382e+00 8.79352869e+00
 9.03836653e+00 9.31098870e+00 9.59412449e+00 9.88896232e+00
 1.01789946e+01 1.04774394e+01 1.07591102e+01 1.10622995e+01
 1.13870962e+01 1.17199973e+01 1.20777988e+01 1.24380029e+01
 1.27757555e+01 1.30931904e+01 1.34431267e+01 1.37992967e+01
 1.41561542e+01 1.45175803e+01 1.48800318e+01 1.52446786e+01
 1.55838252e+01 1.59395041e+01 1.63035692e+01 1.66792644e+01
 1.70903072e+01 1.75178035e+01 1.79214574e+01 1.83133424e+01
 1.86637711e+01 1.90303259e+01 1.94083876e+01 1.97925127e+01
 2.01655181e+01 2.05044069e+01 2.07259057e+01 2.09768598e+01
 2.12123071e+01 2.14488644e+01 2.17019815e+01 2.19797189e+01
 2.22147614e+01 2.23591401e+01 2.24427727e+01 2.25381877e+01
 2.26375492e+01 2.27190975e+01 2.28274633e+01 2.29065786e+01
 2.29091607e+01 2.28231543e+01 2.27213276e+01 2.26176597e+01
 2.25063905e+01 2.23882530e+01 2.22196063e+01 2.19864712e+01
 2.16553825e+01 2.13098431e+01 2.09509008e+01 2.05707485e+01
 2.01852131e+01 1.97307544e+01 1.92030210e+01 1.86058872e+01
 1.80084084e+01 1.73635069e+01 1.66879485e+01 1.59779206e+01
 1.52004866e+01 1.43907358e+01 1.35341324e+01 1.26751737e+01
 1.18250064e+01 1.09842348e+01 1.01130022e+01 9.23061086e+00
 8.35182906e+00 7.52164443e+00 6.72886085e+00 5.97403539e+00
 5.25507187e+00 4.54766091e+00 3.91047172e+00 3.34909092e+00
 2.82034306e+00 2.35008807e+00 1.92183850e+00 1.54267398e+00
 1.19890742e+00 8.96292111e-01 6.35873587e-01 4.19085596e-01
 2.51303000e-01 1.27580352e-01 4.52034489e-02 4.40906451e-03
 6.23663886e-03 5.05968823e-02 1.35713575e-01 2.56359286e-01
 4.12187729e-01 5.96790468e-01 8.06110907e-01 1.04947114e+00
 1.31822046e+00 1.59021869e+00 1.88284504e+00 2.18165355e+00
 2.49380282e+00 2.82251275e+00 3.13681657e+00 3.45879683e+00
 3.78744139e+00 4.11443024e+00 4.44427161e+00 4.76719298e+00
 5.08063620e+00 5.41039389e+00 5.74065727e+00 6.06686939e+00
 6.39179670e+00 6.71287167e+00 7.02317190e+00 7.33272496e+00
 7.61439065e+00 7.86709483e+00 8.13720946e+00 8.40034640e+00
 8.64435852e+00 8.89742802e+00 9.14966102e+00 9.39033744e+00
 9.60565081e+00 9.78710674e+00 9.95465087e+00 1.01035284e+01
 1.02301174e+01 1.03297425e+01 1.04070982e+01 1.04546734e+01
 1.04880795e+01 1.05102026e+01 1.05292928e+01 1.05311880e+01
 1.05605404e+01 1.05756690e+01 1.05863457e+01 1.05711007e+01
 1.05423022e+01 1.05041253e+01 1.04634654e+01 1.03994536e+01
 1.03000768e+01 1.01884796e+01 1.00361156e+01 9.87105494e+00
 9.69708079e+00 9.50599503e+00 9.29619769e+00 9.06093174e+00
 8.81035884e+00 8.51777550e+00 8.21052129e+00 7.90006536e+00
 7.58176988e+00 7.24701813e+00 6.90192147e+00 6.57058606e+00
 6.22621573e+00 5.90135244e+00 5.57706899e+00 5.25223609e+00
 4.95057914e+00 4.68252445e+00 4.41941855e+00 4.15002089e+00
 3.89456005e+00 3.63968837e+00 3.38492120e+00 3.12354773e+00
 2.85285797e+00 2.59698390e+00 2.33377033e+00 2.08744050e+00
 1.85015170e+00 1.62484469e+00 1.40347763e+00 1.18780428e+00
 9.86602584e-01 8.01330704e-01 6.37405198e-01 4.95999370e-01
 3.73535579e-01 2.69232056e-01 1.82024711e-01 1.12404219e-01
 5.86935240e-02 2.37310097e-02 4.58105599e-03 2.93256211e-04
 1.03816994e-02 3.54335806e-02 7.60416311e-02 1.33502587e-01
 2.05434917e-01 2.95940359e-01 4.00982364e-01 5.15131126e-01
 6.43651378e-01 7.83659728e-01 9.35973220e-01 1.09656117e+00
 1.26016517e+00 1.42793669e+00 1.61473030e+00 1.81831183e+00
 2.02704352e+00 2.23359593e+00 2.44710202e+00 2.65234269e+00
 2.85680554e+00 3.07042722e+00 3.28595788e+00 3.50085701e+00
 3.71453899e+00 3.92429968e+00 4.11294144e+00 4.30313898e+00
 4.49830876e+00 4.69536352e+00 4.90835054e+00 5.14814515e+00
 5.38206324e+00 5.61399640e+00 5.84689285e+00 6.08385894e+00
 6.31935683e+00 6.54586238e+00 6.75208504e+00 6.95986036e+00
 7.16359496e+00 7.37188569e+00 7.55675510e+00 7.74035175e+00
 7.90737924e+00 8.05581753e+00 8.20403538e+00 8.35386433e+00
 8.50201285e+00 8.62420045e+00 8.74009527e+00 8.85138862e+00
 8.95453151e+00 9.05665091e+00 9.15264608e+00 9.23895360e+00
 9.30656703e+00 9.37580220e+00 9.44623568e+00 9.52052847e+00
 9.59137423e+00 9.66787999e+00 9.74338394e+00 9.79071936e+00
 9.83592552e+00 9.87861334e+00 9.91246703e+00 9.95151858e+00
 9.97102678e+00 9.97904631e+00 9.94866100e+00 9.92201801e+00
 9.88784081e+00 9.84393659e+00 9.79688967e+00 9.74042467e+00
 9.66813203e+00 9.57962189e+00 9.47940967e+00 9.35896921e+00
 9.21517487e+00 9.06287454e+00 8.91832533e+00 8.77417181e+00
 8.60742723e+00 8.43567599e+00 8.26300167e+00 8.07399234e+00
 7.88092602e+00 7.68596411e+00 7.48453991e+00 7.25684169e+00
 7.02392562e+00 6.78323148e+00 6.53988626e+00 6.30675261e+00
 6.07974188e+00 5.85532269e+00 5.62231514e+00 5.38583224e+00
 5.15076175e+00 4.91093359e+00 4.67377179e+00 4.45213211e+00
 4.24038197e+00 4.02547020e+00 3.81339933e+00 3.60360982e+00
 3.40278334e+00 3.20485581e+00 3.01278885e+00 2.82661959e+00
 2.64046744e+00 2.45954994e+00 2.28621269e+00 2.12031853e+00
 1.95978777e+00 1.80865798e+00 1.65701512e+00 1.50620154e+00
 1.35766127e+00 1.21438116e+00 1.07614892e+00 9.45545447e-01
 8.26015425e-01 7.16647683e-01 6.15625833e-01 5.23953102e-01
 4.36528305e-01 3.53491402e-01 2.80865247e-01 2.15405234e-01
 1.53109950e-01 9.92788485e-02 5.66539901e-02 2.54244243e-02
 6.01412521e-03 2.32612685e-05 7.79824189e-03 2.88784247e-02
 6.26950688e-02 1.09909398e-01 1.69531022e-01 2.41145398e-01
 3.25527450e-01 4.22361897e-01 5.29283626e-01 6.49271650e-01
 7.80063275e-01 9.15968090e-01 1.05169925e+00 1.19075082e+00
 1.32997871e+00 1.46341456e+00 1.59934292e+00 1.73881950e+00
 1.87317771e+00 1.99789977e+00 2.12786196e+00 2.25928718e+00
 2.37996029e+00 2.49965170e+00 2.61607586e+00 2.73715689e+00
 2.87363768e+00 3.01172309e+00 3.14207606e+00 3.25352937e+00
 3.36201132e+00 3.46899006e+00 3.56171849e+00 3.63767302e+00
 3.72062711e+00 3.79554250e+00 3.81935213e+00 3.82737292e+00
 3.83448508e+00 3.84120027e+00 3.84959396e+00 3.85799184e+00
 3.85615105e+00 3.83194134e+00 3.81366913e+00 3.79534035e+00
 3.75902461e+00 3.70401349e+00 3.65105999e+00 3.59566162e+00
 3.49716077e+00 3.39656097e+00 3.30211826e+00 3.18422912e+00
 3.05012308e+00 2.93136849e+00 2.80518896e+00 2.65381412e+00
 2.50913358e+00 2.36844444e+00 2.21943116e+00 2.07287488e+00
 1.92905726e+00 1.78475292e+00 1.62476190e+00 1.46853429e+00
 1.32194864e+00 1.16849163e+00 1.01456056e+00 8.71019105e-01
 7.38584896e-01 6.11445848e-01 4.94952288e-01 3.91321928e-01
 3.11383185e-01 2.39082583e-01 1.76887504e-01 1.23618614e-01
 7.88747235e-02 4.36579383e-02 1.90906142e-02 4.85216872e-03
 3.19804808e-08 5.08151323e-03 1.98672455e-02 4.38946405e-02
 7.75654196e-02 1.21136508e-01 1.78931925e-01 2.51728563e-01
 3.34626852e-01 4.28376589e-01 5.39159533e-01 6.62998554e-01
 7.98993280e-01 9.53951319e-01 1.12434598e+00 1.31075937e+00
 1.52182288e+00 1.76071631e+00 2.01319261e+00 2.28357441e+00
 2.57572562e+00 2.88371483e+00 3.20452497e+00 3.54280131e+00
 3.89660603e+00 4.25725619e+00 4.62360023e+00 4.97488664e+00
 5.32955133e+00 5.68948028e+00 6.04747831e+00 6.40594260e+00
 6.75834933e+00 7.10134439e+00 7.43258348e+00 7.75505180e+00
 8.07495108e+00 8.33055678e+00 8.54406138e+00 8.75705943e+00
 8.95448792e+00 9.13921742e+00 9.31575741e+00 9.49040468e+00
 9.68412885e+00 9.88603837e+00 1.00895669e+01 1.02943396e+01
 1.05000834e+01 1.07043597e+01 1.08991413e+01 1.11094814e+01
 1.13264256e+01 1.15375009e+01 1.17253717e+01 1.18858348e+01
 1.20344825e+01 1.21775998e+01 1.22872569e+01 1.23881308e+01
 1.24800008e+01 1.25646220e+01 1.26292087e+01 1.26773200e+01
 1.27172151e+01 1.26924834e+01 1.26558655e+01 1.26137403e+01
 1.25179738e+01 1.23886817e+01 1.22502210e+01 1.21085805e+01
 1.19352520e+01 1.17506798e+01 1.15884115e+01 1.14287247e+01
 1.12438139e+01 1.10505100e+01 1.08596590e+01 1.06294443e+01
 1.04078453e+01 1.01834273e+01 9.96549448e+00 9.73765932e+00
 9.50650892e+00 9.28162347e+00 9.06350806e+00 8.83917892e+00
 8.61115433e+00 8.39191891e+00 8.17254843e+00 7.95143054e+00
 7.74432031e+00 7.48775079e+00 7.23061397e+00 6.97579503e+00
 6.72453285e+00 6.47629312e+00 6.25002289e+00 6.02403209e+00
 5.78836684e+00 5.55062594e+00 5.31303736e+00 5.07568329e+00
 4.83617687e+00 4.59687855e+00 4.35449152e+00 4.09323694e+00
 3.83407090e+00 3.58112255e+00 3.34119176e+00 3.10159490e+00
 2.86510689e+00 2.63282706e+00 2.40210428e+00 2.17804929e+00
 1.96734215e+00 1.76420385e+00 1.56763715e+00 1.38036067e+00
 1.20292642e+00 1.03650487e+00 8.84194341e-01 7.45254836e-01
 6.17857746e-01 5.02667942e-01 3.98884182e-01 3.04562895e-01
 2.19265680e-01 1.47708298e-01 9.18414482e-02 4.89349701e-02
 1.85803054e-02 2.42466343e-03 1.45509256e-03 1.57964232e-02
 4.55537999e-02 9.06111238e-02 1.52429746e-01 2.27109259e-01
 3.14980162e-01 4.16821940e-01 5.33165174e-01 6.64423149e-01
 8.04298600e-01 9.64077320e-01 1.14729263e+00 1.34875592e+00
 1.56937058e+00 1.81272765e+00 2.07654830e+00 2.35957851e+00
 2.67025545e+00 2.98719678e+00 3.31910637e+00 3.65563800e+00
 3.99626986e+00 4.34348497e+00 4.70432364e+00 5.08206477e+00
 5.47086983e+00 5.87361099e+00 6.27524777e+00 6.65267470e+00
 7.02641854e+00 7.40387052e+00 7.79364153e+00 8.17379566e+00
 8.54234865e+00 8.88967122e+00 9.21879056e+00 9.54183830e+00
 9.85409200e+00 1.01652313e+01 1.04615412e+01 1.07010718e+01
 1.08972832e+01 1.10664986e+01 1.12651246e+01 1.14587251e+01
 1.16462802e+01 1.18508567e+01 1.20483667e+01 1.21903911e+01
 1.23062234e+01 1.24484831e+01 1.25874618e+01 1.27943478e+01
 1.30060574e+01 1.32016036e+01 1.33540809e+01 1.34895213e+01
 1.36048956e+01 1.37438413e+01 1.38798474e+01 1.39973882e+01
 1.41024212e+01 1.41830208e+01 1.42421892e+01 1.42568256e+01
 1.42676368e+01 1.42663394e+01 1.42200164e+01 1.41498553e+01
 1.40278522e+01 1.38904200e+01 1.38455776e+01 1.37751481e+01
 1.36952726e+01 1.35881987e+01 1.34662307e+01 1.33289099e+01
 1.31890826e+01 1.30554255e+01 1.29319525e+01 1.28089833e+01
 1.26549056e+01 1.24741503e+01 1.22672359e+01 1.20503857e+01
 1.18090536e+01 1.15658858e+01 1.13187955e+01 1.10882788e+01
 1.08507202e+01 1.05995347e+01 1.03293641e+01 1.00419313e+01
 9.76452414e+00 9.51027085e+00 9.24970634e+00 8.97425839e+00
 8.63511087e+00 8.32095292e+00 8.03293445e+00 7.76107904e+00
 7.48640022e+00 7.21699563e+00 6.95143590e+00 6.69725224e+00
 6.44647235e+00 6.20134698e+00 5.95882371e+00 5.71659652e+00
 5.46377405e+00 5.23265017e+00 5.05332986e+00 4.85175969e+00
 4.64152355e+00 4.43241935e+00 4.22395427e+00 4.01121979e+00
 3.80214245e+00 3.60622771e+00 3.42349850e+00 3.24319916e+00
 3.06527382e+00 2.88885359e+00 2.72116205e+00 2.54638938e+00
 2.35174668e+00 2.17425434e+00 2.00350943e+00 1.83628654e+00
 1.67716909e+00 1.53002902e+00 1.38320273e+00 1.23553314e+00
 1.09578754e+00 9.62820445e-01 8.36503554e-01 7.18730174e-01
 6.30294037e-01 5.63847144e-01 5.11384930e-01 4.60534338e-01
 4.10460673e-01 3.61249638e-01 3.13500547e-01 2.69113811e-01
 2.32133163e-01 2.00341167e-01 1.69424097e-01 1.40920931e-01
 1.14322046e-01 8.94242273e-02 6.47784808e-02 4.27104818e-02
 2.47770952e-02 1.12650544e-02 2.89227115e-03 4.17492002e-07
 2.98614824e-03 1.20717125e-02 2.82067075e-02 5.21284356e-02
 8.49550611e-02 1.26296470e-01 1.76387278e-01 2.34548950e-01
 2.99338542e-01 3.62698383e-01 4.31251174e-01 5.06823095e-01
 5.90747038e-01 6.83881214e-01 7.86996087e-01 8.90959178e-01
 9.98077091e-01 1.10142803e+00 1.20647014e+00 1.31715579e+00
 1.43745989e+00 1.56871732e+00 1.70653015e+00 1.84394252e+00
 1.97915189e+00 2.11928438e+00 2.26496980e+00 2.41570167e+00
 2.57783429e+00 2.76307101e+00 2.95261648e+00 3.14557189e+00
 3.34536302e+00 3.55413386e+00 3.77767065e+00 4.01387132e+00
 4.22172480e+00 4.43707421e+00 4.67662988e+00 4.92700635e+00
 5.18809710e+00 5.46223191e+00 5.74933064e+00 6.02852247e+00
 6.25793675e+00 6.49424800e+00 6.74263596e+00 7.00353317e+00
 7.27793509e+00 7.56129774e+00 7.83740159e+00 8.08659193e+00
 8.35955466e+00 8.64219412e+00 8.92915186e+00 9.21290930e+00
 9.50104966e+00 9.76488650e+00 9.98844609e+00 1.02242694e+01
 1.04557493e+01 1.06930957e+01 1.09308692e+01 1.11836533e+01
 1.14476237e+01 1.16984467e+01 1.19266469e+01 1.21669081e+01
 1.24245919e+01 1.26841307e+01 1.29512018e+01 1.31905842e+01
 1.34434849e+01 1.37041727e+01 1.39733446e+01 1.42501094e+01
 1.45423032e+01 1.48372797e+01 1.51067157e+01 1.53344804e+01
 1.55519056e+01 1.57617262e+01 1.59641677e+01 1.61585554e+01
 1.63506136e+01 1.64926751e+01 1.66063972e+01 1.67281740e+01
 1.68525247e+01 1.69696418e+01 1.70878636e+01 1.72137856e+01
 1.73299550e+01 1.74602937e+01 1.75933665e+01 1.77238273e+01
 1.78347406e+01 1.79245751e+01 1.79992828e+01 1.80071223e+01
 1.79542726e+01 1.78845828e+01 1.78060696e+01 1.77097289e+01
 1.75893576e+01 1.74640461e+01 1.73459035e+01 1.72469879e+01
 1.71571789e+01 1.70529426e+01 1.69287504e+01 1.67795705e+01
 1.66168579e+01 1.64188770e+01 1.62010712e+01 1.59759316e+01
 1.57355437e+01 1.54622662e+01 1.51625825e+01 1.48444005e+01
 1.44906218e+01 1.41077829e+01 1.37244329e+01 1.33319096e+01
 1.29249946e+01 1.24815609e+01 1.20097087e+01 1.16039356e+01
 1.12191452e+01 1.08382917e+01 1.04599722e+01 1.00690513e+01
 9.66035020e+00 9.24174282e+00 8.88435144e+00 8.54195381e+00
 8.18896929e+00 7.83629305e+00 7.47200792e+00 7.09973413e+00
 6.72631223e+00 6.42205540e+00 6.14060065e+00 5.86098411e+00
 5.57834740e+00 5.28925136e+00 4.98882848e+00 4.69032551e+00
 4.45642404e+00 4.23779260e+00 4.02422908e+00 3.81997213e+00
 3.61601661e+00 3.41558168e+00 3.21642391e+00 3.09701292e+00
 2.98639511e+00 2.87934223e+00 2.77140394e+00 2.66620300e+00
 2.56449078e+00 2.46226414e+00 2.41166556e+00 2.35623398e+00
 2.29296769e+00 2.22965889e+00 2.16741656e+00 2.10688717e+00]
SPM{F} inference field
   SPM.effect    :   Main A
   SPM.z         :  (1x1000) raw test stat field
   SPM.df        :  (1.972, 120.626)
   SPM.fwhm      :  110.47419
   SPM.resels    :  (1, 9.04284)
Inference:
   SPM.alpha     :  0.050
   SPM.zstar     :  6.44924
   SPM.h0reject  :  True
   SPM.p_set     :  <0.001
   SPM.p_cluster :  (0.002, 0.023, 0.015, 0.011, 0.006, 0.002)
