# Supplementary material for: The Application of Statistical Parametric Mapping to Evaluate Differences in Topspin Backhand between Chinese and Polish Female Table Tennis Players
Source: Appl Bionics Biomech. 2021 Jul 14;2021:5555874. doi: 10.1155/2021/5555874 (PMC8339346; doi:10.1155/2021/5555874)
Supplement: Supplementary Materials — Angles and accelerations. [file 5555874.f1.zip › Knee RT-Flexion (deg) cykleSPM.txt]

[ 60.76079112  59.74611026  58.72992438  57.70135478  56.67989236
  55.68434713  54.73816771  53.82967272  52.98938834  52.15501065
  51.32332159  50.49303707  49.67066073  48.8577121   48.08889659
  47.43245198  46.77388951  46.12695999  45.47215369  44.80214496
  44.14306175  43.52435376  43.04108422  42.56304232  42.11682465
  41.67059775  41.2255157   40.78605987  40.40803452  40.14651111
  39.88081677  39.64805831  39.45109396  39.26769869  39.09135523
  38.95173717  38.95481637  38.95663511  38.94496729  38.95054781
  38.94656529  38.94875033  38.94473054  38.91281819  38.8800801
  38.86033115  38.84873711  38.83416899  38.83143383  38.73171984
  38.41898854  38.116871    37.82816863  37.54120644  37.25818061
  36.99135129  36.61861827  36.07341846  35.51846548  34.97369385
  34.41450035  33.86131433  33.34641923  32.92474286  32.56469544
  32.19730699  31.807369    31.39380899  30.98411283  30.60051036
  30.35030777  30.13443023  29.88559941  29.62875989  29.37136359
  29.10987905  28.86851665  28.55592708  28.16616106  27.79645846
  27.42727239  27.06428411  26.69982702  26.3515399   25.99745903
  25.64435514  25.28472906  24.93635517  24.60185578  24.27553425
  23.94937549  23.57264939  23.15821206  22.73941292  22.31468482
  21.88821853  21.48633767  21.11127721  20.85713372  20.6558962
  20.45691974  20.25872921  20.0735829   19.88880399  19.68514884
  19.59519232  19.55376945  19.50622794  19.48632042  19.47536859
  19.45022483  19.42039976  19.42856835  19.47716244  19.48258264
  19.48732771  19.48936847  19.4809028   19.47212816  19.50962517
  19.5467607   19.57246408  19.58805211  19.59070144  19.59286308
  19.54242632  19.50349232  19.50296941  19.48740774  19.4732525
  19.44522218  19.40765967  19.45190279  19.55876743  19.67064108
  19.77866716  19.88310347  19.98515754  20.10865507  20.23192346
  20.34910528  20.52896035  20.70935225  20.88718671  21.08748312
  21.27041115  21.46068307  21.69165652  21.93821659  22.18283213
  22.42550671  22.70700454  22.98914438  23.28948561  23.64448654
  23.99839539  24.40966061  24.81622254  25.2213999   25.61477632
  26.03270884  26.53824696  27.17914564  27.81607471  28.4365837
  29.05417235  29.67652971  30.35885321  31.11054376  31.89774511
  32.66953637  33.42434164  34.14014144  34.85550162  35.61797279
  36.41376194  37.21743327  38.01513537  38.76953451  39.49445109
  40.23869452  41.00612449  41.79227106  42.58087479  43.32792838
  44.03239797  44.71143645  45.39408769  46.14641304  46.95217451
  47.70964301  48.41170343  49.04322785  49.62944334  50.25490465
  50.93477677  51.68745808  52.53720664  53.33705583  54.06472374
  54.74910346  55.43674324  56.08029755  56.71630144  57.45556519
  58.15057384  58.76719032  59.31213268  59.91826292  60.60580062
  61.34853489  62.12955146  62.84856233  63.51033238  64.13521422
  64.78965047  65.48531837  66.23930788  67.14186503  67.9834245
  68.7730293   69.5681287   70.38912023  71.29281957  72.19859164
  73.20028136  74.12144885  75.00353635  75.85527991  76.67193063
  77.50246864  78.30687462  79.20499009  79.97922647  80.67066805
  81.30019114  81.83732895  82.49852222  83.10801225  83.77034653
  84.43797144  85.03259087  85.6595158   86.29533393  87.08162933
  87.88158603  88.73492495  89.56597363  90.3359993   91.1620168
  91.97961879  92.97021039  93.95379705  94.86969806  95.77148673
  96.62475903  97.27661932  97.8778456   98.56100678  99.32959284
 100.24082984 101.05312279 101.81148314 102.71099759 103.63612031
 104.66410352 105.7019485  106.78805509 107.83885977 108.81639619
 109.82486504 110.80231637 111.9196865  113.12887589 114.30669213
 115.46409623 116.56092839 117.73187433 118.88232639 120.16668356
 121.6240588  123.07423057 124.50508948 125.88733858 127.35755816
 128.75470014 130.20069035 131.75941301 133.22918867 134.66426667
 136.0938817  137.60380393 139.07697281 140.60405161 142.33762991
 144.03702515 145.66474329 147.21852541 148.65896703 149.66384591
 150.37923437 150.85268742 151.0521194  151.09531991 150.98647764
 150.73519758 150.34811583 149.8829376  149.127411   148.1143365
 146.98860499 145.68846225 144.17950625 142.3669703  140.19771557
 137.8284151  135.17743933 132.19551571 129.02766453 125.74081967
 121.95302959 117.78242611 113.47434299 109.03950094 104.66164596
 100.22496219  95.80620604  91.4632363   87.58777531  84.10181918
  80.72580013  77.43006941  74.16594706  70.95476266  67.75511318
  64.64734044  61.60149481  58.61157165  55.67404941  52.7948041
  49.89460695  47.31880148  44.95911908  42.61070762  40.25476504
  37.98816522  35.86494359  33.81975812  32.09994298  30.52257434
  29.04433659  27.68157539  26.35436944  25.1114266   23.93466355
  22.83856933  21.78032901  20.81044234  19.96830684  19.14201978
  18.33931145  17.54566987  16.65387067  15.77131878  15.01153805
  14.33655082  13.68111301  13.04306772  12.41558263  11.87363298
  11.36391701  10.86495921  10.38250197   9.9004797    9.42507056
   8.96110804   8.62188818   8.28660486   7.95911191   7.6436187
   7.32490864   7.01450337   6.72284071   6.53223561   6.34432576
   6.1663431    6.01046016   5.86475848   5.73842715   5.61648603
   5.54475791   5.48110221   5.427492     5.38694276   5.33679755
   5.29625393   5.25860568   5.23731208   5.21309779   5.19888784
   5.19904695   5.21184084   5.23398897   5.27507789   5.36697035
   5.47339838   5.59511096   5.73616689   5.87468915   6.01302484
   6.17829276   6.39687422   6.6246181    6.86372088   7.11651204
   7.37223047   7.63037857   7.9054033    8.20630055   8.51287382
   8.82760091   9.16562414   9.50660219   9.85343618  10.21424821
  10.58645615  10.95574946  11.33926792  11.74408006  12.14712807
  12.5422006   12.96868103  13.448094    13.92604535  14.43214245
  14.96099027  15.4809239   15.9881939   16.51900169  17.05748112
  17.59599447  18.15628117  18.73170743  19.32006097  19.90373812
  20.50621284  21.12743338  21.74963527  22.38949097  23.05376256
  23.7114616   24.35389834  24.99159067  25.64876205  26.31050999
  27.00639142  27.76535965  28.52201051  29.27741074  30.03915108
  30.80850394  31.56393387  32.32446066  33.10529708  33.88241314
  34.64925802  35.36784104  36.06930222  36.76076969  37.45930878
  38.18314061  38.85140607  39.52412054  40.21995724  40.9168459
  41.60075035  42.29546316  43.01405641  43.73032505  44.43975053
  45.10993905  45.77837959  46.44477432  47.0905312   47.74469597
  48.37746539  48.97542106  49.65973142  50.34480069  51.02943193
  51.69384489  52.31680554  52.91086137  53.47367072  54.00607267
  54.46349181  54.88608537  55.21377415  55.45153545  55.66153729
  55.83350373  55.96552107  56.04762059  56.06208293  56.00829629
  55.86858702  55.67000026  55.44005114  55.06257013  54.60934037
  54.10741259  53.692082    53.30088689  52.89331331  52.46564759
  51.94820866  51.40210387  50.82470029  50.33954649  49.86393167
  49.3475587   48.81149999  48.241876    47.63540008  47.01250762
  46.34549908  45.62072352  44.87077075  44.09006596  43.23427287
  42.36394588  41.51781019  40.73786193  39.96962111  39.17335219
  38.34925767  37.49629475  36.67516116  35.83291097  34.99756587
  34.13279275  33.24511391  32.39355418  31.59362681  30.76791129
  29.94354825  29.15050939  28.34703722  27.54030468  26.74631815
  25.94615041  25.1374832   24.33344944  23.54943971  22.74990508
  21.94793242  21.12288359  20.27233433  19.42222873  18.5786552
  17.7887999   17.05974274  16.33482238  15.57235964  14.78363488
  14.00636158  13.2546996   12.55594677  11.88927542  11.22882322
  10.59927089   9.99529133   9.41511945   8.86551073   8.3546536
   7.87097214   7.40066495   6.95722771   6.5400494    6.1314728
   5.74406708   5.38466381   5.04592092   4.71697584   4.44215913
   4.19688203   3.96057466   3.74494603   3.53320131   3.33072191
   3.13807877   2.98212253   2.84147061   2.70722011   2.58176669
   2.46968858   2.35956701   2.25191451   2.16099546   2.07673945
   1.99568806   1.92882259   1.87441666   1.82560543   1.77850732
   1.73933945   1.70351305   1.66924408   1.64074417   1.63138831
   1.63397441   1.63625672   1.66326609   1.69188774   1.7198143
   1.75212618   1.79580187   1.84676447   1.9009149    1.99706619
   2.09134388   2.18329271   2.27073724   2.35831649   2.44695081
   2.53777872   2.6612168    2.78380602   2.9214765    3.07747439
   3.24066201   3.4140411    3.58916254   3.81689143   4.04494518
   4.28204081   4.53083531   4.80300268   5.09085123   5.38836389
   5.71316675   6.04640193   6.37134302   6.69475852   7.04165722
   7.41245912   7.79986707   8.21806816   8.64534717   9.08245159
   9.53223173  10.01210037  10.51306851  11.03581828  11.60237836
  12.18547263  12.80323625  13.44698575  14.10131682  14.77041784
  15.46395592  16.19263919  16.93139395  17.67148191  18.42490692
  19.23259895  20.07198117  20.94383787  21.84950187  22.76893405
  23.67791865  24.59557808  25.57090095  26.610469    27.72936811
  28.90891336  30.11838017  31.34347244  32.59990665  33.90969891
  35.24944677  36.63615289  38.08573719  39.58119017  41.14408563
  42.72012447  44.34578544  46.02786605  47.77805246  49.5871437
  51.45348091  53.34790581  55.29188811  57.22811792  59.16463649
  61.16204241  63.17234332  65.17717794  67.18560438  69.20568772
  71.27406627  73.40876102  75.58009172  77.82806506  80.14640418
  82.51938743  84.96406941  87.41740783  89.90291443  92.55814675
  95.38650498  98.36953561 101.58635362 104.9040867  108.38441314
 111.60496622 114.92192637 118.36798494 121.91772586 125.5380171
 129.23551053 132.99089105 136.76208602 140.61337674 144.50170475
 148.56151154 152.71996102 156.497114   160.28272197 164.08499139
 167.8364746  171.54751523 175.23425973 178.4617703  181.45653962
 184.07846346 186.49352468 188.87517678 191.08738119 194.44224879
 197.88810883 201.16780389 204.10304328 206.75143482 209.08466561
 212.13318193 215.36724189 218.4667555  221.4735383  224.23271643
 226.72448496 228.42501028 230.11924864 231.92349456 233.58359032
 235.10298303 236.33100396 237.15975379 237.97238712 238.74206986
 239.55695416 240.17034021 240.72165823 241.98829405 243.08357117
 244.2464664  245.27795111 246.1919044  247.08307584 248.8319463
 250.31037003 251.48052305 251.91140168 252.22009377 252.6172664
 253.87047581 254.878637   255.61561771 256.21734639 256.81036847
 257.28228608 257.86800875 258.28358363 258.52348292 258.52330952
 258.52747113 258.6741467  258.37794034 257.93225315 257.32067206
 256.42396122 255.06328785 253.52886175 251.96371538 250.32632586
 248.53874761 246.49426517 244.13936668 242.51894498 240.76657049
 238.44508251 235.89879845 233.18521336 230.31712671 227.34398974
 224.49238997 221.87508587 219.61517387 217.52849064 215.33966991
 213.19960522 211.0567592  208.93626074 207.20213615 205.93234983
 204.89031147 203.72502239 202.47241925 201.18656794 199.75422438
 198.22207293 196.59540014 195.27627316 194.12801107 192.91229582
 191.67439431 190.28031713 189.07911402 187.91258133 186.55429477
 185.13916686 183.64837097 182.03012422 180.56503067 179.17627699
 177.78912741 176.26541115 174.67406909 172.92748396 171.06761568
 169.33782329 167.31060988 165.09649358 162.76521844 160.32582353
 157.7803233  155.09446376 152.74657591 150.73655072 148.84259419
 146.94563347 144.96418756 142.90635725 140.7035861  138.65229347
 137.4560075  136.42611985 135.36091639 134.18882978 132.89173743
 131.4610584  129.92451298 128.82943938 127.71872461 126.5176977
 125.14458384 123.64948601 122.02051    120.37437645 119.06775716
 117.76264824 116.36143874 114.84425314 113.18419422 111.38489223
 109.7054419  108.53240523 107.25962162 105.8965349  104.47776245
 102.9871315  101.40246906 100.0359198   99.11489081  98.18276779
  97.10824484  95.95780321  94.75838736  93.54405849  92.62275489
  92.21255028  91.65722364  90.9775148   90.16894783  89.29177057
  88.36142046  87.58451032  86.75821425  85.85277137  84.90303877
  83.88998755  82.74956406  81.57405588  80.87374527  80.47846821
  79.97967656  79.36334566  78.62227277  77.82093585  76.94231863
  76.3862795   76.02268854  75.61175748  75.13151929  74.59726714
  74.00879176  73.37384382  73.07615119  73.10133344  72.98971362
  72.78563045  72.46443203  72.02754905  71.52424497  71.20603831
  71.09586689  70.98731624  70.85520842  70.68007111  70.42942955
  70.11641774  69.74230988  69.36754693  68.91614674  68.34475706
  67.72744566  67.1049179   66.4574833   66.34890796  66.36272435
  66.37385407  66.41540744  66.41742071  66.33772201  66.22994338
  66.30910851  66.34492485  66.31669156  66.2645892   66.17200337
  66.05606748  65.89191413  65.97444566  66.1330407   66.25279325
  66.33113989  66.36658641  66.34908026  66.33980784  66.48480572
  66.66218944  66.80416697  66.9058209   66.96409371  66.9806408
  66.97256506  67.29342241  67.671991    68.00614311  68.30842498
  68.60609953  68.96570661  69.31122553  69.69221439  70.01333091
  70.28620383  70.52273919  70.73359881  70.87658528  71.03018417
  71.36095419  71.68880169  71.97756691  72.26691516  72.55910291
  72.82664175  73.06238052  73.07540244  73.02363369  72.89924028
  72.7557587   72.57287077  72.33989982  72.0775177   71.5517017
  70.87144911  70.12490839  69.29397015  68.37993516  67.38075998]
SPM{F} inference field
   SPM.effect    :   Main A
   SPM.z         :  (1x1000) raw test stat field
   SPM.df        :  (1.964, 119.863)
   SPM.fwhm      :  93.13947
   SPM.resels    :  (1, 10.72585)
Inference:
   SPM.alpha     :  0.050
   SPM.zstar     :  6.66745
   SPM.h0reject  :  True
   SPM.p_set     :  <0.001
   SPM.p_cluster :  (<0.001, <0.001, <0.001)
